# Supplementary material for: An improved protein extraction method applied to cotton leaves is compatible with 2-DE and LC-MS
Source: PubMed Central journal article supplement (PMC6458646; doi:10.1186/s12864-019-5658-5), 2019-04-11
Supplement: 12864_2019_5658_MOESM4_ESM.pdf [file 12864_2019_5658_MOESM4_ESM.pdf]

**Additional file 4**

**Spot No.: A1**

**Protein name: Translation elongation factor EFG/EF2 protein**

**Peptide sequences:**

**R.INIIDTPGHVDFTLIVER.A;K.FEYADIPADLQELAEYR.S;K.I  
MTDPFVGS�TFVR.V;R.AVLVDGSYHDVDSSVLAFLAAR.G**

**Accession No.: Gohir.A11G019900.1.p**

**Mascot score: 180**

**Sequence coverage %: 9**

**Calculated Mr: 86600**

**Calculated pI: 5.54**

**PFF Searched Score:**

Ions score is  $-10 \cdot \log(P)$ , where P is the probability that the observed match is a random event. Individual ions scores  $> 33$  indicate identity or extensive homology ( $p < 0.05$ ). Protein scores are derived from ions scores as a non-probabilistic basis for ranking protein hits.

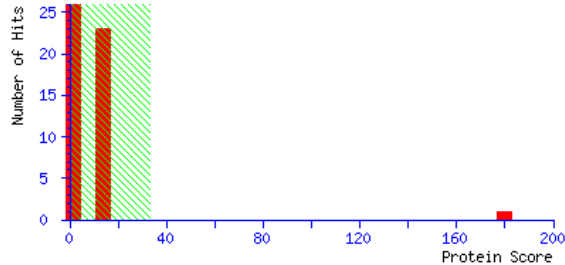

**Matched peptide sequences: shown in Bold Red:**

```
1 MAAETALRVS SSSSTVCNLN GFQRRPTPLS SSTRFLGLRP RASSSSISS
51 LSQFMGSVRI GSRLPISLQQ KGKRRNFSLF AMAADESKRA VPLKDYRNIG
101 IMAHIDAGKT TTTERILYYT GRNYKIGEVH EGTATMDWME QEQERGITIT
151 SAATTTFWKD HRINIIDTPG HVDFTLIVER ALRVLDGAIC LFDSVAGVEP
201 QSETVWRQAD KYGVPRICFV NKMDRLGANF FRTRDMIVTN LGAKPLVIQL
251 PVGAEDNFKG VIDLVKMKAV LWSGEELGAK FEYADIPADL QELAEYRSQ
301 MIETIVELDD QAMENYLEGV EPDEETIKKL IRKGTIGISF VPVLCGSAFK
351 NKGVQPLLDV VMDYLPSPLE LPAMKGTDPE NPEVIIERTA SDEEPPFSGLA
401 FKIMTDPFVG SLTFVRVYSG KLAAGSYVLN ANKGKKERIG RLEMHANSR
451 EDVKVALAGD IVALAGLKDT ITGETLSDPD HPIVLERMDF PDPVIKVAIE
501 PKTKADVDM ANGLIKLAQE DPSFHFSRDE EINQTVIEGM GELHLEIIVD
551 RLKREFKVEA NVGAPQVNYR ESISKVSEVK YVHKKQSGGQ GQFADITVRF
601 EPMDAGSGYE FKSEIKGGAV PKEYIPGVMK GLEECMCNGV LAGFPVVDVR
651 AVLVDGSYHD VDSVLAFLAAR AARGAFREGI RKAGPRMLEP IMKVEVVTPE
701 EHLGDVIGDL NSRRGQINSF GDKPGGLKVV DALVPLAEMF QYVSTLRGMT
751 KGRASYTMQL AKFDVVPQHI QNELATKQEE VVA
```

Spot No.: **A2**

Protein name: **Chloroplast heat shock protein 70-2**

Peptide sequences:

**K.AVVTVPAYFNDSQR.T;R.VKFEELCSDLLDR.L;K.DIDEVILV  
GGSTR.I;R.IPAVQELVR.K;K.SEVFSTAADGQTSVEINVLQGER.  
E**

Accession No.: **Gohir.D09G212600.1.p**

Mascot score: **239**

Sequence coverage %: **10**

Calculated Mr: **75693**

Calculated pI: **5.17**

PFF Searched Score:

Ions score is  $-10 \cdot \log(P)$ , where P is the probability that the observed match is a random event.  
Individual ions scores > 34 indicate identity or extensive homology ( $p < 0.05$ ).  
Protein scores are derived from ions scores as a non-probabilistic basis for ranking protein hits.

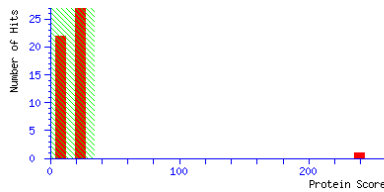

Matched peptide sequences: shown in **Bold Red**:

```
1 MASSTAQIHV LGGMGFDSSR KPNQHSSRTV FFGQRLGKTS PLNATFLRLA
51 KTKNSNGKGY NVGPVRRVNE KVVGIDLGTT NSAVAAMEGG KPTIVTNAEG
101 QRTTPSVVAY TKSGDRLVGQ IAKRQAVVNP ENTFFSVKRF IGRKMSEVDE
151 EAKQVSYKVI RDENGNVKLE CPAISKQFAA EEISAQVLRK LVDDASKFLS
201 ESVTKAVVTV PAYFNDSQRT ATKDAGRIAG LEVLRIINEP TAASLAYGFE
251 KKNNETILVF DLGGGTFDVS VLEVGDGVFE VLSTSGDTHL GGDDFDKRIV
301 DWLAENFKRD EGIDLLKDKQ ALQRLTEAAE KAKMELSTLT QTNISLPFIT
351 ATADGPKHIE TTLTRVKFEE LCSDLLDRLK KPVENALGDA KLSFKDIDEV
401 ILVGGSTRIP AVQELVRKMT GKEPNVTVNP DEVVALGAAV QAGVLAGDVS
451 DIVLLDVTPL SLGLETGGV MTKIIPRNTT LPTSKSEVFS TAADGQTSVE
501 INVLQGEREF VRDNKSLGSF RLDGIPPAPR GVPQIEVKFD IDANGILSVT
551 AVDKGTGKKQ DITITGASTL PGDEVDRMVK EAERFAQEDK EKRD AIDTKN
601 QADSAVYQTE KQLKELGDKV PGPVKEKVDA KLQELKDAIS GGSTQGMKDA
651 MAALNQEVQM LGQSLYNQPS AGSAAGPAPG GETGRSDSSN KGSDDEDVIDA
701 DFTDSK
```

Spot No.: **A4**

Protein name: **ATP-dependent zinc metalloprotease FTSH 8**

Peptide sequences:

**R.FLEYLDKDR.V;R.ADILDSALLRPGR.F;K.KFETDVSFDVIAM  
R.T;R.TPGFSGADLANLLNEAAILAGR.R;R.ISDSAYEIALQHIR.  
N**

Accession No.: **Gohir.A01G022900.1.p**

Mascot score: **213**

Sequence coverage %:**10**

Calculated Mr: **74627**

Calculated pI: **6.24**

PFF Searched Score:

Ions score is  $-10 \cdot \log(P)$ , where P is the probability that the observed match is a random event.  
Individual ions scores  $> 34$  indicate identity or extensive homology ( $p < 0.05$ ).  
Protein scores are derived from ions scores as a non-probabilistic basis for ranking protein hits.

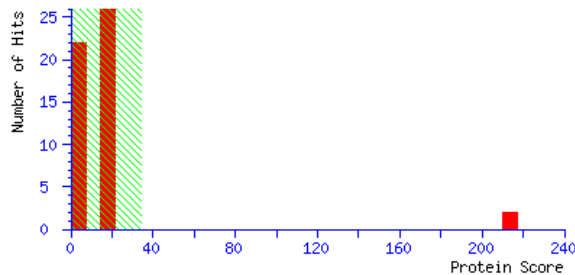

Matched peptide sequences: shown in **Bold Red**:

```
1 MAASSACLLG NGPSTHRTKS KLSKEFYGRN IVFTPAISSL GRKSNVAVLVK
51 ASLKHKQHEG RRGFLKSLLG TAGIGVPALL GNGKAYADEQ GVSSSRMSYS
101 R.FLEYLDKDR VKKVDLFENG TIAIVEAVSP ELGNRVQRVR VQLPGLSQEL
151 LQKFREKNID FAAHNAQEDS GSLLFNLIGN LAFPLILIGG LFLLSRRSSG
201 GMGGPGGPGF PLAFGQSKAK FQMEPNTGVT FDDVAGVDEA KQDFMEVVEF
251 LKKPERFTAV GARIPKGVLL IGPPGTGKTL LAKAIAGEAG VPPFSISGSE
301 FVEMFVGVA SRVRDLFKKA KENAPCIVFV DEIDAVGRQR GTGIGGGNDE
351 REQTLNQLLT EMDGFEGNTG IIVIAATNRA DILDSALLRP GRFDRQVTVD
401 VPDIRGRTEI LKVHGSNKKF ETDVSFDVIA MRTPGFSGAD LANLLNEAAI
451 LAGRRGKTAI SSKEIDDSID RIVAGMEGTV MTDGKSKSLV AYHEVGHAIC
501 GTLTPGHDPV QKVTLIPRGQ ARGLTWFIPS DDPTLISKQQ LFARIVGGLG
551 GRAAEEIIFG EPEVTTGAAG DLQQITGLAK QMVVTFGMSE IGPWSLMDSS
601 AQSADVIMRM MARNSMSEKL AEDIDTAVKR ISDSAYEIAL QHIRNNREAI
651 DKIVEVLEK ETMSGDEFRA ILSEFVEIPA ENQVPPSVPT PVSV
```

Spot No.: A6

Protein name: ATP-dependent zinc metalloprotease FTSH 8

Peptide sequences:

K.KVDLFENG TIAIVEAVSPELGNR.V;K.AKENAPCIVFVDEIDA  
VGR.Q;K.ENAPCIVFVDEIDAVGR.Q;R.ADILDSALLRPGR.F;K.  
KFETDVSFDVIAMR.T;R.TPGFSGADLANLLNEAAILAGR.R;R.I  
SDSAYEIALQHIR.N

Accession No.: Gohir.A01G022900.1.p

Mascot score: 488

Sequence coverage %: 15

Calculated Mr: 74627

Calculated pI: 6.24

PFF Searched Score:

Ions score is  $-10 \cdot \log(P)$ , where P is the probability that the observed match is a random event. Individual ions scores  $> 33$  indicate identity or extensive homology ( $p < 0.05$ ). Protein scores are derived from ions scores as a non-probabilistic basis for ranking protein hits.

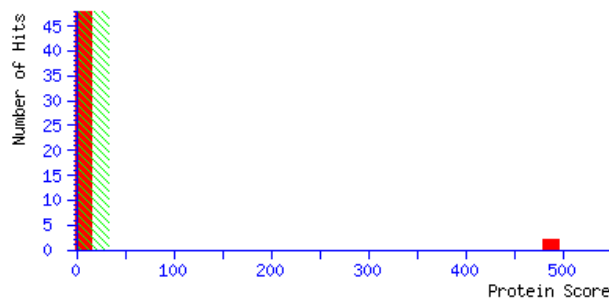

Matched peptide sequences: shown in **Bold Red**:

```
1 MAASSACLLG NGPSTHRTKS KLSKEYFYGRN IVFTPAISSL GRKSNAVLVK
51 ASLKHKQHEG RRGFLKSLLG TAGIGVPALL GNGKAYADEQ GVSSSRMSYS
101 RFLEYLDKDR VKVDLFENG TIAIVEAVSP ELGNRVQRVR VQLPGLSQEL
151 LQKFREKNID FAAHNAQEDS GSLLFNLIGN LAFPLILIGG LFLLSRRSSG
201 GMGGPGGPGF PLAFGQSKAK FQMEPNTGVT FDDVAGVDEA KQDFMEVVEF
251 LKKPERFTAV GARIPKGVLL IGPPGTGKTL LAKAIAGEAG VPFPSISGSE
301 FVEMFVGVA SRVRDLFKKA KENAPCIVFV DEIDAVGRQR GTGIGGGNDE
351 REQTLNQLLT EMDGFEGNTG IIVIAATNRA DILDSALLRP GRFDRQVTVD
401 VPDIRGRTEI LKVHGSNKKF ETDVSFDVIA MRTPGFSGAD LANLLNEAAI
451 LAGRRGKTAI SSKEIDDSID RIVAGMEGTV MTDGKSKSLV AYHEVGHAIC
501 GTLTPGHDPV QKVTLIPRGQ ARGTLWFIPS DDPTLISKQQ LFARIVGGGLG
551 GRAAEEIIFG EPEVTTGAAG DLQQITGLAK QMVVTFGMSE IGPWSLMDSS
601 AQSADVIMRM MARNSMSEKL AEDIDTAVKR ISDSAYEIAL QHIRNNREAI
651 DKIVEVLLK ETMSGDEFRA ILSEFVEIPA ENQVPPSVPT PVSFV
```

Spot No.: **A8**

Protein name: **Chaperonin-60alpha**

Peptide sequences:

**K.EIAFDQSSR.A;K.LADAVGLTLGPR.G;R.AIELPNAMENAGAA  
LIR.E;R.GYISPQFVTNPEK.L;K.LICEFENAR.V;K.AVLQDIAILT  
GAEFQANDLGLLIENTSVEQLGIAR.K;K.DSTQIIADAASKDEIQ  
AR.V**

Accession No.: **Gohir.A13G232000.1.p**

Mascot score: **623**

Sequence coverage %: **19**

Calculated Mr: **62143**

Calculated pI: **5.15**

PFF Searched Score:

Ions score is  $-10 \cdot \log(P)$ , where P is the probability that the observed match is a random event. Individual ions scores  $> 34$  indicate identity or extensive homology ( $p < 0.05$ ). Protein scores are derived from ions scores as a non-probabilistic basis for ranking protein hits.

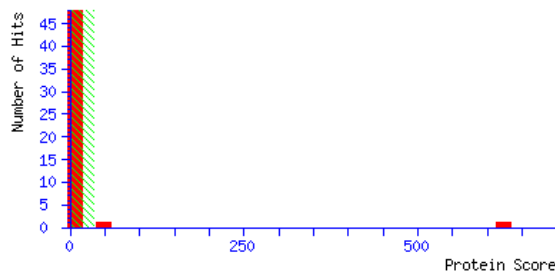

Matched peptide sequences: shown in **Bold Red**:

```
1  MASANALSSA  SILCSPNKGK  LRRKGNQRQN  QRVNYRQGN  RFGVKACAKE
51  IAFDQSSRAA  MQAGIDKLAD  AVGLTLGPRG  RNVVLDEFGS  PKVVNDGVTI
101 ARAIELPNAM  ENAGAALIRE  VASKTNSAG  DGTTTASVLA  REIIKLGLLT
151 VTSGANPVSV  KRGIDKTQVS  LIEELEKKAR  PVKGRDDIKA  VASISAGNDD
201 LIGTMVADAI  DKVGPDPVLS  IESSSSFETT  VDVEEGMEID  RGYISPQFVT
251 NPEKLICEFE  NARVLVTDQK  ITAIKDIIPL  LEKTTQLRAP  LLIIAEDVTG
301 EALATLVVNK  LRGILNVAAI  KAPSPFGERR  AVLQDIAILT  GAEFQANDLG
351 LLIENTSVEQ  LGIARKVIIT  KDSTQIIADA  ASKDEIQARV  QQLKKELAET
401 DSVYDTEKLA  ERIAKLSGGV  AVIKVGAATE  TELEDRLRI  EDAKNATFAA
451 IEEGIVPGGG  AALVHLSTCV  PAIKDKLEDP  EERIGADIVQ  KALVAPASLI
501 AQNAGMEGEV  VVEKVKNSEW  EIGYNAMTDT  YENLLAAGVI  DPAKVTRCAL
551 QNAASVAGMV  LTTQAIVVEK  AKPKAPAAAA  PEGLTI
```

Spot No.: **A9**

Protein name: **Chaperonin-60alpha**

Peptide sequences:

**K.EIAFDQSSR.A;K.LADAVGLTLGPR.G;R.AIELPNAMENAGAA  
LIR.E;R.GYISPQFVTNPEK.L;K.LICEFENAR.V;K.AVLQDIAILT  
GAEFQANDLGLLIENTSVEQLGIAR.;K.DSTQIIADAASKDEIQA  
R.V**

Accession No.: **Gohir.A13G232000.1.p**

Mascot score: **590**

Sequence coverage %: **19**

Calculated Mr: **62143**

Calculated pI: **5.15**

PFF Searched Score:

Ions score is  $-10 \cdot \log(P)$ , where P is the probability that the observed match is a random event. Individual ions scores  $> 34$  indicate identity or extensive homology ( $p < 0.05$ ). Protein scores are derived from ions scores as a non-probabilistic basis for ranking protein hits.

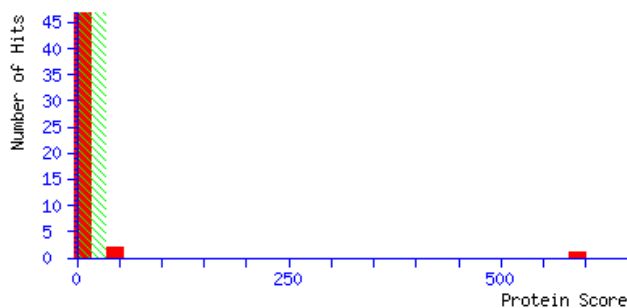

Matched peptide sequences: shown in **Bold Red**:

```
1 MASANALSSA SILCSPNKGS LRRKGNQRQN QRVNYRQGN RFGVKACAKE
51 IAFDQSSRAA MQAGIDKLAD AVGLTLGPRG RNVVLDFGS PKVVNDGVTI
101 ARAIELPNAM ENAGAALIRE VASKTNSAG DGTITASVLA REIIKLGILLT
151 VTSGANPVSV KRGIDKTQVS LIEELEKKAR PVKGRDDIKA VASISAGNDD
201 LIGTMVADAI DKVGPDGVLS IESSSSFETT VDVEEGMEID RGYISPQFVT
251 NPEKLICEFE NARVLVTDQK ITAIKDIIPL LEKTTQLRAP LLIIAEDVTG
301 EALATLVVNK LRGILNVAAI KAPSFERRK AVLQDIAILT GAEFQANDLG
351 LLIENTSVEQ LGIARKVIIT KDSTQIIADA ASKDEIQARV QQLKKELAET
401 DSVYDTEKLA ERIAKLSGGV AVIKVGAATE TELEDRLRI EDAKNATFAA
451 IEEGIVPGGG AALVHLSTCV PAIKDKLEDP EERIGADIVQ KALVAPASLI
501 AQNAGMEGEV VVEKVKNSEW EIGYNAMTDT YENLLAAGVI DPAKVTRCAL
551 QNAASVAGMV LTTQAIIVVEK AKPKAPAAAA PEGLTI
```



Spot No.: **A12**

Protein name: **Protein disulfide-isomerase**

Peptide sequences:

**K.VDANEESNKDLANEYEVR.G;K.LDATANDIMDPNFDVR.G;R.  
GYPTVYFR.S;R.SADGNISAYEGER.T**

Accession No.: **Gohir.D05G270900.1.p**

Mascot score: **162**

Sequence coverage %: **11**

Calculated Mr: **55800**

Calculated pI: **4.89**

PFF Searched Score:

Ions score is  $-10 \cdot \log(P)$ , where P is the probability that the observed match is a random event. Individual ions scores  $> 34$  indicate identity or extensive homology ( $p < 0.05$ ). Protein scores are derived from ions scores as a non-probabilistic basis for ranking protein hits.

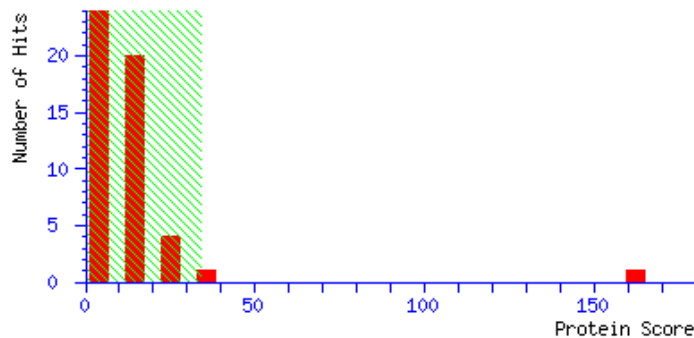

Matched peptide sequences: shown in **Bold Red**:

```
1 MGRIVSVWLA FAVIACSLTA ISAEESGESK EFVLTLDQSN FTDTVSKHDF
51 IVVEFYAPWC GHCKNLSPEY EKAASMLSKH DPPILLAKVD ANEESNKDLA
101 NEYEVRGFPT LKILRNGGKN VQEYKGPREA DGIVEYLKKQ SGPASAEIKS
151 AEDASSFIDE KKIVIVGVFP KFSGQEFDNY MALAEKLRSD YEFGHSLDAK
201 YLPRGGSSVT GPVVRLEKPF DELFVDFKDF NVEALEKFVE ESSIPLVTLF
251 NNDPSNHFPV IKFYNSPLVK AMLFANLSNE GVDLSLYKFR EVAEQYKGGQ
301 IGFLLDLEA SQAAFQYFGV QESQVPLIII LENDGKKYLK PNLEADHIAP
351 WVKDYKEGKV PPYVKSEPIP VENNEPVKVV VADTFDDMVV KSGKNVLEF
401 YAPWCGHCQK LAPILEEVAV HYENDAKVLI AKLDATANDI MDPNFDVRGY
451 PTVYFRSADG NISAYEGERT KEDIIDFIEK NREKTAHQEA LKDEL
```

Spot No.: **A13**

Protein name: **Chaperonin Cpn60/TCP-1 family**

Peptide sequences:

**K.SAENSLYVVEGMQFDR.G;R.GYISPYFVTDSEK.M;R.DLINIL  
EDAIR.S;K.AAVEEGIVVGGGCTLLR.L**

Accession No.: **Gohir.D10G200300.1.p**

Mascot score: **278**

Sequence coverage %: **9**

Calculated Mr: **64709**

Calculated pI: **5.72**

PFF Searched Score:

Ions score is  $-10 \cdot \log(P)$ , where P is the probability that the observed match is a random event. Individual ions scores  $> 34$  indicate identity or extensive homology ( $p < 0.05$ ). Protein scores are derived from ions scores as a non-probabilistic basis for ranking protein hits.

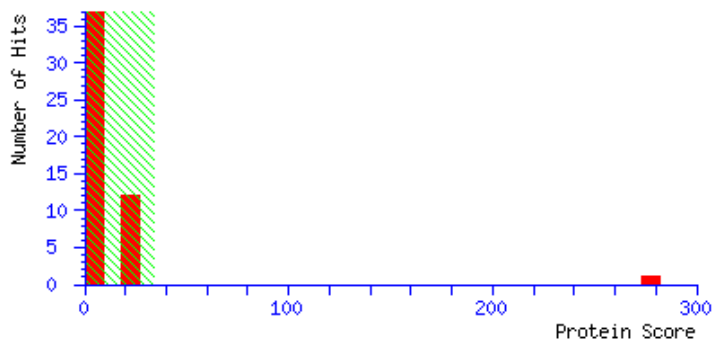

Matched peptide sequences: shown in **Bold Red**:

```
1 MASTFTAMSS VGSFVAPNGL VMDKKLSSSS NRLSSLASIS TSSFVSRNRV
51 VLRRSRLPKI SAAKELHFNK DGSAIKRLQT GVNKLADLVG VTLGPKGRNV
101 VLESKYGSPK IVNDGVTVAK EVELEDPVEN IGAKLVRQAA AKTNDLAGDG
151 TTTSVVLAQG LIAEGVKVVA AGANPVLITR GIEKTSRALV SELKAIKVEV
201 EDSELADVAA VSAGNNNEVG NMIAEAMSKV GRKGVVTLLE GKSAENSLYV
251 VEGMQFDRGY ISPYFVTDSE KMAVEYENCK LLLVDKKITN ARDLINILED
301 AIRSGYPILI IAEDIEQEAL ATLVVNKLRG ALKIAALKAP GFGERKSQYL
351 DDIAILTGGT VIRDEVGLSL DKASKEVLGH ASKVVLTKDT TTIVGDGSTQ
401 EAVNKRVVQI KNLIEAAEQD YEKEKLNRI AKLGGVAVI QVGAQTETEL
451 KEKKLRVEDA LNATKAAVEE GIVVGGGCTL LRLASKVDAI KDSLNDDEEK
501 VGADIVKRAL SYPLKLIKN AGVNGSVVSE KVLSDNDNPRY GFNAATGNYE
551 DLMSAGIIDP TKVVRCCLEH AASVAKTFLM SDCVVVEIKE PEPVPAGNPM
601 DNSGYGY
```



Spot No.: **A15**

Protein name: **Chaperonin Cpn60/TCP-1 family**

Peptide sequences:

**K.SAENSLYVVEGMQFDR.G;R.GYISPYFVTDSEK.M;R.DLINIL  
EDAIR.S;R.KSQYLDDIAILTGGTVIR.D;K.SQYLDDIAILTGGTV  
IRDEVGLSLDK.A;K.AAVEEGIVVGGGCTLLR.L**

Accession No.: **Gohir.D10G200300.1.p**

Mascot score: **469**

Sequence coverage %: **13**

Calculated Mr: **64709**

Calculated pI: **5.72**

PFF Searched Score:

Ions score is  $-10 \cdot \log(P)$ , where P is the probability that the observed match is a random event. Individual ions scores  $> 34$  indicate identity or extensive homology ( $p < 0.05$ ). Protein scores are derived from ions scores as a non-probabilistic basis for ranking protein hits.

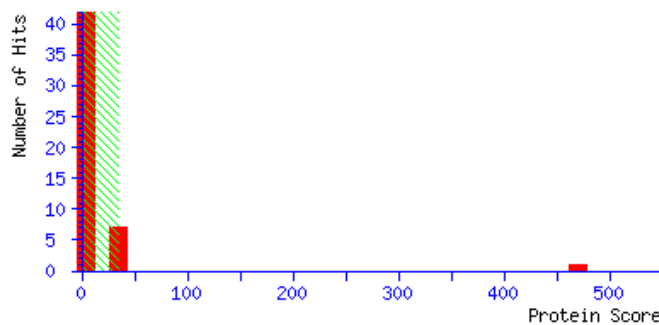

Matched peptide sequences: shown in **Bold Red**:

```
1 MASTFTAMSS VGSFVAPNGL VMDKKLSSSS NRLSSLASIS TSSEFVSRNV
51 VLRRSRLPKI SAAKELHFNK DGS AIKRLQT GVNKLADLVG VTLGPKGRNV
101 VLESKYGSPK IVNDGVTVAE EVELED PVEN IGAKLVRQAA AKTNDLAGDG
151 TTTSVVL AQG LIAEGVKVVA AGANPVLITR GIEKTSRALV SELKAIKVEV
201 EDSELADVAA VSAGNNNEVG NMIAEAMSKV GRKGVV TLEE GKSAENSLYV
251 VEGMQFDRGY ISPYFVTDSE KMAVEYENCK LLLVDKKITN ARDLINILED
301 AIRSGYPILI IAEDIEQEAL ATLVVNKLRG ALKIAALKAP GFGERKSQYL
351 DDIAILTGGT VIRDEVGLSL DKASKEVLGH ASKVVLTKDT TTIVGDGSTQ
401 EAVNKR VVQI KNLIEAAEQD YEKEKLNRI AKLSGGVAVI QVGAQTETEL
451 KEKCLRVEDA LNATKAAVEE GIVVGGGCTL LRLASKVDAI KDSLNDDEEK
501 VGADIVKRAL SYPLKLI AKN AGVNGSVVSE KVLSDNDNPRY GFNAATGNYE
551 DLMSAGIIDP TKVVRCCLEH AASVAKTFLM SDCVVVEIKE PEPVPAGNPM
601 DNSGYGY
```

Spot No.: **A17**

Protein name: **ATP synthase subunit beta**

Peptide sequences:

**K.GQDTAGQQINVTCEVQQLLGNRR.V;K.VVDLLAPYR.R;K.AHGGVSVFGGVGER.T;K.VALVYGQMNEPPGAR.M;R.VGLTAL TMAEYFR.D;R.DVNEQDVLLFIDNIFR.F;R.FVQAGSEVSALLG R.M**

Accession No.: **Gohir.A03G084900.1.p**

Mascot score: **653**

Sequence coverage %: **20%**

Calculated Mr: **53611**

Calculated pI: **5.22**

PFF Searched Score:

Ions score is  $-10 \cdot \log(P)$ , where P is the probability that the observed match is a random event. Individual ions scores  $> 34$  indicate identity or extensive homology ( $p < 0.05$ ). Protein scores are derived from ions scores as a non-probabilistic basis for ranking protein hits.

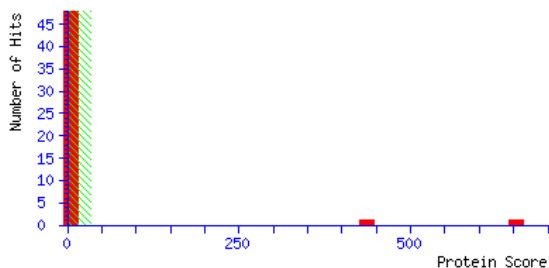

Matched peptide sequences: shown in **Bold Red**:

```
1 MKINPITSVP GWSTLEKENL GRISQIIGPV LDVAFFPGKM PNIYNALVVK
51 GQDTAGQQIN VICEVQQLLGNRRVRAVAMS ATDGLTRGME VIDTGAALSV
101 PVGGATLGRI FNVLGEFVDN LGPVDTRTTS PIHKSAPAFI QLDTKLSIFE
151 TGIKVVDLLA PYRRGGKIGL FGGAGVGKTV LIMELINNIA KAHGGVSVFG
201 GVGERTREGN DLYMEMKESG VINEQNLAES KVALVYGQMN EPPGARMRVG
251 LIALTMAEYF RDVNEQDVLL FIDNIFRFVQ AGSEVSALLG RMPSAVGYQP
301 TLSTEMGTLQ ERITSTKEGS ITSIQAVYVP ADDLTDPAFA TTFAPLDATT
351 VLSRGLAAKG IYPAVDPLDS TSTMLQPRIV GEEHYETAQR VKQTLQRYKE
401 LQDIIAILGL DELSEEDRLT VARARKIERF LSQPPFVAEV FTGSPGKYVG
451 LAETIRGFKL ILSGELDGLP EQAFYLVGNI DEATAKATNL EMESKLLK
```

Spot No.: **A20**

Protein name: **Ribulose biphosphate carboxylase**

Peptide sequences:

**K.GLAYDISDDQQDITR.G;K.MCALFINDLDAGAGR.M;R.VPIIV  
TGNDFSTLYAPLIR.D;K.FYWAPTR.D;K.LVDTFPGQSIDFFGAL  
R.A;K.LLEYGNMLVAEQENVKR.V;K.AAQQVGVPVPEGCTDP  
NADNFDPTAR.S**

Accession No.: **Gohir.A06G166200.1.p**

Mascot score: **707**

Sequence coverage %: **24**

Calculated Mr: **51953**

Calculated pI: **5.37**

PFF Searched Score:

Ions score is  $-10 \cdot \log(P)$ , where P is the probability that the observed match is a random event. Individual ions scores  $> 34$  indicate identity or extensive homology ( $p < 0.05$ ). Protein scores are derived from ions scores as a non-probabilistic basis for ranking protein hits.

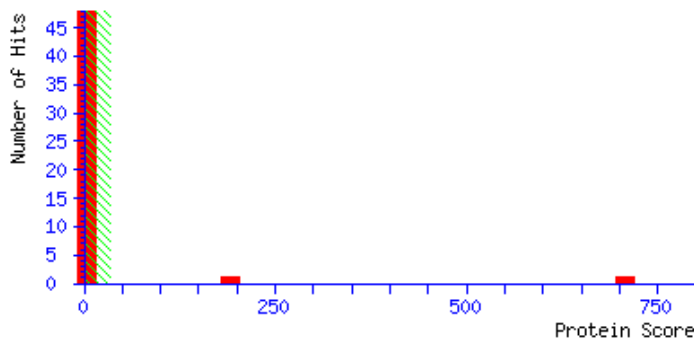

Matched peptide sequences: shown in **Bold Red**:

```
1 MAAAISTVAA AAAANRALGV SVPTSAFMGK KVSSRFNNTR QVPSGSFKVM
51 AAEKEIDEET QTEKDRWKGL AYDISDDQQD ITRGKGMVDS LFAQPMNDGT
101 HYAVMSSYEY ISQGLKTYNL DNNMDGFYIA PAFMDKLVVH ISKNFMSLPN
151 IKVPLILGIW GGKGQKSFQ CELVFAKMG I NPIMMSAGEL ESGNAGEPAK
201 LIRQRYREAA DIIKKGKMCA LFINDLDAGA GRMGGTTQYT VNNQMVNATL
251 MNIADNPTNV QLPGMYNKEE NPRVPIIVTG NDFSTLYAPL IRDGRMEKFY
301 WAPTRDDRIG VCKGIFRTDG VRDEDIVKLV DTFPGQSIDF FGALRARVYD
351 DEVRKWISEV GVASVGKLV NSREGPPTFE QPKMTIEKLL EYGNMLVAEQ
401 ENVKRVQLAD KYLSEAALGE ANEDSINRGT FYGKAAQQVG VVPVEGGCTDP
451 NADNFDPTAR SDDGICTYKF
```

Spot No.: **A21**

Protein name: **ATP synthase subunit alpha**

Peptide sequences:

**K.IVNTGTVLQVGDGIAR.I;K.IAQIPVSEAYLGR.V;R.LIESPAP  
GIISR.R;K.ASSVAQVVTTTFQER.G**

Accession No.: **Gohir.D01G031800.1.p**

Mascot score: **323**

Sequence coverage %: **10**

Calculated Mr: **55437**

Calculated pI: **5.25**

PFF Searched Score:

Ions score is  $-10 \cdot \log(P)$ , where P is the probability that the observed match is a random event. Individual ions scores  $> 34$  indicate identity or extensive homology ( $p < 0.05$ ). Protein scores are derived from ions scores as a non-probabilistic basis for ranking protein hits.

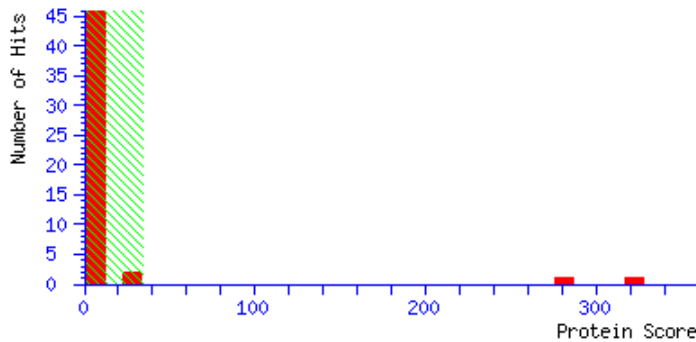

Matched peptide sequences: shown in **Bold Red**:

```
1 MVTIRADEIS NIIRERIEQY NREVKIVNTG TVLQVGDGIA RIHGLDEVMA
51 GELVEFEEGT IGIALNLESN NVGVVLMGDG LMIQEGSSVK ATGKIAQIPV
101 SEAYLGRVIN ALAKPIDGRG EISASESRLI ESPAPGIISR RSVYEPLQTG
151 LIAIDSMIPI GRGQRELIIG DRQTGKTAVA TDTILNQGGQ NVICVYVAIG
201 QKASSVAQVV TTFQERGAME YTIVVAETAD SPATLQYLAP YTGAAALAEYF
251 MYRERHTLII YDDLKQAQA YRQMSLLRR PPGREAYPGD VFYLHSRLLLE
301 RAAKSSSQLG EGSMTALPIV ETQSGDVSAY IPTNVISITD GQIFLSADLF
351 NAGIRPAINV GISVSRVGS AAIKAMKQVA GSKKLELAQF AELEAFAQFA
401 SLDLQATQNG LARGQLREL LKQSQSAPLT VAEQISTIYT GTNGYLDLSLE
451 IGQVRKFLVE LRTYLKTNKP QFQEIISSTK TFTEEAETLL KDAIQDQMER
501 FRLQEQL
```

Spot No.: **A22**

Protein name: **ATP synthase subunit alpha**

Peptide sequences:

**R.ADEISNIIR.E;K.IVNTGTVLQVGDGIAR.I;K.IAQIPVSEAYLG  
R.V;R.LIESPAPGIISR.R;R.SVYEPLQTGLIAIDSMIPIGR.G;K.AS  
SVAQVVTTFFQER.G;K.QSQSAPLTVAEQISTIYTGNGYLDLSLE  
IGQVR.K**

Accession No.: **Gohir.D01G031800.1.p**

Mascot score: **696**

Sequence coverage %: **23**

Calculated Mr: **55437**

Calculated pI: **5.25**

PFF Searched Score:

Ions score is  $-10 \cdot \log(P)$ , where P is the probability that the observed match is a random event.  
Individual ions scores > 34 indicate identity or extensive homology ( $p < 0.05$ ).  
Protein scores are derived from ions scores as a non-probabilistic basis for ranking protein hits.

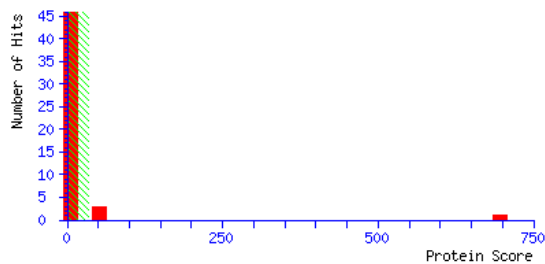

Matched peptide sequences: shown in **Bold Red**:

1 MVTIRADEIS NIIRERIEQY NREVKIVNTG TVLQVGDGIA RIHGLDEVMA  
51 GELVEFEEGT IGIALNLESN NVGVVLMGDG LMIQEGSSVK ATGKIAQIPV  
101 SEAYLGRVIN ALAKPIDGRG EISASESRLI ESPAPGIISR RSVYEPLQTG  
151 LIAIDSMIPI GRGQRELIIG DRQTGKTAVA TDTILNQQGQ NVICVYVAIG  
201 QKASSVAQVV TTFQERGAME YTIVVAETAD SPATLQYLAP YTGAAALAEYF  
251 MYRERHTLII YDDLKQQAQ YRQMSLLRR PPGREAYPGD VFYLSRLLLE  
301 RAAKSSSQLG EGSMTALPIV ETQSGDVSAY IPTNVISITD GQIFLSADLF  
351 NAGIRPAINV GISVSRVGS AAIKAMKQVA GKSKLELAQF AELEAFAQFA  
401 SDDLKATQNQ LARGQLREL LKQSQSAPLT VAEQISTIYTGNGYLDLSLE  
451 IGQVRKFLVE LRTYLKTNKP QFQEIISSTK TFTEEAETLL KDAIQDQMER  
501 FRLQEQL

Spot No.: **A23**

Protein name: **ATP synthase subunit alpha**

Peptide sequences:

**R.ADEISNIIR.E;K.IVNTGTVLQVGDGIAR.I;K.IAQIPVSEAYLG  
R.V;R.LIESPAPGIISR.R;R.SVYEPLQTGLIAIDSMIPIGR.G;K.AS  
SVAQVVTTTFQER.G**

Accession No.: **Gohir.D01G031800.1.p**

Mascot score: **432**

Sequence coverage %: **16**

Calculated Mr: **55437**

Calculated pI: **5.25**

PFF Searched Score:

Ions score is  $-10 \cdot \log(P)$ , where P is the probability that the observed match is a random event. Individual ions scores  $> 34$  indicate identity or extensive homology ( $p < 0.05$ ). Protein scores are derived from ions scores as a non-probabilistic basis for ranking protein hits.

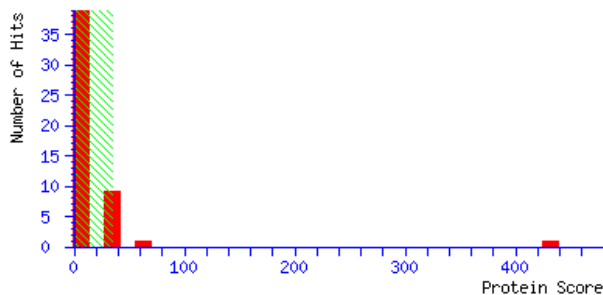

Matched peptide sequences: shown in **Bold Red**:

```
1 MVTIRADEIS NIIRERIEQY NREVKIVNTG TVLQVGDGIA RIHGLDEVMA
51 GELVEFEEGT IGIALNLESN NVGVVLMGDG LMIQEGSSVK ATGKIAQIPV
101 SEAYLGRVIN ALAKPIDGRG EISASESRLI ESPAPGIISR RSVYEPLQTG
151 LIAIDSMIPI GRGQRELIIG DRQTGKTAVA TDTILNQQGQ NVICVYVAIG
201 QKASSVAQVV TTFQERGAME YTIVVAETAD SPATLQYLAP YTGAAALAEYF
251 MYRERHTLII YDDLSKQQA YRQMSLLRR PPGREAYPGD VFYLHSRLLE
301 RAAKSSSQLG EGSMTALPIV ETQSGDVSAY IPTNVISITD GQIFLSADLF
351 NAGIRPAINV GISVSRVGS AQIKAMKQVA GKSKLELAQF AELEAFAQFA
401 SLDKATQNG LARGQLREL LKQSQSAPLT VAEQISTIIYT GTNGYLDLSLE
451 IGQVRKFLVE LRTYLKTNKP QFQEIISSTK TFTEEAETLL KDAIQDQMER
501 FRLQEQL
```



Spot No.: **A24**

Protein name: **ATP synthase subunit beta**

Peptide sequences:

**K.GQDTAGQQINVTCEVQQLLGNRR.V;R.GMEVIDTGAALSVP  
VGGATLGR.I;K.AHGGVSVFGGVGER.T;K.VALVYGQMNEPP  
GAR.M;R.VGLTALTMAEYFR.D;R.DVNEQDVLLFIDNIFR.F;R.F  
VQAGSEVSALLGR.M**

Accession No.: **Gohir.A03G084900.1.p**

Mascot score: **857**

Sequence coverage %: **23**

Calculated Mr: **53611**

Calculated pI: **5.22**

PFF Searched Score:

Ions score is  $-10 \cdot \log(P)$ , where P is the probability that the observed match is a random event. Individual ions scores  $> 34$  indicate identity or extensive homology ( $p < 0.05$ ). Protein scores are derived from ions scores as a non-probabilistic basis for ranking protein hits.

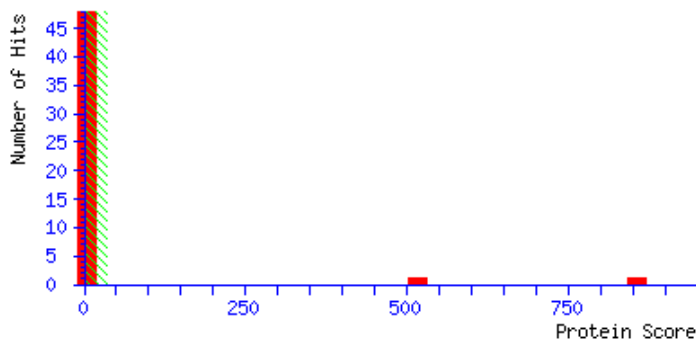

Matched peptide sequences: shown in **Bold Red**:

```
1  MKINPTTSVP  GVSTLEKENL  GRISQIIGPV  LDVAFPPGKM  PNIYNALVVK
51  GQDTAGQQIN VTCEVQQLG NNRVRAVAMS ATDGLTRGME VIDTGAALSV
101 PVGGATLGRI  FNVLGEPVDN  LGPVDTRTTS  PIHKSAPAFI  QLDTKLSIFE
151 TGIKVVDLLA  PYRRGGKIGL  FGGAGVGKTV  LIMELINNIA  KAHGGVSVFG
201 GVGERTREGN  DLYMEMKESG  VINEQNLAES  KVALVYGQMN  EPPGARMRVG
251 LTALTMAEYF RDVNEQDVLL FIDNIFRFVQ AGSEVSALLG  RMPSAVGYQP
301 TLSTEMGTLQ  ERITSTKEGS  ITSIQAVYVP  ADDLTDPAPE  TTFALHDATT
351 VLSRGLAAKG  IYPAVDPLDS  TSTMLQPRIV  GEEHYETAQR  VKQTLQRYKE
401 LQDIIAILGL  DELSEEDRLT  VARARKIERF  LSQPFVFAEV  FTGSPGKYVG
451 LAETIRGFKL  ILSGELDGLP  EQAFYLVGNI  DEATAKATNL  EMESKLLK
```

Spot No.: **B2**

Protein name: **ATP synthase subunit beta**

Peptide sequences:

**R.GMEVIDTGAALSVPVGGATLGR.I;K.VVDLLAPYR.R;K.AHG  
GVSVFGGVGER.T;K.VALVYQMQMNEPPGAR.M;R.VGLTALTM  
AEYFR.D;R.DVNEQDVLLFIDNIFR.F;R.FVQAGSEVSALLGR.M**

Accession No.: **Gohir.A03G084900.1.p**

Mascot score: **547**

Sequence coverage %: **20**

Calculated Mr: **53611**

Calculated *pI*: **5.22**

PFF Searched Score:

Ions score is  $-10 \cdot \log(P)$ , where P is the probability that the observed match is a random event. Individual ions scores  $> 34$  indicate identity or extensive homology ( $p < 0.05$ ). Protein scores are derived from ions scores as a non-probabilistic basis for ranking protein hits.

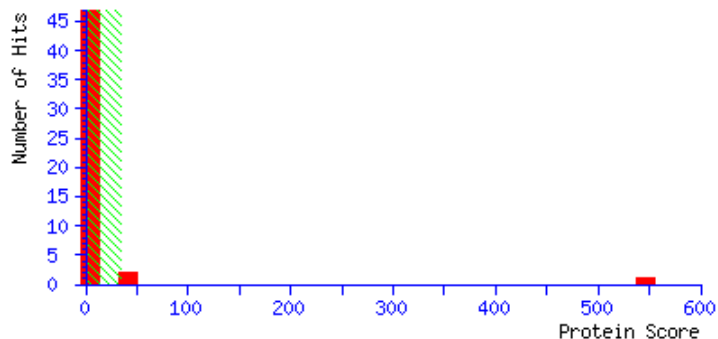

Matched peptide sequences: shown in **Bold Red**:

```
1 MKINPTTSVP GVSTLEKENL GRISQIIGPV LDVAFPPGKM PNIYNALVVK
51 QDGTAGQQIN VTCEVQQLLG NNRVRVAVMS ATDGLTRGME VIDTGAALSV
101 PVGGATLGRI FNVLGEPVDN LGPVDTRTTS PIHKSAPAFI QLDTKLSIFE
151 TGIKVVDLLA PYRRGGKIGL FGGAGVGKTV LIMELINNIA KAHGGVSVFG
201 GVGERTREGN DLYMEMKESG VINEQNLAES KVALVYQMN EPPGARMRVG
251 LTALTMAEYF RDVNEQDVLL FIDNIFRFVQ AGSEVSALLG RMPSAVGYQP
301 TLSTEMGTLQ ERITSTKEGS ITSIAQAVYVP ADDLTDPAFA TTF AHLDATT
351 VLSRGLAAGK IYPAVDPLDS TSTMLQPRIV GEEHYETAQR VKQTLQRYKE
401 LQDIIAILGL DELSEEDRLT VARARKIERF LSQPFVFAEV FTGSPGKYVG
451 LAETIRGFKL ILSGELDGLP EQAFYLVGNI DEATAKATNL EMESKLLK
```

Spot No.: **B3**

Protein name: **tubulin alpha-3**

Peptide sequences:

**R.AVFVDLEPTVIDEVR.T;R.LISQTISSLTTSR.F;R.FDGAINVD  
ITEFQTNLVPYPR.I;R.AVCMISNNTAVAEVFAE.I;R.AFVHWYV  
GEGMEEGEFSEAR.E**

Accession No.: **Gohir.A11G076100.1**

Mascot score: **369**

Sequence coverage %: **19**

Calculated Mr: **50264**

Calculated pI: **5.01**

PFF Searched Score:

Ions score is  $-10 \cdot \log(P)$ , where P is the probability that the observed match is a random event. Individual ions scores  $> 33$  indicate identity or extensive homology ( $p < 0.05$ ). Protein scores are derived from ions scores as a non-probabilistic basis for ranking protein hits.

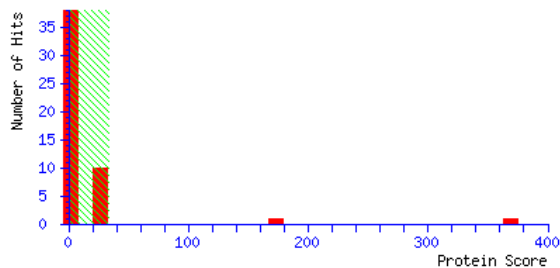

Matched peptide sequences: shown in **Bold Red**:

```
1 MREIISVHIG QAGIQVGNCS WELYCLEHVI HPDGTMPSDT SMGVAHDAFN
51 TFFSETGSGK HVPRAVFVDL EPTVIDEVRT GPYRQLFHPE QLISGKEDAA
101 NNFARGHYTI GKEIVDLCLD RVRKLADNCT GLQGFVMVFA VGGGTGSGLG
151 SLLLERLSVD YGKSKLGFT IYSPQVSTA VVEPYNSVLS THSLEHTDV
201 AVLLDNEAIY DICRRSLDIE RPYTNLNRL ISQTISSLIT SLRFDGAINV
251 DITEFQTNLV PYPRIHFMLS SYAPVISA EK AYHEQISWPE ITNAVFEPSS
301 MMAKCDPRHG KYMACCLMYR GDVVPKDVNA AVATIKTKRT VQFVDWCPTG
351 FKCGINYQPP AVVPGDLAK VQRAVCMISN NTAVAEVFAE IDHKFDLMYS
401 KRAFVHWYVG EGMEEGEFSE AREDLAALEK DYEEVGAEGG DDEEEGEEY
```

Spot No.: **B4**

Protein name: **Ribulose biphosphate carboxylase**

Peptide sequences:

**K.GLAYDISDDQQDITR.G;K.MCALFINDLDAGAGR.M;R.VPIIV  
TGNDFSTLYAPLIR.D;K.FYWAPTR.D;K.LVDTFPGQSIDFFGAL  
R.A;K.LLEYGNMLVAEQENVKR.V**

Accession No.: **Gohir.A06G166200.1.p**

Mascot score: **604**

Sequence coverage %:**19**

Calculated Mr: **51953**

Calculated *pI*: **5.37**

PFF Searched Score:

Ions score is  $-10 \cdot \log(P)$ , where P is the probability that the observed match is a random event. Individual ions scores  $> 34$  indicate identity or extensive homology ( $p < 0.05$ ). Protein scores are derived from ions scores as a non-probabilistic basis for ranking protein hits.

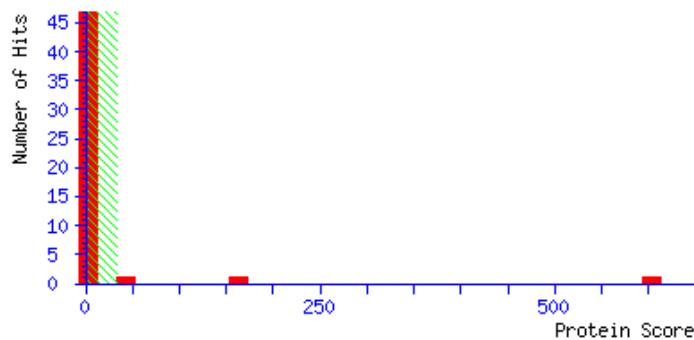

Matched peptide sequences: shown in **Bold Red**:

```
1 MAAAISTVAA AAAANRALGV SVPTSAFMGK KVSSRFNNTR QVPSGSFKVM
51 AAEKEIDEET QTEKDRWKGL AYDISDDQQD ITRGKGMVDS LFQAPMNDGT
101 HYAVMSSYEY ISQGLKTYNL DNNMDGFYIA PAFMDKLVVH ISKNFMSLPN
151 IKVPLILGIW GGKGQKSFQ CELVFAKMG I NPIMMSAGEL ESGNAGEPAK
201 LIRQRYREAA DIIKKGKMCA LFINDLDAGA GRMGTTQYT VNNQMVNATL
251 MNIADNPTNV QLPGMYNKEE NPRVPIIVTG NDFSTLYAPL IRDGRMEKFY
301 WAPTRDDRIG VCKGIFRTDG VRDEDIVKLV DTFPGQSIDF FGALRARVYD
351 DEVRKWISEV GVASVGKLV NSREGPPTFE QPKMTIEKLL EYGNMLVAEQ
401 ENVKRVQLAD KYLSEAALGE ANEDSINRGT FYGKAAQQVG VVPEGCTDP
451 NADNFDPTAR SDDGTCTYKF
```

**Spot No.: B5**

**Protein name: Ribulose biphosphate carboxylase**

**Peptide sequences:**

**K.GLAYDISDDQDITR.G;K.MCALFINDLDAGAGR.M;R.VPIIV  
TGNDFSTLYAPLIR.D;K.FYWAPTR.D;K.LVDTFPGQSIDFFGAL  
R.A;K.LLEYGNMLVAEQENVKR.V**

**Accession No.: Gohir.D06G171700.1**

**Mascot score: 804**

**Sequence coverage %:24**

**Calculated Mr: 51953**

**Calculated pI: 5.37**

**PFF Searched Score:**

Ions score is  $-10 \cdot \log(P)$ , where P is the probability that the observed match is a random event. Individual ions scores  $> 34$  indicate identity or extensive homology ( $p < 0.05$ ). Protein scores are derived from ions scores as a non-probabilistic basis for ranking protein hits.

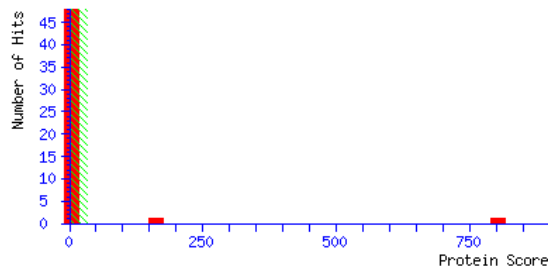

**Matched peptide sequences: shown in Bold Red:**

```
1 MAAAISTVAA AAAANRALGV SVPTSAFMGK KVSSRFNNTR QVPSGSFKVM
51 AAEKEIDEET QTEKDRWKGL AYDISDDQQD ITRGKGMVDS LFQAPMNDGT
101 HYAVMSSY EY ISQGLKTYNL DNNMDGFYIA PAFMDKLVVH ISKNFMSLPN
151 IKVPLILGIW GKGQKSFQ CELVFAKMG I NPIMMSAGEL ESGNAGEPAK
201 LIRQRYREAA DIIKKGKMCA LFINDLDAGA GRMGGTTQYT VNNQMVNATL
251 MNIADNPTNV QLPGMYNKEE NPRVPIIVIG NDFSTLYAPL IRDGRMEKFY
301 WAPTRDDRIG VCKGIFRTDG VRDEDIVKLV DTFPGQSIDF FGALRARVYD
351 DEVRKWISEV GVASVGKKLV NSREGPPTFE QPKMTIEKLL EYGNMLVAEQ
401 ENVKRVQLAD KYLSEAALGE ANEDSINRG T FYGAAQQVG VPVPEGCTDP
451 NADNFDPTAR SDDGTCTYKF
```

Spot No.: **B6**

Protein name: **Rubisco activase**

Peptide sequences:

**K.GLAYDISDDQQDITR.G;R.VPIIVTGNDSTLYAPLIR.D;K.FY  
WAPTR.E;R.IGVCTGIFR.T;K.LVDTFPGQSIDFFGALR.A;K.YLS  
EAALGNANDDAIKR.G**

Accession No.: **Gohir.A10G221700.1.p**

Mascot score: **476**

Sequence coverage %:**19**

Calculated Mr: **48189**

Calculated pI: **5.40**

PFF Searched Score:

Ions score is  $-10 \cdot \log(P)$ , where P is the probability that the observed match is a random event. Individual ions scores  $> 34$  indicate identity or extensive homology ( $p < 0.05$ ). Protein scores are derived from ions scores as a non-probabilistic basis for ranking protein hits.

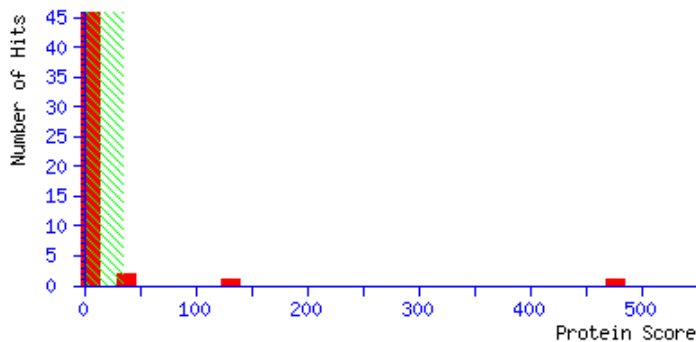

Matched peptide sequences: shown in **Bold Red**:

```
1  MAAAVSTIGA VNRAPLSLNG SGAGASAPSS AFMGNSLKKV SARFNNNGKA
51  PVGSFMIVAA KEIDEDTQTD QDRWKGLAYD ISDDQQDITR GKGMVDSLQ
101 APMNDGTHYA VMSSYEYISQ GLRTYDLNND MDGFYIAPAF MDKLVVHITK
151 NYMTLPNIKV PLILGIWGGK GQGKSFQCEL VFAKMGINPI MMSAGELESG
201 NAGEPAKLIR QRYREAAII KKGKMCCLFI NDLDAGAGRM GGTTQYTVNN
251 QMVNATLMNI ADNPTNVQLP GMYNKEENPR VPIIVTGNDF STLYAPLIRD
301 GRMEKFYWAP TREDRIGVCT GIFRTDNVPV DDIVKLVDTF PGQSIDFFGA
351 LRARVYDDEV RKWIGEVGVN SVGKKLVNSR EGPPSFEQPT MTIEKLLEYG
401 NMLVAEQENV KRVQLADKYL SEAALGNAND DAIKRGAF
```



Spot No.: B7

Protein name: Ribulose biphosphate carboxylase

Peptide sequences:

K.GLAYDISDDQQDITR.G;K.MCALFINDLDAGAGR.M;R.VPIIV  
TGNDFSTLYAPLIR.D;K.FYWAPTR.D;K.LVDTFPGQSIDFFGAL  
R.A;K.LLEYGNMLVAEQENVKR.V;K.AAQQVGVVPVEGCTDP  
NADNFDPTAR.S

Accession No.: Gohir.A06G166200.1.p

Mascot score: 849

Sequence coverage %:24

Calculated Mr: 51953

Calculated pI: 5.37

PFF Searched Score:

Ions score is  $-10 \cdot \log(P)$ , where P is the probability that the observed match is a random event. Individual ions scores  $> 34$  indicate identity or extensive homology ( $p < 0.05$ ). Protein scores are derived from ions scores as a non-probabilistic basis for ranking protein hits.

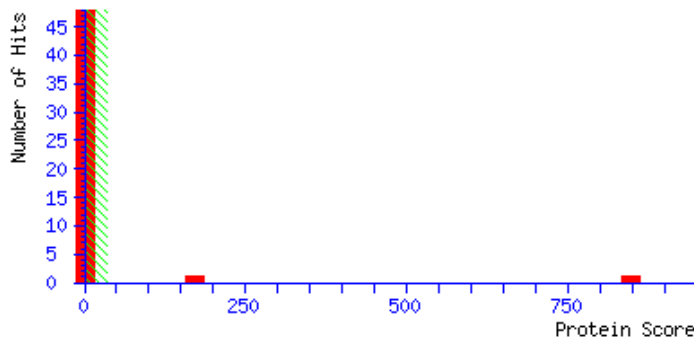

Matched peptide sequences: shown in **Bold Red**:

```
1 MAAAISTVAA AAAANRALGV SVPTSAFMGK KVSSRFNNTR QVPSGSFKVM
51 AAEKEIDEET QTEKDRWKGL AYDISDDQQD ITRGKGMVDS LfqAPMNDGT
101 HYAVMSSYEY ISQGLKTYNL DNNMDGFYIA PAFMDKLVVH ISKNFMSLPN
151 IKVPLILGIW GGKGQGSFQ CELVFAKMG I NPIMMSAGEL ESGNAGEPAK
201 LIRQRYREAA DIIKKGKMCA LFINDLDAGA GRMGTTQYT VNNQMVNATL
251 MNIADNPTNV QLPGMYNKEE NPRVPIIVTG NDFSTLYAPL IRDGRMEKFY
301 WAPTRDDRIG VCKGIFRTDG VRDEDIVKLV DTFPGQSIDF FGALRARVYD
351 DEVRKWISEV GVASVGKKLV NSREGPPTFE QPKMTIEKLL EYGNMLVAEQ
401 ENVKRVQLAD KYLSEAALGE ANEDSINRGT FYGKAAQQVG VPVPEGCTDP
451 NADNFDPTAR SDDGTCTYKF
```

Spot No.: **B8**

Protein name: **Ribulose biphosphate carboxylase**

Peptide sequences:

**K.GLAYDISDDQQDITR.G;K.MCALFINDLDAGAGR.M;R.VPIIV  
TGNDFSTLYAPLIR.D;K.FYWAPTR.D;K.LVDTFPGQSIDFFGAL  
R.A;K.LLEYGNMLVAEQENVKR.V;K.AAQQVGVPVPEGCTDP  
NADNFDPTAR.S**

Accession No.: **Gohir.A06G166200.1.p**

Mascot score: **819**

Sequence coverage %:**24**

Calculated Mr: **51953**

Calculated pI: **5.37**

PFF Searched Score:

Ions score is  $-10 \cdot \log(P)$ , where P is the probability that the observed match is a random event. Individual ions scores  $> 34$  indicate identity or extensive homology ( $p < 0.05$ ). Protein scores are derived from ions scores as a non-probabilistic basis for ranking protein hits.

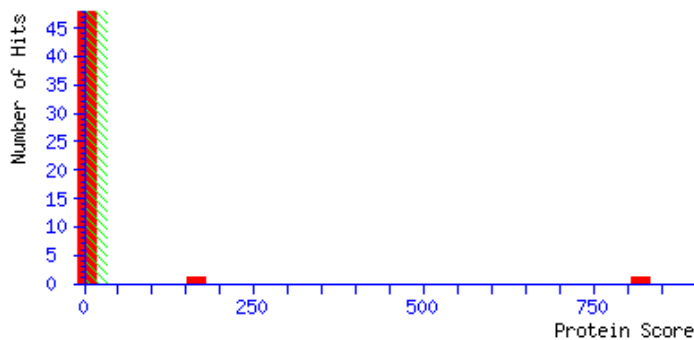

Matched peptide sequences: shown in **Bold Red**:

```
1 MAAAISTVAA AAAANRALGV SVPTSAFMGK KVSSRFNNTR QVPSGSFKVM
51 AAEKEIDEET QTEKDRWKGL AYDISDDQQD ITRGKGMVDS LFAQPMNDGT
101 HYAVMSSYEY ISQGLKTYNL DNNMDGFYIA PAFMDKLVVH ISKNFMSLPN
151 IKVPLILGIW GKGQKGSFQ CELVFAKMG I NPIMMSAGEL ESGNAGEPAK
201 LIRQRYREAA DIIKKGKMCA LFINDLDAGA GRMGTTQYT VNNQMVNATL
251 MNIADNPTNV QLPGMYNKEE NPRVPIIVTG NDFSTLYAPL IRDGRMEKFY
301 WAPTRDDRIG VCKGIFRTDG VRDEDIVKLV DTFPGQSIDF FGALRARVYD
351 DEVRKWISEV GVASVGKMLV NSREGPPTFE QPKMTIEKLL EYGNMLVAEQ
401 ENVKRVQLAD KYLSEAALGE ANEDSINRGT FYGAAQQVG VPVPEGCTDP
451 NADNFDPTAR SDDGTCTYKF
```

Spot No.: **B10**

Protein name: **S-adenosylmethionine synthetase 2**

Peptide sequences:

**K.VLVNIEQQSPDIAQGVHGHFTK.R;K.TIFHLNPSGR.F;R.FVIG  
GPHGDAGLTGR.K**

Accession No.: **Gohir.D07G135100.1.p**

Mascot score: **144**

Sequence coverage %:**11**

Calculated Mr: **43468**

Calculated pI: **5.49**

PFF Searched Score:

Ions score is  $-10 \cdot \log(P)$ , where P is the probability that the observed match is a random event. Individual ions scores  $> 34$  indicate identity or extensive homology ( $p < 0.05$ ). Protein scores are derived from ions scores as a non-probabilistic basis for ranking protein hits.

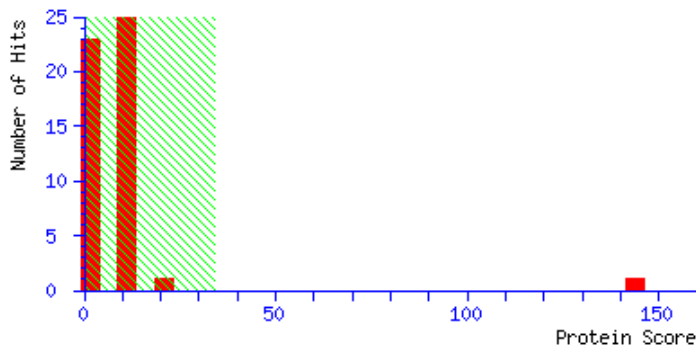

Matched peptide sequences: shown in **Bold Red**:

```
1 METFLFTSES VNEGHPDKLC DQISDAVLDA CLAQDPDSKV ACETCSKTNM
51 VMVFGEITTK ANVDYEKIVR DTCRNIGFVS DDVGLDADNC KVLVNIEQQS
101 PDIAQGVHGH FTKRPEDIGA GDQGHMFGYA TDETPFEMPL SHVLATKLGA
151 RLTEVRKNGT CPWLRPDGKT QVTVEYYDDN GAMVPVRVHT VLISTQHDET
201 VTNDEIAADL KEHVIKPVIP EKYLDGKTIF HLNPSGRFVI GGPHGDAGLT
251 GRKIIIDTYG GWGAHGGGAF SGKDPTKVDR SGAYIVRQAA KSIVANGLAR
301 RCLVQVSYAI GVPEPLSVFV NSYGTGKIPD KEILQIVKEN FDFRPGMITI
351 DLDLKRGGNG RFLKTAAYGH FGRDDPDFTW EVVKPLKWEK PQS
```

Spot No.: **B17**

Protein name: **Actin 7**

Peptide sequences:

**R.AVFPSIVGR.P;R.AVFPSIVGRPR.H;K.IWHHTFYNELR.V;R.V  
APEEHPVLLTEAPLNPK.A;K.NYELPDGQVITIGAER.F**

Accession No.: **Gohir.A03G105800.1.p**

Mascot score: **389**

Sequence coverage %:**14**

Calculated Mr: **41913**

Calculated pI: **5.31**

**PFF Searched Score:**

Ions score is  $-10 \cdot \log(P)$ , where P is the probability that the observed match is a random event. Individual ions scores  $> 35$  indicate identity or extensive homology ( $p < 0.05$ ). Protein scores are derived from ions scores as a non-probabilistic basis for ranking protein hits.

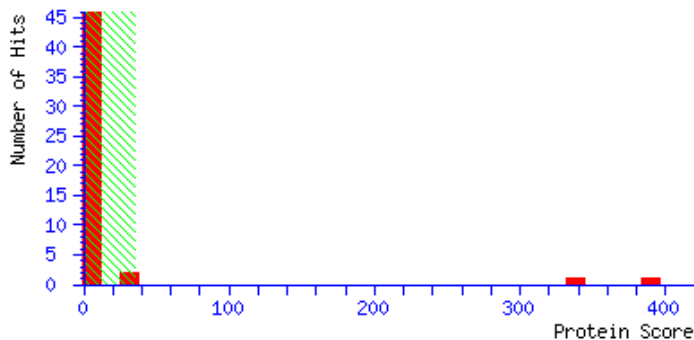

**Matched peptide sequences: shown in Bold Red:**

```
1 MADAEDIQPL VCDNGTGMVK AGFAGDDAPR AVFPSIVGRP RHTGVMVGMG
51 QKDAYVGDEA QSKRGILTLK YPIEHGIVSN WDDMEKIWHH TFYNELRVAP
101 EEHPVLLTEA PLNPKANREK MTQIMFETFN VPAMYVAIQV VLSLYASGRT
151 TGIVLDSDGD VSHTVPIYEG YALPHAILRL DLAGRDLTDS LMKILTERGY
201 MFTTTAEREI VRDMKEKLAY VALDYEQELE TAKSSSSVEK NYELPDGQVI
251 TIGAERFRCP EVLFQPSLIG MEAAGIHETT YNSIMKCDVD IRKDLYGNIV
301 LSGGSTMFPG IADRMSKEIT ALAPSSMKIK VVAPPERKYS VWIGGSILAS
351 LSTFQQMWIS KGEYDESGPS IVHRKCF
```

Spot No.: **B18**

Protein name: **RAB GTPase homolog E1B**

Peptide sequences:

**K.KYDEIDAAPEER.A;R.GITINTATVEYETENR.H;R.QTDLPFL  
LAVEDVFSITGR.G**

Accession No.: **Gohir.A03G057300.1.p**

Mascot score: **158**

Sequence coverage %: **9**

Calculated Mr: **52793**

Calculated pI: **6.21**

PFF Searched Score:

Ions score is  $-10 \cdot \log(P)$ , where P is the probability that the observed match is a random event. Individual ions scores  $> 34$  indicate identity or extensive homology ( $p < 0.05$ ). Protein scores are derived from ions scores as a non-probabilistic basis for ranking protein hits.

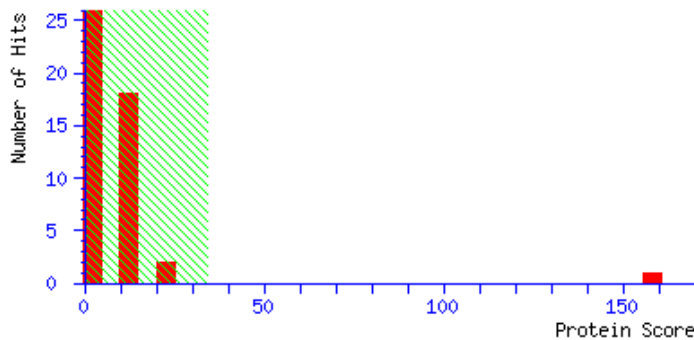

Matched peptide sequences: shown in **Bold Red**:

```
1 MAISSTAAAT AASSKLRYPH ASPFPTHSST TTSAFFSSIP SKLTPHLSS
51 SFLPPFLTIV ATTYVFPRRR DSFTVKAARG KFERKKPHVN IGTIGHVDHG
101 KTTTLTAALTM ALASMGNSAP KKYDEIDAAP EERARGITIN TATVEYETEN
151 RHYAHVDCPG HADYVKNMIT GAAQMDGAIL VVSGADGMP QTKEHILLAK
201 QVGVPNVVVF LNKQDQVDDE ELLQLVELEV RELSSYEFP GDDVPIISGS
251 ALLALEALMA KPSIPRGENQ WVDKIYELMD AVDSYIPVPQ RQTDLPFLLA
301 VEDVFSITGR GTVATGRIER GTVKVGETVD IVGLKDTRNV TVTGVEMFQK
351 TLDDAMAGDN VGLLLRGVQK ADIQRGMVLA KPGTITPHTK FSAIVYVLKK
401 EEGGRHSPFF AGYRPFYMR TTDVTGRVAS IMNDKDEESK MVMPGDRVKM
451 VVELIMPVAC EQGMRFAIRE GGKTVGAGVI QSIIE
```

Spot No.: **B19**

Protein name: **Glutamine synthetase**

Peptide sequences:

**K.WNYDGSSTGQAPGEDSEVILYPQAIKDPFR.G;R.GGNNILVICDAYTPAGEPIPTNKR.H;R.HKEHISAYGEGNER.R;K.HETASINTFSWGVANR.G;R.RPASNMDPYVVTALLAETTLLYEPTLEAEALAAQK.I**

Accession No.: **Gohir.D02G032300.1.p**

Mascot score: **426**

Sequence coverage %: **27**

Calculated Mr: **47707**

Calculated pI: **7.08**

PFF Searched Score:

Ions score is  $-10 \cdot \log(P)$ , where P is the probability that the observed match is a random event. Individual ions scores  $> 34$  indicate identity or extensive homology ( $p < 0.05$ ). Protein scores are derived from ions scores as a non-probabilistic basis for ranking protein hits.

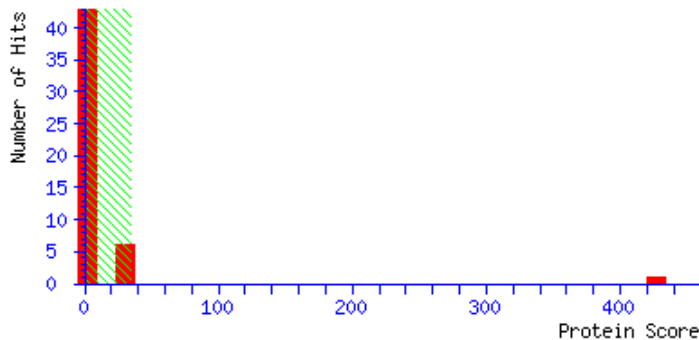

Matched peptide sequences: shown in **Bold Red**:

```
1 MAQLLAPSTQ WQMTLPKTST YGSPIATKMW SSLVLKQNKK GAAKSSGKFK
51 VVALSENSTV NRLENLLNMD VTPYTDKIIA EYVWIGGSGL DMRSKSRITIS
101 KPVKHPSELP KWNYDGSSTG QAPGEDSEVI LYPQAIKDP FRGGNNILVI
151 CDAYTPAGEP IPTNKRHRAA EIFSNKKVVD EVPWFGIEQE YTLLQQNVKW
201 PLGWPGWGYG GPQGPYYCAA GADKSFGRDI SDAHAKACLY AGINISGTNG
251 EVMPGQWEYQ VGPSVGIEAG DHIWCSRYIL ERITEQAGVV LSLDPKPIEG
301 DWNGAGCHTN YSTKSMREDG GFEVIKKAIL NLSLRHKEHI SAYGEGNERR
351 LTGKHETASI NTFSWGVANR GCSIRVGRDT EKNGKGYLED RRPASNMDPY
401 VVTALLAETT LLYEPTLEAE ALAAQKIALN V
```



Spot No.: **B20**

Protein name: **Rubisco activase**

Peptide sequences:

**K.GLAYDISDDQQDITR.G;R.VPIIVTGNDFSTLYAPLIR.D;K.FY  
WAPTR.E;R.IGVCTGIFR.T;K.LVDTFPGQSIDFFGALR.A;K.YLS  
EAALGNANDDAIKR.G**

Accession No.: **Gohir.A10G221700.1.p**

Mascot score: **523**

Sequence coverage %: **19**

Calculated Mr: **48189**

Calculated pI: **5.40**

PFF Searched Score:

Ions score is  $-10 \cdot \log(P)$ , where P is the probability that the observed match is a random event. Individual ions scores  $> 34$  indicate identity or extensive homology ( $p < 0.05$ ). Protein scores are derived from ions scores as a non-probabilistic basis for ranking protein hits.

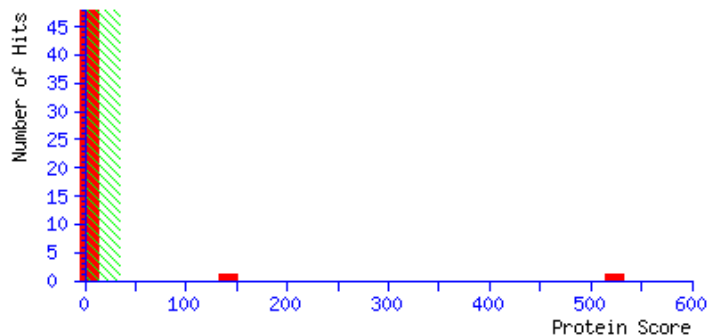

Matched peptide sequences: shown in **Bold Red**:

```
1 MAAAVSTIGA VNRAPLSLNG SGAGASAPSS AFMGNSLKKV SARFNNNGKA
51 PVGSFMIVAA KEIDEDTQTD QDRWKGLAYD ISDDQQDITR GKGMVDSLQ
101 APMNDGTHYA VMSSYEYISQ GLRTYDLNND MDGFYIAPAF MDKLVVHITK
151 NYMTLPNIKV PLILGIWGGK GQGKSFQCEL VFAKMGINPI MMSAGELESG
201 NAGEPAKLIR QRYREAADII KKGKMCCLFI NDLDAGAGRM GGTTQYTVNN
251 QMVNATLMNI ADNPTNVQLP GMYNKEENPR VPIIVTGNDF STLYAPLIRD
301 GRMEKFYWAP TREDRIGVCT GIFRTDNPV DDIVKLVDTF PGQSIDFFGA
351 LRARVYDDEV RKWIGEVGVN SVGKKLVNSR EGPPSFEQPT MTIEKLLEYG
401 NMLVAEQENV KRVQLADKYL SEAALGNAND DAIKRGAF
```

Spot No.: **B22**

Protein name: **Rubisco activase**

Peptide sequences:

**K.MCCLFINDLDAGAGR.M;R.VPIIVTGNDFSTLYAPLIR.D;K.FYWAPTR.E;R.IGVCTGIFR.T;K.LVDTFPGQSIDFFGALR.A**

Accession No.: **Gohir.A10G221700.1.p**

Mascot score: **491**

Sequence coverage %: **15**

Calculated Mr: **48189**

Calculated pI: **5.40**

PFF Searched Score:

Ions score is  $-10 \cdot \log(P)$ , where P is the probability that the observed match is a random event. Individual ions scores  $> 35$  indicate identity or extensive homology ( $p < 0.05$ ). Protein scores are derived from ions scores as a non-probabilistic basis for ranking protein hits.

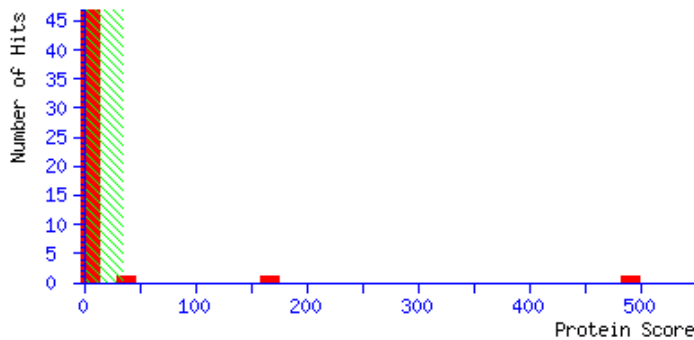

Matched peptide sequences: shown in **Bold Red**:

```
1 MAAAVSTIGA VNRAPLSLNG SGAGASAPSS AFMGNSLKKV SARFNNNGKA
51 PVGSFMIVAA KEIDEDTQTD QDRWKGLAYD ISDDQQDITR GKGMVDSLFO
101 APMNDGTHYA VMSSYEYISQ GLRTYDLNND MDGFYIAPAF MDKLVVHITK
151 NYMTLPNIKV PLILGIWGGK GQGKSFQCEL VFAKMGINPI MMSAGELESG
201 NAGEPAKLIR QRYREAADII KKGKMCCLFI NLDAGAGRM GGTTQYTVNN
251 QMVNATLMNI ADNPTNVQLP GMYNKEENPR VPIIVTGNDF STLYAPLIRD
301 GRMEKFYWAP TREDRIGVCT GIFRTDNVPV DDIVKLVDTF PGQSIDFFGA
351 LRARVYDDEV RKWIGEVGVN SVGKKLVNSR EGPPSFEQPT MTIEKLLEYG
401 NMLVAEQENV KRVQLADKYL SEALGNAND DAIKRGAF
```

Spot No.: C2

Protein name: Phosphoribulokinase

Peptide sequences:

**K**.ILVIEGLHPMFDER.V;**R**.VRDLLDFSIYLDISNEVK.F;**K**.HFSP  
VYLFDEGSTISWIPCGR.K;**R**.LDELIYVESHLSNISTR.F;**K**.IRDL  
YEQITSSK.T

Accession No.: Gohir.A12G204600.1.p

Mascot score: 532

Sequence coverage %:20

Calculated Mr: 45621

Calculated pI: 6.14

PFF Searched Score:

Ions score is  $-10 \cdot \log(P)$ , where P is the probability that the observed match is a random event. Individual ions scores  $> 34$  indicate identity or extensive homology ( $p < 0.05$ ). Protein scores are derived from ions scores as a non-probabilistic basis for ranking protein hits.

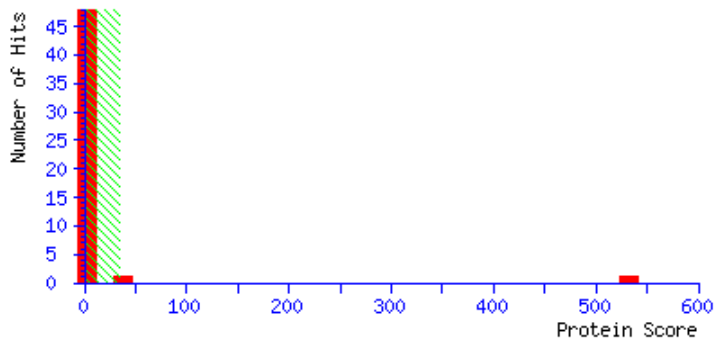

Matched peptide sequences: shown in **Bold Red**:

```
1 MAVCSAYTTQ SLHSTCSIST PAKTHLGFHQ KQVVFYRRSS KRGGSGSSSG
51 PCVITCSAGD SQTVVIGLAA DSGCGKSTFM RRLTSVFGGA AEPPKGGNPD
101 SNTLISDMTT VICLDDYHSL DRTGRKEKGV TALDPRANDF DLMYEQVKAI
151 KSGVAVDKPI YNHVTGLLDP PELIKPPKIL VIEGLHPMFD ERVRDLLDFS
201 IYLDISNEVK FAWKIQRDMA ERGHSLESIR ASIEARKPDF DAYIDPQKKY
251 ADAVIEVLPT QLIPDDNEGK VLRVRLIMKE GVKHFSPVYL FDEGSTISWI
301 PCGRKLTCSY PGIKFHYGPD TYFGNEVSIL EMDGQFDRLD ELIYVESHLS
351 NISTRFYGEV TQQMLKHADF PGSNNGTGLF QTIVGLKIRD LYEQITSSKT
401 AAPLEATKA
```

Spot No.: C3

Protein name: Phosphoribulokinase

Peptide sequences:

R.ANDFDLMYEQVK.A;K.ILVIEGLHPMFDER.V;R.VRDLLDFSI  
YLDISNEVK.F;R.DLLDFSIYLDISNEVK.F;K.EGVEHFSPVYLF  
EGSTISWIPCGR.K;K.IRDLYEQITASK.T

Accession No.: Gohir.D03G177400.1.p

Mascot score: 331

Sequence coverage %: 19

Calculated Mr: 45591

Calculated pI: 5.96

PFF Searched Score:

Ions score is  $-10 \cdot \log(P)$ , where P is the probability that the observed match is a random event. Individual ions scores  $> 34$  indicate identity or extensive homology ( $p < 0.05$ ). Protein scores are derived from ions scores as a non-probabilistic basis for ranking protein hits.

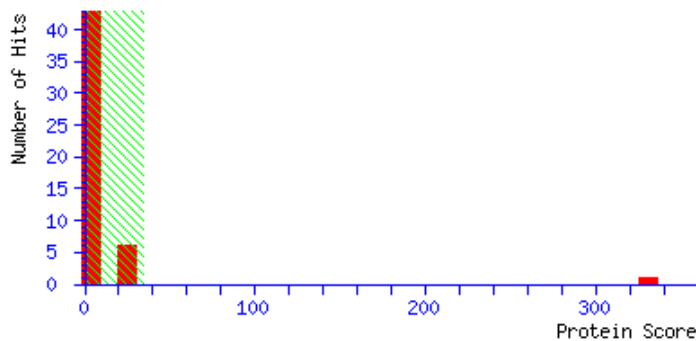

Matched peptide sequences: shown in **Bold Red**:

```
1 MAVCPVYTTQ SLNSTCSIST PSKTHFSSH NHLVFYRTSK RTSKRGGSSS
51 CVITCSAGDS QTVVIGLAAD SGC GKSTFMR RLTSVFGGAA EPPKGGNPDS
101 NTLISDMITV ICLDDYHSLD RTGRKEKGT ALDPRANDFD LMYEQVKALK
151 SGIADVDPY NHVTGLLDPP ELIKPPKILV IEGLHPMFDE RVRDLLDFSI
201 YLDISNEVKF AWKIQRDMAE RGHSLESIKA SIEARKPDFD AFIDPQKQYA
251 DAVIEVLPTQ LIPDDNEGKV LRVRLIMKEG VEHFSPVYLF DEGSTISWIP
301 CGRKLTCSYP GIKFSYGPDT YFGHEVSVLE MDGQFDRLE LIYVESHLSN
351 LSTKFYGEVT QQMLKHADFP GSNNGTGLFQ TIVGLKIRDL YEQITASKTA
401 APLQATKA
```

Spot No.: C4

Protein name: Phosphoribulokinase

Peptide sequences:

K.GGNPDSNTLISDMTTVICLDDYHSLDR.T;K.ILVIEGLHPMFD  
ER.V;R.VRDLLDFSIYLDISNEVK.F;R.KPDFDAFIDPQK.Q;K.EG  
VEHFSPVYLFDEGSTISWIPCGR.K

Accession No.: Gohir.D03G177400.1.p

Mascot score: 357

Sequence coverage %:23

Calculated Mr: 45591

Calculated pI: 5.96

PFF Searched Score:

Ions score is  $-10 \cdot \log(P)$ , where P is the probability that the observed match is a random event. Individual ions scores  $> 34$  indicate identity or extensive homology ( $p < 0.05$ ). Protein scores are derived from ions scores as a non-probabilistic basis for ranking protein hits.

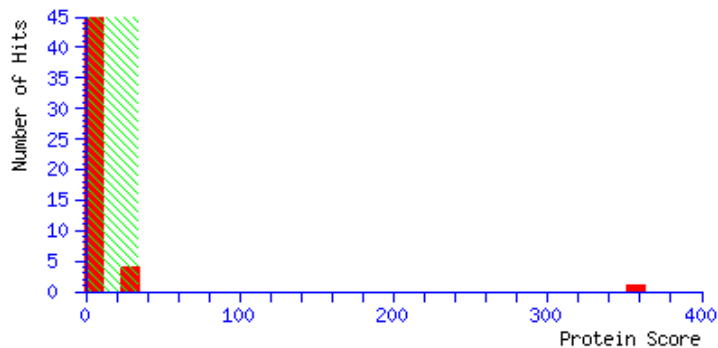

Matched peptide sequences: shown in **Bold Red**:

```
1 MAVCPVYTQ SLNSTCSIST PSKTHFSSH NHLVfyRTSK RTSKRGSSS
51 CVITCSAGDS QTVVIGLAAD SGCgKSTFMR RLTSVFGGAA EPPKGNPDS
101 NTLISDMTTV ICLDDYHSLD RTGRKEKGVT ALDPRANDFD LMYEQVKALK
151 SGIAVDKPIY NHVTGLLDPP ELIKPPKILV IEGLHPMFDE RVRDLLDFSI
201 YLDISNEVKF AWKIQRDMAE RGHSLESIKA SIEARKPDFD AFIDPQKQYA
251 DAVIEVLPTQ LIPDDNEGKV LRVRLIMKEG VEHFSPVYLF DEGSTISWIP
301 CGRKLTCSYP GIKFSYGPDT YFGHEVSVLE MDGQFDRLDE LIYVESHLSN
351 LSTKFYGEVT QQMLKHADFP GSNNGTGLFQ TIVGLKIRDL YEQITASKTA
401 APLQATKA
```

Spot No.: C6

Protein name: Malate dehydrogenase 1

Peptide sequences:

R.VLVTGAAGQIGYALVPMIAR.G;K.MELVDAAFPLLK.G;K.G  
VVATTDAVEACTGVNVAVMVGGFPR.K;R.ELVKDDAWLNGE  
FITTVQQR.G;R.KLSSALSAASAACDHIR.D

Accession No.: Gohir.D02G045500.1.p

Mascot score: 255

Sequence coverage %:28

Calculated Mr: 35830

Calculated pI: 6.10

PFF Searched Score:

Ions score is  $-10 \cdot \log(P)$ , where P is the probability that the observed match is a random event. Individual ions scores  $> 33$  indicate identity or extensive homology ( $p < 0.05$ ). Protein scores are derived from ions scores as a non-probabilistic basis for ranking protein hits.

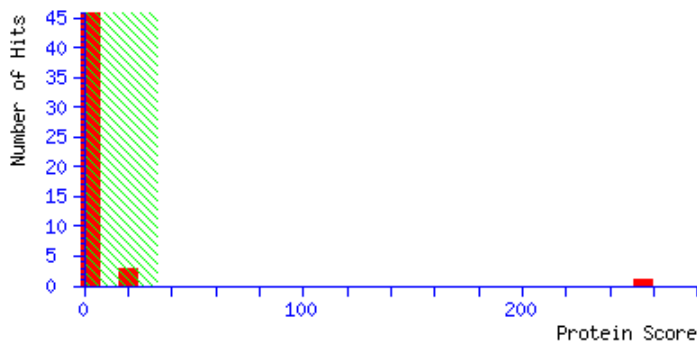

Matched peptide sequences: shown in **Bold Red**:

```
1 MAKEPVRVLV TGAAGQIGYA LVPMIARGVM LGADQPVILH MLDIPPAAEA
51 LNGVKMELVD AAFPLLKGVV ATTDAVEACT GNVVAVMVG FPRKEGMERK
101 DVMSKNVSIY KSQASALEQH AAPNCKVLVV ANPANTNALI LKEFAPSIPA
151 KNITCLTRL D HNRALGQISE KLVNQVSDVK NVIIWGNHSS TQYPDVNHAT
201 VMTPSGEKPV RELVKDDAWL NGEFITTVQQ RGAAIIKARK LSSALSAASA
251 ACDHIRDWVL GTPEGTWVSM GVYSDGSYNA PAGVIYSFPV TCKNGEWTIV
301 QGLAIDEFSR KKLDLTGVEL TEEKELAYSC LS
```



Spot No.: C7

Protein name: Coproporphyrinogen-III oxidase 1

Peptide sequences:

**K.ETLISERPHTFLR.E;K.NPFAPTLHFNYR.Y;K.FDPSFYPR.F;R.  
YVEFNLVYDR.G;R.IESILVSLPLSAR.W**

Accession No.: Gohir.A08G050600.1.p

Mascot score: 281

Sequence coverage %:14

Calculated Mr: 44571

Calculated pI: 6.28

PFF Searched Score:

Ions score is  $-10 \cdot \log(P)$ , where P is the probability that the observed match is a random event. Individual ions scores  $> 35$  indicate identity or extensive homology ( $p < 0.05$ ). Protein scores are derived from ions scores as a non-probabilistic basis for ranking protein hits.

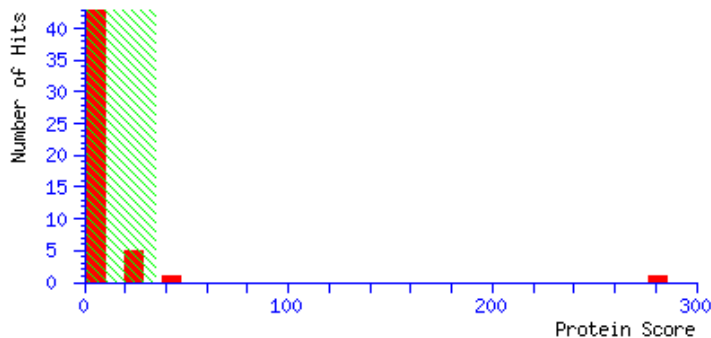

Matched peptide sequences: shown in **Bold Red**:

```
1  MPPPTAALSV  PSSSSPSLFP  LSSFSSSNNP  HVSSFCPAPT  ALPKFPSLSK
51  PKTPLRNLTP  LSAVSIEKET LISERPHTFL  READGGDDGS  VRSRFQRMIL
101 EAQESVCSAL  EAVDGAGKFK  EDAWTRPGGG  GGISRVLQDG  AVFEKAGVNI
151 SIVYGVMPEE  AYRAAKAAD  DQKPGPIPF  AAGISSVLHP  KNPFAPTLHF
201 NYRYFETDAP  KDAPGAPRQW  WFGGGTDLTP  AYIFEEDVKH  FHSIQKKACD
251 KFDPSFYPRF  KKWCCDYFYI  KHRGERRGLG  GIFFDDLNDY  DQEMLLSFAT
301 ECANSVVPAY  IPIIEKRKDT  PFNESQKAWQ  QLRRGRYVEF NLVYDRGTTF
351 GLKTGGRIES ILVSLPLSAR  WEYDHKPEEG  SEEWKLLDAC  INPKEWI
```

Spot No.: C8

Protein name: Ribulose-bisphosphate carboxylases

Peptide sequences:

**K.DTDILAAFR.V;K.TFQGPPHGIQVER.D;R.AVYECLR.G;R.GG  
LDFTKDDENVNSQPFMR.W**

Accession No.: Gohir.A03G084800.1.p

Mascot score: 250

Sequence coverage %:9

Calculated Mr: 54651

Calculated pI: 6.00

PFF Searched Score:

Ions score is  $-10 \cdot \log(P)$ , where P is the probability that the observed match is a random event. Individual ions scores  $> 35$  indicate identity or extensive homology ( $p < 0.05$ ). Protein scores are derived from ions scores as a non-probabilistic basis for ranking protein hits.

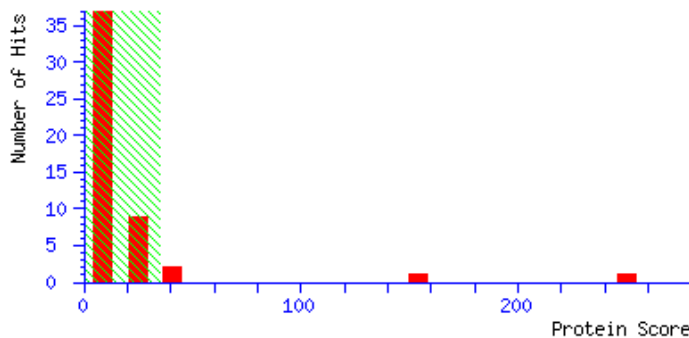

Matched peptide sequences: shown in **Bold Red**:

```
1 MSCREGLMSP QTETKASVGF KAGVKEYKLT YYTPEYEVKD TDILAAFRVT
51 PQPGVPPEEA GAAVAAESST GTWTTVWTDG LTSLDRYKGR CYDIEPVPGE
101 EDQYICYVAY PLDLFEESV TMFTSIVGN VFGFKALRAL RLEDLRVPTA
151 YIKTFQGPPH GIQVERDKLN KYGRPLLGCT IKPKLGLSAK NYGRAVYECL
201 RGGLDFTKDD ENVNSQPFMR WRDRFLFAE AIFKSQAETG EIKGHYLNAT
251 AGTCEEMIKR AMCARELGVP IVMHDYLTGG FTANTSLAHY CRDNGLLLHI
301 HRAMHAVIDR QKNHGMHFRV LAKALRMSGG DHIHAGTVVG KLEGERDITL
351 GFVDLLRDDF IEKDRSRGIY FTQDWVSMGP VLPVASGGIH VWHMPALTEI
401 FGDDSVLQFG GGTLGHPWGN APGAVANRVA LEACVQARNE GRDLAREGNE
451 IIREASKWSP ELAAACEVWK AIKFEFDAVD KLDKVEK
```

Spot No.: **C11**

Protein name: **30S ribosomal protein, putative**

Peptide sequences: **R.AEEDAETVYGSIDLVSILQR.K**

Accession No.: **Gohir.1Z057400.1.p**

Mascot score: **207**

Sequence coverage %: **7**

Calculated Mr: **32072**

Calculated pI: **5.53**

PFF Searched Score:

Ions score is  $-10 \cdot \log(P)$ , where P is the probability that the observed match is a random event. Individual ions scores  $> 34$  indicate identity or extensive homology ( $p < 0.05$ ). Protein scores are derived from ions scores as a non-probabilistic basis for ranking protein hits.

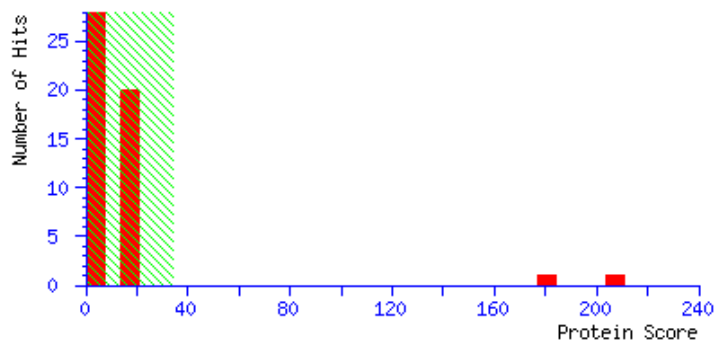

Matched peptide sequences: shown in **Bold Red**:

```
1 MATTLLASSQ TSFHHPLSVS DSSFSSPSSS SSSVSMFTLT KPRIPLPSY
51 KSSFFNPIGN YFKCVEMEPR KIRNSSLTVR MSWDGPLASV KLIIQGKSLE
101 LTDTVKQHVE EKVTLFTKKH GVVRAEEDAE TVYGSIDLVS SILQRKLRLKI
151 KEKESDRGRH MKGFSSRSKVR EPVAVVVDDD AEAVPEQVVA DDDVAAVPEQ
201 EDDSFIDEIV RTKYFEMPPL TVSEAVEQLE NVDHDFYGFR NEETGEINII
251 YKRKAGGYGL IIPKGNKAE KLEPLVESA KEHSYVE
```

Spot No.: **C12**

Protein name:

Peptide sequences:

Accession No.:

Mascot score:

Sequence coverage %:

Calculated Mr:

Calculated pI:

PFF Searched Score:

Ions score is  $-10 \cdot \log(P)$ , where P is the probability that the observed match is a random event. Individual ions scores  $> 34$  indicate identity or extensive homology ( $p < 0.05$ ). Protein scores are derived from ions scores as a non-probabilistic basis for ranking protein hits.

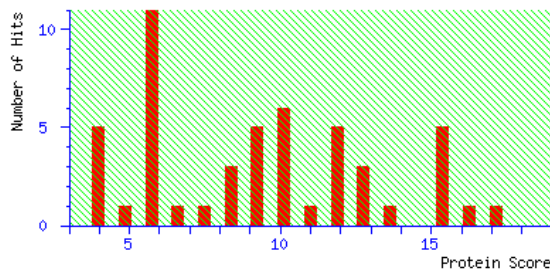

Matched peptide sequences: shown in **Bold Red**:

Spot No.: C14

Protein name: Photosystem II subunit O-2

Peptide sequences:

K.RLTYDEIQSK.T;K.GTGTANQCPTIDGGVDSFAFKPGK.Y;K.F  
EEKDGIDYAAVTVQLPgger.V;K.DGIDYAAVTVQLPgger.V;  
R.VPFLFTIK.Q;K.QLVASGKPDSFGGDFLVPSYR.G;R.GGSTGY  
DNAVALPAGGR.G

Accession No.: Gohir.D11G194600.1.p

Mascot score: 912

Sequence coverage %:30

Calculated Mr: 35293

Calculated pI: 5.37

PFF Searched Score:

Ions score is  $-10 \cdot \log(P)$ , where P is the probability that the observed match is a random event. Individual ions scores  $> 34$  indicate identity or extensive homology ( $p < 0.05$ ). Protein scores are derived from ions scores as a non-probabilistic basis for ranking protein hits.

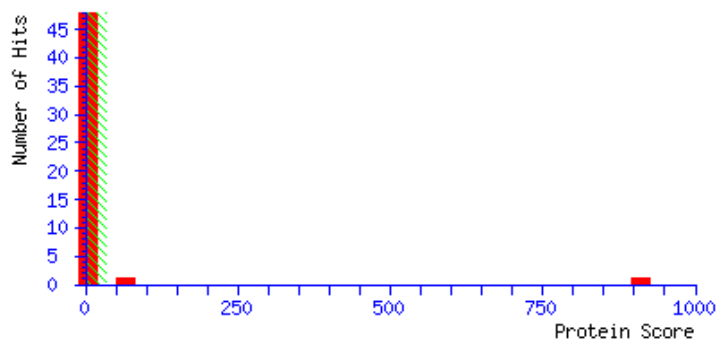

Matched peptide sequences: shown in **Bold Red**:

```
1 MSVSLQAAAT LMQPIKVAAP SRTNVLLRSS QSVSKAFGLE PVGARLTCSL
51 QTDLKDLAQT CVDATKLAGF ALATSALVVS GASAEGVPKR RLTYDEIQSKT
101 YMEVKGTGTA NQCPTIDGGV DSFAFKPGKY YAKKFCLEPT SFTVKAEGVN
151 KNAPPEFQNT KLMTRLTYTL DEIEGPFEVS TDGTVKFEEK DGIDYAAVTV
201 QLPggerVVPF LFTIKQLVAS GKPD SFGGDF LVPSYRGSSF LDPKGRGGST
251 GYDNAVALPA GGRGDEEELA KENNKSAASS SGKITLSVTK SKPETGEVIG
301 VFESLQPSDT DLGAKTPKDV KITGVWYAQL DS
```

Spot No.: **C15**

Protein name: **2-phosphoglycolate phosphatase 1**

Peptide sequences:

**K.LIDGVPETLDMLR.S;K.VQYGTLCIR.E;R.ENPGCLFIATNR.D**

Accession No.: **Gohir.A02G108400.1.p**

Mascot score: **79**

Sequence coverage %: **9**

Calculated Mr: **41067**

Calculated pI: **8.45**

PFF Searched Score:

Ions score is  $-10 \cdot \log(P)$ , where P is the probability that the observed match is a random event. Individual ions scores  $> 34$  indicate identity or extensive homology ( $p < 0.05$ ). Protein scores are derived from ions scores as a non-probabilistic basis for ranking protein hits.

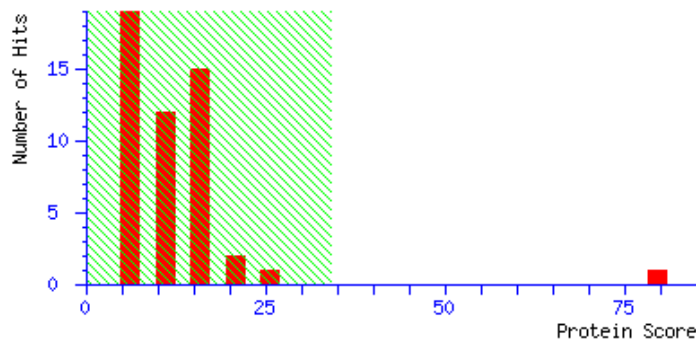

Matched peptide sequences: shown in **Bold Red**:

```
1 MATKAAVSVA ASVTAASSSS SKFVINTPHR FLCLKRLSSF SSFSASALAI
51 KCTSISNCSP NKSARSMEGF TTRTKASAQP LENADELIAS VETFIFDCDG
101 VIWKGDKLID GVPETLDMLR SKGKRLVFVT NNSTKSRKQY GKKFETLGLN
151 VNEEEIFASS FAAAAYLKSI NFPKDKKVYV IGEDGILKEL ELAGFQYLG
201 PEDGGKKIEL KPGFLMEHDK DVGAVVVGFD RYFNYYKVQY GTLCIRENPG
251 CLFIATNRDA VTHLTDAQEW AGGGSVMGAI CGSTQREPLV VGKPSFMM
301 YLANKFGILK SQICMVGDRD DTDILFGQNG GCKTLLVLSG VTNLSMLQSP
351 SNSIQPDFYT NKISDFLSIK TATV
```

Spot No.: C16

Protein name: Oxygen-evolving enhancer protein 1

Peptide sequences:

K.FEEKDGIDYAAVTVQLPGGGER.V;K.DGIDYAAVTVQLPGGE  
R.V;R.VPFLFTIK.Q;K.QLVASGKPDSEFGGDFLVPSYR.G;R.GGS  
TGYDNAVALPAGGR.G

Accession No.: Gohir.A11G188100.1.p

Mascot score: 343

Sequence coverage %: 20

Calculated Mr: 35233

Calculated pI: 5.84

PFF Searched Score:

Ions score is  $-10 \cdot \log(P)$ , where P is the probability that the observed match is a random event. Individual ions scores  $> 34$  indicate identity or extensive homology ( $p < 0.05$ ). Protein scores are derived from ions scores as a non-probabilistic basis for ranking protein hits.

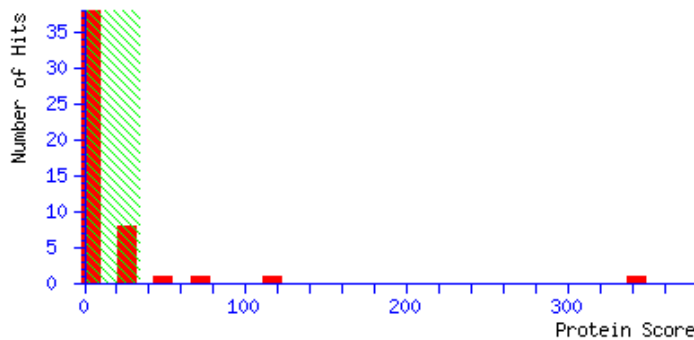

Matched peptide sequences: shown in **Bold Red**:

```
1 MAVSLQAAAT LMQPIKVAAP SRINVPLRSS QSVSKAFGLE PVGARLTCSL
51 QTDLKDIALK CVDATKLAGF ALATSALVVS GASAEGVSKR LTYAEIQSKT
101 YMEVKGTGTA NQCPTIDGGV DSFAFKPGKY YAKKFCLEPT SFTVKAEGVN
151 KNAPPEFQNT KLMTRLTYTL DEIEGPFEVS TDGTLKFEEK DGIDYAAVTV
201 QLPGGERVVF LFTIKQLVAS GKPDSFGGDF LVPSYRGSSF LDPKGRGGST
251 GYDNAVALPA GGRGDEEELA KENNKSAASS SGKITLSVTK SKPETGEVIG
301 VFESLQPSDT DLGAKTPKDV KITGVWYAQL DS
```



Spot No.: **C17**

Protein name: **Oxygen-evolving enhancer protein 1**

Peptide sequences:

**K.GTGTANQCPTIDGGVDSFAFKPGK.Y;K.FEEKDGIDYAAVTV  
QLPgger.V;K.DGIDYAAVTVQLPgger.V;R.VPFLFTIK.Q;K.  
QLVASGKPDSFGGDFLVPSYR.G;R.GGSTGYDNAVALPAGGR.  
G**

Accession No.: **Gohir.A11G188100.1.p**

Mascot score: **853**

Sequence coverage %: **27**

Calculated Mr: **35233**

Calculated pI: **5.84**

PFF Searched Score:

Ions score is  $-10 \cdot \log(P)$ , where P is the probability that the observed match is a random event. Individual ions scores  $> 33$  indicate identity or extensive homology ( $p < 0.05$ ). Protein scores are derived from ions scores as a non-probabilistic basis for ranking protein hits.

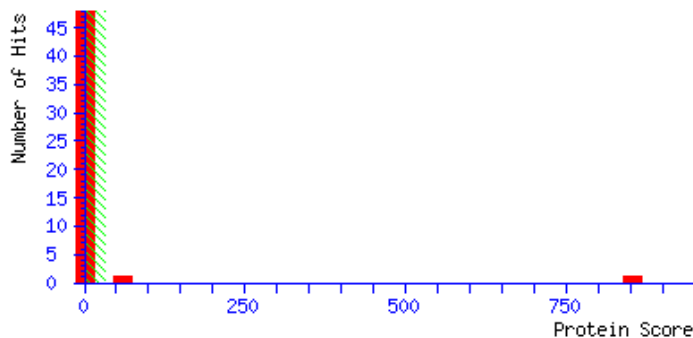

Matched peptide sequences: shown in **Bold Red**:

```
1 MAVSLQAAAT LMQPIKVAAP SRTNVPLRSS QSVSKAFGLE PVGARLTCSL
51 QTDLKDALK CVDATKLAGF ALATSALVVS GASAEGVSKR LTYAEIQSKT
101 YMEVKGTGTA NQCPTIDGGV DSFAFKPGKY YAKKFCLEPT SFTVKAEGVN
151 KNAPPEFQNT KLMTRLTYTL DEIEGPFEVS TDGTLKFEEK DGIDYAAVTV
201 QLPggerVPP LFTIKQLVAS GKPDSFGGDF LVPSYRGSSF LDPKGRGGST
251 GYDNAVALPA GGRGDEEELA KENNKSAASS SGKITLSVTK SKPETGEVIG
301 VFESLQPSDT DLGAKTPKDV KITGVWYAQL DS
```

Spot No.: **C18**

Protein name:

Peptide sequences:

Accession No.:

Mascot score:

Sequence coverage %:

Calculated Mr:

Calculated pI:

PFF Searched Score:

Ions score is  $-10 \cdot \log(P)$ , where P is the probability that the observed match is a random event. Individual ions scores  $> 34$  indicate identity or extensive homology ( $p < 0.05$ ). Protein scores are derived from ions scores as a non-probabilistic basis for ranking protein hits.

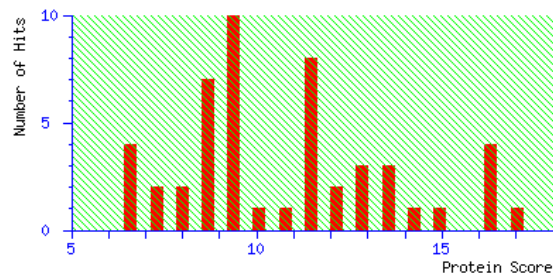

Matched peptide sequences: shown in **Bold Red**:

Spot No.: C20

Protein name: Ribose 5-phosphate isomerase, type A protein

Peptide sequences:

**K.SGMILGLGTGSTAAFVVDK.I;K.RTQEQAASLNIP LSTLDLHP  
R.I;R.TQEQAASLNIP LSTLDLHPR.I;R.IDLAIDGADEVDPNLDL  
VK.G**

Accession No.: Gohir.A11G253800.1.p

Mascot score: 288

Sequence coverage %: 20

Calculated Mr: 29906

Calculated pI: 6.44

PFF Searched Score:

Ions score is  $-10 \cdot \log(P)$ , where P is the probability that the observed match is a random event. Individual ions scores  $> 33$  indicate identity or extensive homology ( $p < 0.05$ ). Protein scores are derived from ions scores as a non-probabilistic basis for ranking protein hits.

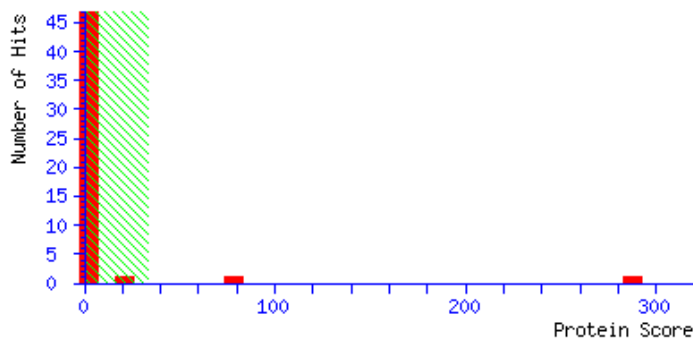

Matched peptide sequences: shown in **Bold Red**:

```
1 MASLSLNLSS LHHTSINPLI LRCTPLNLRT PSQKPF SIRS QAAPVLSQDD
51 LKKLAADKAV ESVKSGMILG LGTGSTAAFV VDKIGQLLST GQLSNIVGIP
101 TSKRTQEQAASLNIP LSTLDLHPRIDLAID GADEVDPNLD LVKGRGGALL
151 REKIVEAASS SFIVVADESK LVSGLGGSGL AMPVEVVQFC WKYNLIRLQG
201 LFKELGCEAK LRLVGDGSEK PYVTDNGNYI VDLYFKNPIK DGFGAGKEIS
251 ALEGVVEHGL FLGMATSVII AGKTGIEVMT K
```

Spot No.: **C24**

Protein name: **Photosystem I light harvesting complex gene 3**

Peptide sequences:

**K.AGLIPAETALPWFR.T;K.YLGGSGEPAYPGGPLFNPLGFGKD  
EK.S**

Accession No.: **Gohir.A11G146500.1.p**

Mascot score: **198**

Sequence coverage %:**14**

Calculated Mr: **29458**

Calculated pI: **8.86**

**PFF Searched Score:**

Protein score is  $-10 \cdot \log(P)$ , where P is the probability that the observed match is a random event. Protein scores greater than 62 are significant ( $p < 0.05$ ). Protein scores are derived from ion scores as a non-probabilistic basis for ranking protein hits.

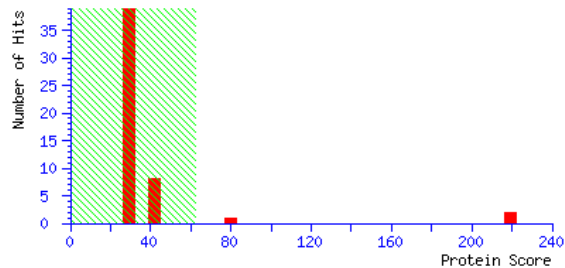

**Matched peptide sequences: shown in Bold Red:**

```
1 MATQALVSSS LTYSVETARQ ILGAKRQIGS SRKGSFVVK A STPPVKQGA
51 DRPLWFASKQ SLSYLDGSLP GDYGFDPGL SDPEGPGGFI EPKWLAYGEI
101 INGRYAMLGA VGAI APEILG KAGLIPAETA LPWFRTGVIP PAGTYNYWAD
151 PYTLFVFEMA LMGFAEHRRF QDWAKPGSMG KQYELGFEKY LGGSGEPAYP
201 GGPLFNPLGF GKDEKSLKDL KLKEVKNRRL AMLAILGYFI QGLVTGVGPY
251 QNLLDHLADP FNNNVLTNLK FH
```

**Spot No.: D1**

**Protein name:**

**Peptide sequences:**

**Accession No.:**

**Mascot score:**

**Sequence coverage %:**

**Calculated Mr:**

**Calculated pI:**

**PFF Searched Score:**

Ions score is  $-10 \cdot \log(P)$ , where P is the probability that the observed match is a random event. Individual ions scores  $> 34$  indicate identity or extensive homology ( $p < 0.05$ ). Protein scores are derived from ions scores as a non-probabilistic basis for ranking protein hits.

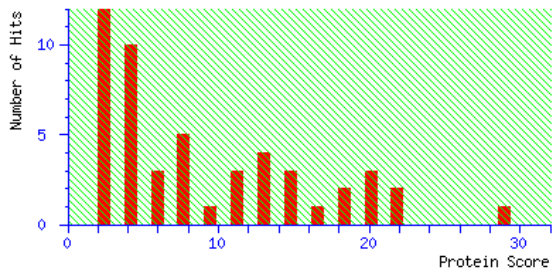

**Matched peptide sequences: shown in **Bold Red**:**

**Spot No.: D3**

**Protein name: Oxygen-evolving enhancer protein 2-1**

**Peptide sequences:**

**K.TDTEFMPYNGDGFK.L;K.EVEFPGQVLR.Y;K.SITDYGSPEEF  
LSSVDYLLGK.Q;K.TDSEGGFDSGAVATANILESSSSTVGGKPY  
YFLSVLTR.T;K.PYYFLSVLTR.T**

**Accession No.: Gohir.D04G034900.1.p**

**Mascot score: 507**

**Sequence coverage %:31**

**Calculated Mr: 28189**

**Calculated pI: 7.67**

**PFF Searched Score:**

Ions score is  $-10 \cdot \log(P)$ , where P is the probability that the observed match is a random event. Individual ions scores  $> 34$  indicate identity or extensive homology ( $p < 0.05$ ). Protein scores are derived from ions scores as a non-probabilistic basis for ranking protein hits.

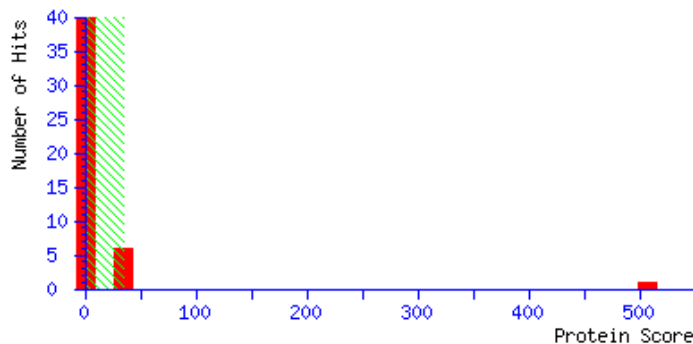

**Matched peptide sequences: shown in Bold Red:**

```
1  MASAACFLHH  HALTTNGRSS  SLPPSLRQVS  NMKPNQOVVC  KAQKQEDDGS
51  LVSRRALTV  LIGAAAVGSK  VSPADAAYGE  AANVFGKPKT  DTEFMPYNGD
101 GFKLSIPSKW  NPSKEVEFPG  QVLRYEDNFD  TTSNLSVMIT  PTDKKSITDY
151 GSPEEFLSSV  DYLLGQAYF  GKTDSEGGFD  SGAVATANIL  ESSSSTVGGK
201 PYYFLSVLTR  TADGDEGGKH  QLITATVNNG  KLYICKAQAG  DKRWFKGARK
251  FVESAASSFS  VA
```

**Spot No.: D4**

**Protein name: Photosystem II subunit P-1**

**Peptide sequences:**

**K.TDTDFMPYSGDGFK.L;K.EVEFPGQVLR.Y;K.SITDYGSPEEF  
LSSVDYLLGK.Q;K.TDAEGGFDSGAVATANILESSSSTVGGKPY  
YFLSVLTR.T;K.PYYFLSVLTR.T**

**Accession No.: Gohir.A05G380700.1.p**

**Mascot score: 444**

**Sequence coverage %:31**

**Calculated Mr: 28109**

**Calculated pI: 7.67**

**PFF Searched Score:**

Ions score is  $-10 \cdot \log(P)$ , where P is the probability that the observed match is a random event. Individual ions scores  $> 34$  indicate identity or extensive homology ( $p < 0.05$ ). Protein scores are derived from ions scores as a non-probabilistic basis for ranking protein hits.

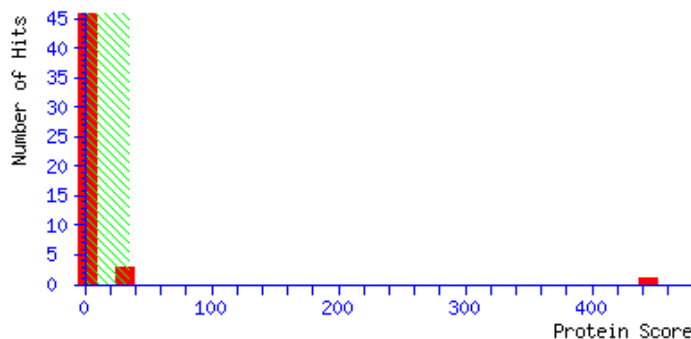

**Matched peptide sequences: shown in Bold Red:**

```
1  MASAACFLHH  HALTTNGRSS  SLSPSLRQVS  NMKPTQQVVC  KAQKQEDDGS
51  LVSRRALALT  V  LIGAAAVGSK  VSPADAAAYGE  AANVFGKPKT  DTDFMPYSGD
101 GFKLSIPSKW  NPSKEVEFPG  QVLRYEDNFD  TTSNLSVMIT  PTDKKSSITDY
151 GSPEEFLSSV  DYLLGKQAYF  GKTDAEGGFD  SGAVATANIL  ESSSSTVGGK
201 PYYFLSVLTR  TADGDEGGKH  QLITATVNNG  KLYICKAQAG  DKRWFKGARK
251  FVESAASSFS  VA
```



Spot No.: **D5**

Protein name: **Ribulose-bisphosphate carboxylases**

Peptide sequences:

**K.LTYYTPEYEVK.D;K.DTDILAAFR.V;R.VTPQPGVPPEEAGAA  
VAAESSTGTWTTVWTDGLTSLDR.Y;K.TFQGPPHGIQVER.D**

Accession No.: **Gohir.A03G084800.1.p**

Mascot score: **206**

Sequence coverage %:**14**

Calculated Mr: **54651**

Calculated pI: **6.00**

PFF Searched Score:

Ions score is  $-10 \cdot \log(P)$ , where P is the probability that the observed match is a random event. Individual ions scores  $> 34$  indicate identity or extensive homology ( $p < 0.05$ ). Protein scores are derived from ions scores as a non-probabilistic basis for ranking protein hits.

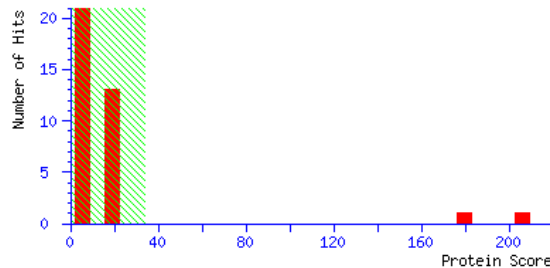

Matched peptide sequences: shown in **Bold Red**:

```
1 MSCREGLMSP QTETKASVGF KAGVKEYKLT YYIPEYEVKD TDILAAFRVT
51 PQPGVPPEEA GAAVAAESST GTWTTWTDG LTSLDRYKGR CYDIEPVPGE
101 EDQYICYVAY PLDLFEEGSV TNMFTSIVGN VFGFKALRAL RLEDLRVPTA
151 YIKTFQGPPH GIQVERDKLN KYGRPLLGCT IKPKLGLSAK NYGRAVYECL
201 RGGLDFTKDD ENVNSQPFR WRDRFLFCAE AIFKSQAETG EIKGHYLNAT
251 AGTCEEMIKR AMCARELGVP IVMHDYLTGG FTANTSLAHY CRDNGLLLHI
301 HRAMHAVIDR QKNHGMHFRV LAKALRMSGG DHIHAGTVWG KLEGERDITL
351 GFVDLLRDDF IEKDRSRGIY FTQDWSMPG VLPVASGGIH VWHMPALTEI
401 FGDDSVLQFG GGTLGHPWGN APGAVANRVA LEACVQARNE GRDLAREGNE
451 IIREASKWSP ELAAACEVWK AIKFEFDAVD KLDKVEK
```

Spot No.: **D10**

Protein name: **Photosynthetic electron transfer C**

Peptide sequences:

**K.FICPCHGSQYNDQGR.V;K.VVFVPWVETDFR.T**

Accession No.: **Gohir.D02G184300.1.p**

Mascot score: **139**

Sequence coverage %:**11**

Calculated Mr: **24700**

Calculated pI: **8.48**

PFF Searched Score:

Ions score is  $-10 \cdot \log(P)$ , where P is the probability that the observed match is a random event. Individual ions scores  $> 34$  indicate identity or extensive homology ( $p < 0.05$ ). Protein scores are derived from ions scores as a non-probabilistic basis for ranking protein hits.

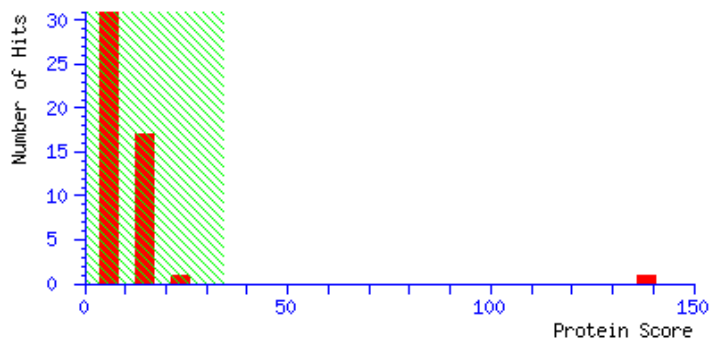

Matched peptide sequences: shown in **Bold Red**:

```
1 MASSTLSPAA PWQLCSGKSG MFCPSQAFV KPTRTHMVKN EKMTRITCQA
51 TSIPADRVPD MGKRQLMNL LLGAI SLPSG FMLVPYAAFF VPSGGRGTGG
101 GTVAKDAIGN DVIAEEWLKT HPGDRILTQ GLKGDPTYLV VEKDRTLATY
151 GINAVCTHLG CVVPWQAEN KFICPCHGSQ YNDQGRVVRG PAPLSLALAH
201 AGVEDGKVVF VPWVETDFRT GDGPWWS
```

**Spot No.: D16**

**Protein name: Nucleoside diphosphate kinase 2**

**Peptide sequences:**

**R.GLVGEIISR.F;R.KLIGSTNPLQAEPGTIR.G;K.LIGSTNPLQAE  
PGTIR.G**

**Accession No.: Gohir.A09G245300.1**

**Mascot score: 120**

**Sequence coverage %:11**

**Calculated Mr: 26192**

**Calculated pI: 9.02**

**PFF Searched Score:**

Ions score is  $-10 \cdot \log(P)$ , where P is the probability that the observed match is a random event. Individual ions scores  $> 34$  indicate identity or extensive homology ( $p < 0.05$ ). Protein scores are derived from ions scores as a non-probabilistic basis for ranking protein hits.

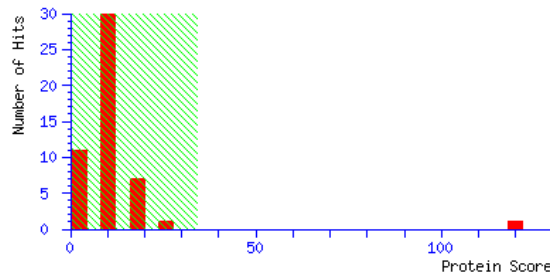

**Matched peptide sequences: shown in Bold Red:**

```
1 METITLSPSL TTSSFGTSAA ATVKRSSATC LSYTSHANLN VNHLAAFHKQ
51 SHLFTKSPTR PFVFTKTRAN KSAHGIFLPH LVASLEQVEQ TYIMVKPDGV
101 QRGLVGEIIS RFERKGFKLT GLKLFQCPKE LAEEHYKDLK TKSFYPTLID
151 YITSGPVVCM VWEGVGVVAS ARKLIGSTNP LQAEPGTIRG DLAVQTGRNV
201 VHGSDSPENG KRETALWFKE GELCEWTPAQ APWLME
```

Spot No.: **D21**

Protein name: **Nucleoside diphosphate kinase family protein**

Peptide sequences:

**R.GLVGEIIGR.F;R.KIIGATNPAESAPGTIR.G;K.IIGATNPAESA  
PGTIR.G;R.NVIHGSDSVESAR.K**

Accession No.: **Gohir.D08G160400.1.p**

Mascot score: **134**

Sequence coverage %:**26**

Calculated Mr: **16414**

Calculated pI: **6.30**

PFF Searched Score:

Ions score is  $-10 \cdot \log(P)$ , where P is the probability that the observed match is a random event. Individual ions scores  $> 35$  indicate identity or extensive homology ( $p < 0.05$ ). Protein scores are derived from ions scores as a non-probabilistic basis for ranking protein hits.

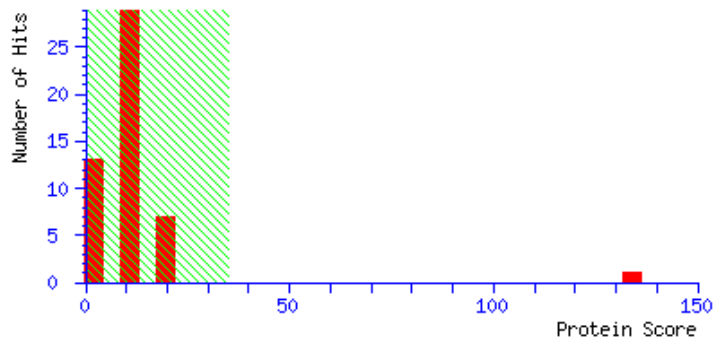

Matched peptide sequences: shown in **Bold Red**:

1 MEQTFIMIKP DGVQR**GLVGE IIGR**FEKKGF YLKGLKLITV DQSFAEKHYA  
51 DLSAKPFFNG LVEYIISGPV VAMIWEGKNV VTTGR**KIIGA TNPAESAPGT**  
101 **IRGDF**AIDIG **RNVIHGSDSV ESAR**KEIALW FPESPVNWQS SVHPWIYE

Spot No.: **E1**

Protein name: **Translation elongation factor EFG/EF2 protein**

Peptide sequences:

**R.INIIDTPGHVDFTLLEVER.A;K.LAQEDPSFHFSR.D;R.AVLVDG  
SYHDVDSSVLAFLAAR.G**

Accession No.: **Gohir.A11G019900.1.p**

Mascot score: **101**

Sequence coverage %:**6**

Calculated Mr: **86600**

Calculated pI: **5.54**

PFF Searched Score:

Ions score is  $-10 \cdot \log(P)$ , where P is the probability that the observed match is a random event. Individual ions scores  $> 34$  indicate identity or extensive homology ( $p < 0.05$ ). Protein scores are derived from ions scores as a non-probabilistic basis for ranking protein hits.

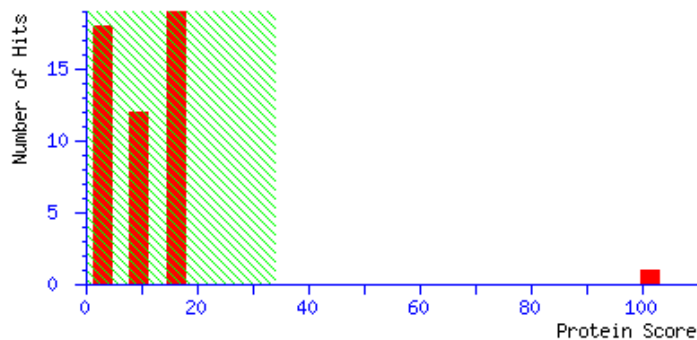

Matched peptide sequences: shown in **Bold Red**:

```
1  MAAETALRVS  SSSSTVCNLN  GFQRRPTPLS  SSTRFLGLRP  RASSSSISSS
51  LSQFMGSVRI  GSRLPISLQQ  KGKRRNFSLF  AMAADESKRA  VPLKDYRNIG
101  IMAHIDAGKT  TTTERILYYT  GRNYKIGEVH  EGTATMDWME  QEQERGITIT
151  SAATTTFWKD  HRINIIDTPG  HVDFTLEVER  ALRVLDGAIC  LFDSVAGVEP
201  QSETVWRQAD  KYGVPRICFV  NKMDRLGANF  FRTRDMIVTN  LGAKPLVIQL
251  PVGAEDNFKG  VIDLVKMKAV  LWSGEELGAK  FEYADIPADL  QELAEYRSQ
301  MIETIVELDD  QAMENYLEGV  EPDEETIKKL  IRKGTIGISF  VPVLCGSAFK
351  NKGVQPL LDA  VMDYLPSPLE  LPAMKGTDPE  NPEVIIERTA  SDEEPFSGLA
401  FKIMTDPFVG  SLTFVRVYSG  KLAAGSYVLN  ANKGKKERIG  RLEMHANSR
451  EDVKVALAGD  IVALAGLKDT  ITGETLSDDP  HPIVLERMDF  PDPVIKVAIE
501  PKTKADVDMK  ANGLIKLAQE  DPSFHFSRDE  EINQTVIEGM  GELHLEIIVD
551  RLKREFKVEA  NVGAPQVNYR  ESISKVSEVK  YVHKKQSGGQ  GQFADITVRF
601  EPMDAGSGYE  FKSEIKGGAV  PKEYIPGVMK  GLEECMNGV  LAGFPVVDVR
651  AVLVDGSYHD  VDSSVLAFLA  AARGAFREGI  RKAGPRMLEP  IMKVEVVTPE
701  EHLGDVIGDL  NSRRGQINSF  GDKPGGLKVV  DALVPLAEMF  QYVSTLRGMT
751  KGRASYTMQL  AKFDVVPQHI  QNELATKQQE  VVA
```

Spot No.: **E3**

Protein name: **Chloroplast heat shock protein 70-2**

Peptide sequences:

**K.AVVTVPAYFNDSQR.T;R.VKFEELCSDLLDR.L;K.DIDEVILV  
GGSTR.I;R.IPAVQELVR.K;K.SEVFSTAADGQTSVEINVLQGER.  
E**

Accession No.: **Gohir.D09G212600.1.p**

Mascot score: **464**

Sequence coverage %:**10**

Calculated Mr: **75693**

Calculated pI: **5.17**

PFF Searched Score:

Ions score is  $-10 \cdot \log(P)$ , where P is the probability that the observed match is a random event. Individual ions scores  $> 34$  indicate identity or extensive homology ( $p < 0.05$ ). Protein scores are derived from ions scores as a non-probabilistic basis for ranking protein hits.

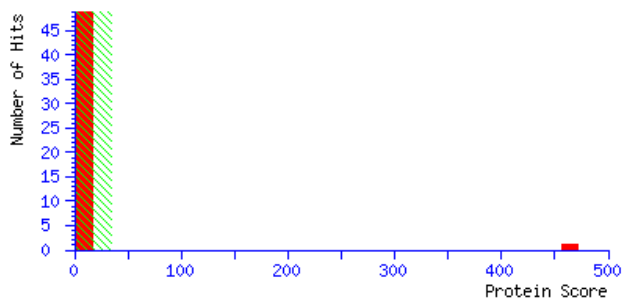

Matched peptide sequences: shown in **Bold Red**:

```
1 MASSTAQIHV LGGMGFDSSR KPNQHSSRTV FFGQRLGKTS PLNATFLRLA
51 KTKNSNGKGY NVGPVRRVNE KVVGIDLGT NSAVAAMEGG KPTIVTNAEG
101 QRTTPSVVAY TKSGDRLVGQ IAKRQAVVNP ENTFFSVKRF IGRKMSEVDE
151 EAKQVSYKVI RDENGNVLE CPATSKQFAA EEISAQVLRK LVDDASKFLS
201 ESVTKAVVTV PAYFNDSQRT ATKDAGRIAG LEVLRIINEP TAASLAYGFE
251 KKNNETILVF DLGGGTFDVS VLEVGDGVFE VLSTSGDTHL GGDDFDKRIV
301 DWLAENFKRD EGIDLLKDKQ ALQRLTEAAE KAKMELSTLT QTNISLPPIT
351 ATADGPKHIE TTLTRVKFEE LCSDLLDRLK KPVENALGDA KLSFKDIDEV
401 ILVGGSTRIP AVQELVRKMT GKEPNVTVNP DEVVALGAAV QAGVLAGDVS
451 DIVLLDVTPL SLGLETGGV MTKIIPRNTT LPTSKSEVFS TAADGQTSVE
501 INVLQGEREF VRDNKSLGSF RLDGIPPAPR GVPQIEVKFD IDANGILSVT
551 AVDKGTGKKQ DITITGASTL PGDEVDRMVK EAERFAQEDK EKRDAIDTKN
601 QADSAVYQTE QQLKELGDKV PGPVKEKVDA KLQELKDAIS GGSTQGMKDA
651 MAALNQEVMQ LGQSLYNQPS AGSAAGPAPG GETGRSDSSN KGSDEVIDA
701 DFTDSK
```

Spot No.: **E5**

Protein name: **ATP-dependent zinc metalloprotease FTSH 8**

Peptide sequences:

**R.FLEYLDKDR.V;K.ENAPCIVFVDEIDAVGR.Q;R.ADILDSALL  
RPGR.F;K.KFETDVSFDVIAMR.T;R.TPGFSGADLANLLNEAAIL  
AGR.R;R.ISDSAYEIALQHIR.N**

Accession No.: **Gohir.A01G022900.1.p**

Mascot score: **377**

Sequence coverage %: **12**

Calculated Mr: **74627**

Calculated pI: **6.24**

PFF Searched Score:

Ions score is  $-10 \cdot \log(P)$ , where P is the probability that the observed match is a random event. Individual ions scores  $> 34$  indicate identity or extensive homology ( $p < 0.05$ ). Protein scores are derived from ions scores as a non-probabilistic basis for ranking protein hits.

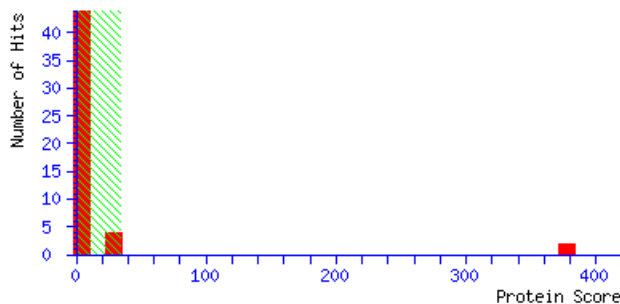

Matched peptide sequences: shown in **Bold Red**:

```
1 MAASSACLLG NGPSTHRTKS KLSKEFYGRN IVFTPAISSL GRKSNVAVLK
51 ASLKHKQHEG RRGFLKSLLG TAGIGVPALL GNGKAYADEQ GVSSSRMSYS
101 R.FLEYLDKDR VKKVDLFENG TIAIVEAVSP ELGNRVQRVR VQLPGLSQEL
151 LQKFREKNID FAAHNAQEDS GSLLFNLIGN LAFPLILIGG LFLLSRRSSG
201 GMGGPGGPGF PLAFGQSKAK FQMEPNTGVT FDDVAGVDEA KQDFMEVVEF
251 LKKPERFTAV GARIPKGVLL IGPPGTGKTL LAKAIAGEAG VPFFSISGSE
301 FVEMFVGVA SRVRDLFKKA K.ENAPCIVFV DEIDAVGRQR GTGIGGGNDE
351 REQTLNQLLT EMDGFEGNTG IIVIAATNRA DILDSALLRP GRFDRQVTVD
401 VPDIRGRTEI LKVHGSNKKF ETDVSFDVIA MRTPGFSGAD LANLLNEAAI
451 LAGRRGKTAI SSKEIDDSID RIVAGMEGTV MTDGKSKSLV AYHEVGHAIC
501 GTLTPGHDPV QKVTLIPRQ ARGTLWFIPS DDPTLISKQQ LFARIVGGLG
551 GRAAEEIIFG EPEVTTGAAG DLQQITGLAK QMVVTFGMSE IGPWSLMDSS
601 AQSADVIMRM MARNMSSEKL AEDIDTAVKR ISDSAYEIAL QHIRNNREAI
651 DKIVEVLLEK ETMSGDEFRA ILSEFVEIPA ENQVPPSVPT PVSV
```



Spot No.: **E6**

Protein name: **Chaperonin-60alpha**

Peptide sequences:

**K.EIAFDQSSR.A;K.LADAVGLTLGPR.G;R.AIELPNAMENAGAA  
LIR.E;K.LICEFENAR.V;K.DSTQIIADAASKDEIQAR.V**

Accession No.: **Gohir.A13G232000.1.p**

Mascot score: **311**

Sequence coverage %:**11**

Calculated Mr: **62143**

Calculated *pI*: **5.15**

PFF Searched Score:

Ions score is  $-10 \cdot \log(P)$ , where P is the probability that the observed match is a random event. Individual ions scores  $> 34$  indicate identity or extensive homology ( $p < 0.05$ ). Protein scores are derived from ions scores as a non-probabilistic basis for ranking protein hits.

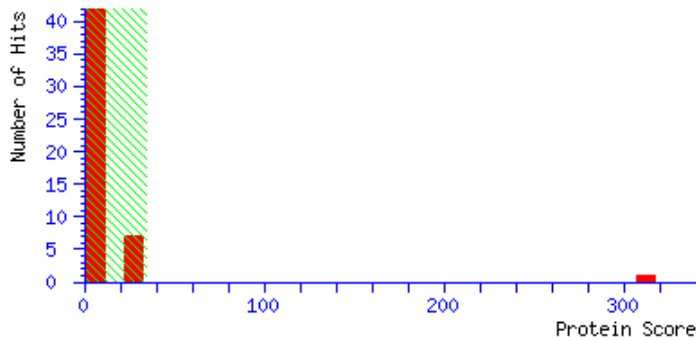

Matched peptide sequences: shown in **Bold Red**:

```
1  MASANALSSA  SILCSPNKGS  LRRKGNQRQN  QRVNYRQGNN  RFGVKACAKE
51  IAFDQSSRAA  MQAGIDKLAD  AVGLTLGPRG  RNVVLDEFGS  PKVVNDGVTI
101  ARAIELPNAM  ENAGALIRE  VASKTNSAG  DGTTTASVLA  REIIKLGLLT
151  VTSGANPVSV  KRGIDKTVQS  LIEELEKKAR  PVKGRDDIKA  VASISAGNDD
201  LIGTMVADAI  DKVGPDGVLV  IESSSSFETT  VDVEEGMEID  RGYISPFVVT
251  NPEKLICEFE  NARVLVTDQK  ITAIKDIIPL  LEKTTQLRAP  LLIIAEDVTG
301  EALATLVVNK  LRGILNVAAI  KAPSFGERRK  AVLQDIAILT  GAEFQANDLG
351  LLIENTSVEQ  LGIARKVIIT  KDSTQIIADA  ASKDEIQARV  QQLKKELAET
401  DSVYDTEKLA  ERIAKLSGGV  AVIKVGAATE  TELEDRLKRI  EDAKNATFAA
451  IEEGIVPGGG  AALVHLSTCV  PAIKDKLEDP  EERIGADIVQ  KALVAPASLI
501  AQNAGMEGEV  VVEKVKNSEW  EIGYNAMTDT  YENLLAAGVI  DPAKVTRCAL
551  QNAASVAGMV  LTTQAIIVVEK  AKPKAPAAAA  PEGLT I
```

Spot No.: **E7**

Protein name: **Chaperonin-60alpha**

Peptide sequences:

**K.EIAFDQSSR.A;K.LADAVGLTLGPR.G;K.LICEFENAR.V;K.AV  
LQDIAILTGAEFQANDLGLLIENTSVEQLGIAR.K;K.DSTQIIAD  
AASKDEIQAR.V**

Accession No.: **Gohir.A13G232000.1.p**

Mascot score: **329**

Sequence coverage %:**14**

Calculated Mr: **62143**

Calculated pI: **5.15**

PFF Searched Score:

Ions score is  $-10 \cdot \log(P)$ , where P is the probability that the observed match is a random event. Individual ions scores  $> 34$  indicate identity or extensive homology ( $p < 0.05$ ). Protein scores are derived from ions scores as a non-probabilistic basis for ranking protein hits.

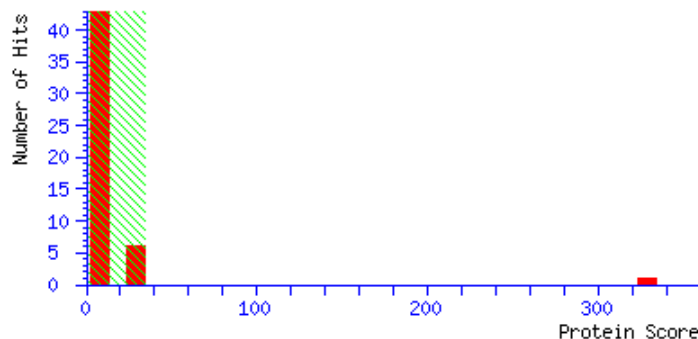

Matched peptide sequences: shown in **Bold Red**:

```
1  MASANALSSA  SILCSPNKGS  LRRKGNQRQN  QRVNYRQGN  RFGVKACAKE
51  IAFDQSSRAA  MQAGIDKLAD  AVGLTLGPRG  RNVVLDEFGS  PKVVNDGVTI
101 ARAIELPNAM  ENAGAALIRE  VASKTNSAG  DGTTASVLA  REIIKLGLLT
151 VTSGANPVS  KRGIDKTVQS  LIEELEKKAR  PVKGRDDIKA  VASISAGNDD
201 LIGTMVADAI  DKVGPDGVLS  IESSSSFETT  VDVEEGMEID  RGYISPFVFT
251 NPEKLICEFE  NARVLVTDQK  ITAIKDIPL  LEKTTQLRAP  LLIIAEDVTG
301 EALATLVVNK  LRGILNVAAI  KAPSFGERRK  AVLQDIAILT  GAEFQANDLG
351 LLIENTSVEQ  LGIARKVIIT  KDSTQIIADA  ASKDEIQARV  QQLKKELAET
401 DSVYDTEKLA  ERIAKLSGGV  AVIKVGAATE  TELEDRLRI  EDAKNATFAA
451 IEEGIVPGGG  AALVHLSTCV  PAIKDKLEDP  EERIGADIVQ  KALVAPASLI
501 AQNAGMEGEV  VVEKVKNSEW  EIGYNAMTDT  YENLLAAGVI  DPAKVTRCAL
551 QNAASVAGMV  LTTQAIVVEK  AKPKAPAAAA  PEGLTI
```

Spot No.: **E9**

Protein name: **ATP-dependent zinc metalloprotease FTSH 8**

Peptide sequences:

**R.FLEYLDKDR.V;K.AKENAPCIVFVDEIDAVGR.Q;K.ENAPCIV  
FVDEIDAVGR.Q;R.ADILDSALLRPGR.F;K.KFETDVSFDVIAMR  
.T;R.TPGFSGADLANLLNEAAILAGR.R;R.ISDSAYEIALQHIR.N**

Accession No.: **Gohir.A01G022900.1.p**

Mascot score: **600**

Sequence coverage %:**13**

Calculated Mr: **74627**

Calculated pI: **6.24**

PFF Searched Score:

Ions score is  $-10 \cdot \log(P)$ , where P is the probability that the observed match is a random event. Individual ions scores  $> 34$  indicate identity or extensive homology ( $p < 0.05$ ). Protein scores are derived from ions scores as a non-probabilistic basis for ranking protein hits.

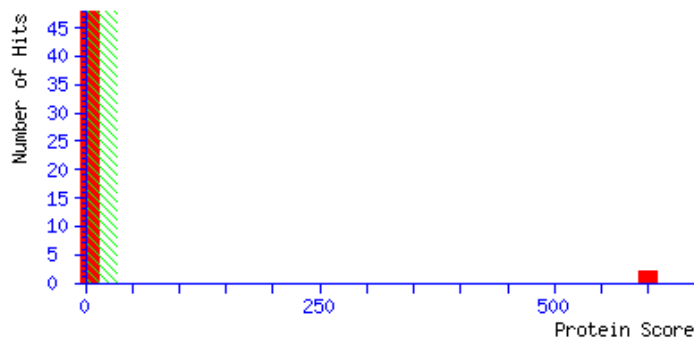

Matched peptide sequences: shown in **Bold Red**:

```
1 MAASSACLLG NGPSTHRTKS KLSKEFYGRN IVFTPAISSL GRKSNAVLVK
51 ASLKHKQHEG RRGFLKSLLG TAGIGVPALL GNGKAYADEQ GVSSSRMSYS
101 R.FLEYLDKDR VKKVDLFENG TIAIVEAVSP ELGNRVQVRV VQLPGLSQEL
151 LQKFREKNID FAAHNAQEDS GSLLFNLIGN LAFPLILIGG LFLLSRRSSG
201 GMGGPGGPGF PLAFGQSKAK FQMEPNITGVT FDDVAGVDEA KQDFMEVVEF
251 LKKPERFTAV GARIPKGVLL IGPPGTGKTL LAKAIAGEAG VPFFSISGSE
301 FVEMFVGVA SRVRDLFKKA KENAPCIVFV DEIDAVGRQR GTGIGGGNDE
351 REQTLNQLLT EMDGFEGNTG IIVIAATNRA DILDSALLRP GRFDRQVTVD
401 VPDIRGRTEI LKVHGSNKKF ETDVSFDVIA MRTPGFSGAD LANLLNEAAI
451 LAGRRGKTAI SSKEIDDSID RIVAGMEGTV MTDGKSKSLV AYHEVGHAIC
501 GTLTPGHDPV QKVTLIPRGQ ARGLTWFIPS DDPTLISKQQ LFARIVGGLG
551 GRAAEEIIFG EPEVTTGAAG DLQQITGLAK QMVVTFGMSE IGPWSLMDSS
601 AQSADVIMRM MARNSMSEKL AEDIDTAVKR ISDSAYEIAL QHIRNNREAI
651 DKIVEVLLK ETMSGDEFRA ILSEFVEIPA ENQVPPSVPT PVSV
```

Spot No.: **E12**

Protein name: **Chaperonin Cpn60/TCP-1 family**

Peptide sequences:

**K.SAENSLYVVEGMQFDR.G;R.GYISPYFVTDSEK.M;R.DLINIL  
EDAIR.S;R.KSQYLDDIAILTGGTVIR.D;K.SQYLDDIAILTGGTV  
IRDEVGLSLDK.A;K.AAVEEGIVVGGGCTLLR.L**

Accession No.: **Gohir.D10G200300.1.p**

Mascot score: **497**

Sequence coverage %:**13**

Calculated Mr: **64709**

Calculated pI: **5.72**

PFF Searched Score:

Ions score is  $-10 \cdot \log(P)$ , where P is the probability that the observed match is a random event. Individual ions scores  $> 34$  indicate identity or extensive homology ( $p < 0.05$ ). Protein scores are derived from ions scores as a non-probabilistic basis for ranking protein hits.

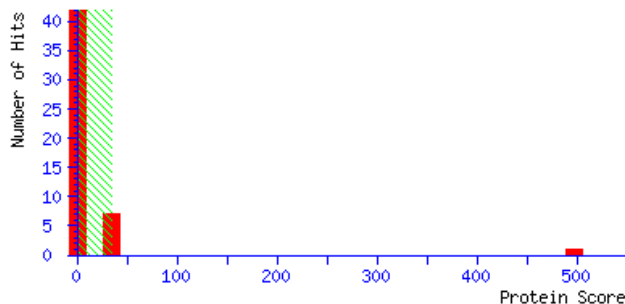

Matched peptide sequences: shown in **Bold Red**:

```
1 MASTFTAMSS VGSFVAPNGL VMDKKLSSSS NRLSSLASIS TSSFVSRNV
51 VLRRSRLPKI SAAKELHFNK DGS AIKRLQT GVNKLADLVG VTLGPKGRNV
101 VLESKYGSPK IVNDGVTVAK EVELEDPVEN IGAKLVRQAA AKTNDLAGDG
151 TTTSVLAQG LIAEGVKVVA AGANPVLITR GIEKTSRALV SELKAIKVEV
201 EDSELADVAA VSAGNNNEVG NMIAEAMSKV GRKGVVTL EE GKSAENSLYV
251 VEGMQFDRGY ISPYFVTDSE KMAVEYENCK LLLVDKKITN ARDLINILED
301 AIRSGYPILI IAEDIEQEAL ATLVVNKLRG ALKIAALKAP GFGERKSQYL
351 DDIAILTGGT VIRDEVGLSL DKASKEVLGH ASKVVLTKDT TTIVGDGSTQ
401 EAVNKRVVQI KNLIEAAEQD YEKEKLNRI AKLSGGVAVI QVGAQTETEL
451 KEKKLRVEDA LNATKAAVEE GIVVGGGCTL LRLASKVD AI KDSLNDDEEK
501 VGADIVKRAL SYPLKLIAKN AGVNGSVVSE KVLSNDNPRY GFNAATGNYE
551 DLMSAGIIDP TKVVRCCLEH AASVAKTFLM SDCVVVEIKE PEPVPAGNPM
601 DNSGYGY
```

Spot No.: E14

Protein name: Chaperonin Cpn60/TCP-1 family

Peptide sequences:

K.SAENSLYVVEGMQFDR.G;R.GYISPYFVTDSEK.M;R.DLINIL  
EDAIR.S;R.KSQYLDDIAILTTGGTVIR.D;K.AAVEEGIVVGGGCT  
LLR.L

Accession No.: Gohir.D10G200300.1.p

Mascot score: 340

Sequence coverage %:12

Calculated Mr: 64709

Calculated pI: 5.72

PFF Searched Score:

Ions score is  $-10 \cdot \log(P)$ , where P is the probability that the observed match is a random event. Individual ions scores  $> 34$  indicate identity or extensive homology ( $p < 0.05$ ). Protein scores are derived from ions scores as a non-probabilistic basis for ranking protein hits.

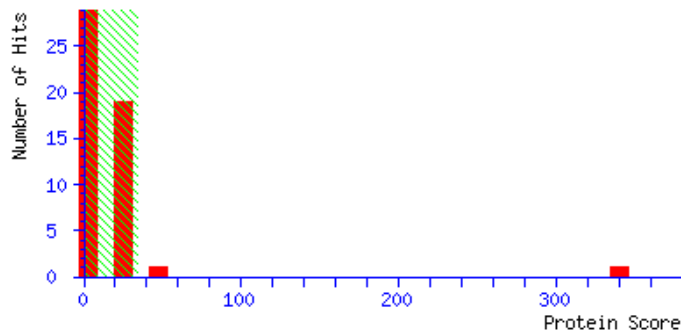

Matched peptide sequences: shown in **Bold Red**:

```
1 MASTFTAMSS VGSFVAPNGL VMDKKLSSSS NRLSSLASIS TSSFVSRNRV
51 VLRRSRLPKI SAAKELHFNK DGSAIKRLQT GVNKLADLVG VTLGPKGRNV
101 VLESKYGSPK IVNDGVTVAK EVELEDPVEN IGAKLVRQAA AKTNDLAGDG
151 TTTSVLAQG LIAEGVKVVA AGANPVLITR GIEKTSRALV SELKAIKEV
201 EDSELADVAA VSAGNNNEVG NMIAEAMSKV GRKGVVTL EE GKSAENSLYV
251 VEGMQFDRGY ISPYFVTDSE KMAVEYENCK LLLVDKKITN ARDLINILED
301 AIRSGYPILI IAEDIEQEAL ATLVVNKLRG ALKIAALKAP GFGERKSQYL
351 DDIAILTTGGT VIRDEVGLSL DKASKEVLGH ASKVVLTKDT TTIVGDGSTQ
401 EAVNKRVVQI KNLIEAAEQD YEKEKLNRI AKLSGGVAVI QVGAQTETEL
451 KEKKLRVEDA LNATKAAVEE GIVVGGGCTL LRLASKVD AI KDSLNDDEEK
501 VGADIVKRAL SYPLKLI AKN AGVNGSVVSE KVLSDNPRY GFNAATGNYE
551 DLMSAGIIDP TKVVRCCLEH AASVAKTFLM SDCVVVEIKE PEPVPAGNPM
601 DNSGYGY
```

Spot No.: **E15**

Protein name: **Chaperonin-60alpha**

Peptide sequences:

**K.EIAFDQSSR.A;K.LADAVGLTLGPR.G;R.AIELPNAMENAGAA  
LIR.E;K.LVCEFENAR.V**

Accession No.: **Gohir.A05G105800.1.p**

Mascot score: **97**

Sequence coverage %:**8**

Calculated Mr: **62013**

Calculated pI: **5.26**

PFF Searched Score:

Ions score is  $-10 \cdot \log(P)$ , where P is the probability that the observed match is a random event. Individual ions scores  $> 34$  indicate identity or extensive homology ( $p < 0.05$ ). Protein scores are derived from ions scores as a non-probabilistic basis for ranking protein hits.

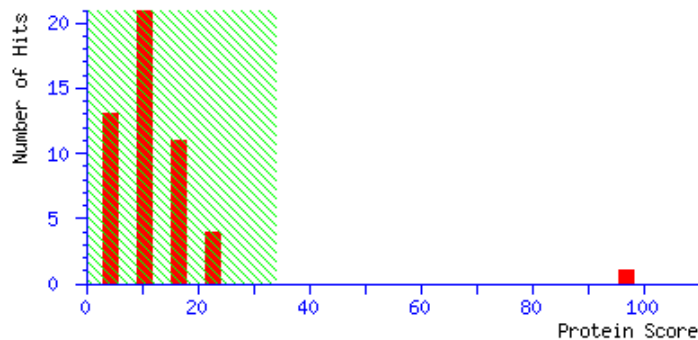

Matched peptide sequences: shown in **Bold Red**:

```
1  MASANALSSA  SVLCTSKQGS  LGRRGNQRQN  QRVNYRQGNS  RFGVRACAKE
51  IAFDQSSRAA  MQAGIDKLAD  AVGLTLGPRG  RNVVLDEYGS  PKVVNDGVTI
101  ARAIELPNAM  ENAGALIRE  VASKTNSAG  DGTTTASILA  REIIKLGLLS
151  VTSGANPVSV  KRGIDKTVQR  LVEELEKKAR  PVKGRDDIKA  VASVSSGND
201  LIGTMIADAI  DKVGPDGVLS  IESSSSFETT  VDVEEGMEID  RGYISPFVIT
251  NPEKLVCEFE  NARVLVTDQK  ISAIKDIIPL  LEKTTQLRSP  LLIIAEDVSG
301  EALATLVVNK  LRGILNVAAI  KAPGFGERRK  ALLQDIAILT  GAEFQASDLG
351  LLVENTSVEQ  LGIARKVIIT  KDSTQLIAEA  ASKDEIQTRV  AQLKKELAQT
401  DSVYDSEKLA  ERIAKLSSGV  AVIKVGAATE  TELEDRLRI  EDAKNATFAA
451  IEEGIVPGGG  AALVHLSSCV  PAIKEKLEDA  DERLGADIVQ  KALVAPALLI
501  AQNAGMEGEV  VVEKVKSEW  EVGYNAMTDK  FENLLEAGVI  DPAKVTRCAL
551  QNASSVAGMV  LTTQAIVVEK  PKPKASAAAA  PSGLAV
```



Spot No.: **E16**

Protein name: **ATP synthase subunit beta**

Peptide sequences:

**K.IVNTGTVLQVGDGIAR.I;K.IAQIPVSEAYLGR.V;R.LIESPAP  
GIISR.R;K.ASSVAQVVTTFQER.G**

Accession No.: **Gohir.A03G084900.1**

Mascot score: **201**

Sequence coverage %:**10**

Calculated Mr: **55437**

Calculated pI: **5.25**

PFF Searched Score:

Ions score is  $-10 \cdot \log(P)$ , where P is the probability that the observed match is a random event. Individual ions scores  $> 35$  indicate identity or extensive homology ( $p < 0.05$ ). Protein scores are derived from ions scores as a non-probabilistic basis for ranking protein hits.

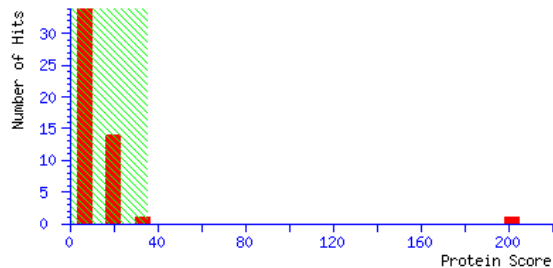

Matched peptide sequences: shown in **Bold Red**:

```
1 MVTIRADEIS NIIRERIEQY NREVKIVNTG TVLQVGDGIA RIHGLDEVMA
51 GELVEFEEGT IGIALNLESN NVGVVLMGDG LMIQEGSSVK ATGKIAQIPV
101 SEAYLGRVIN ALAKPIDGRG EISASESRLI ESPAPGIISR RSVYEPLQTG
151 LIAIDSMIPI GRGQRELIIG DRQTGKTAVA TDILNQQGQ NVICVYVAIG
201 QKASSVAQVVTTFQERGAME YTIIVVAETAD SPATLQYLAP YTGAALAEYF
251 MYRERHTLII YDDLKQAQA YRQMSLLRR PPGREAYPGD VFYLHSRLLE
301 RAAKSSSQLG EGSMTALPIV ETQSGDVSAY IPTNVISITD GQIFLSADLF
351 NAGIRPAINV GISVSRVGS AAIKAMKQVA GKSKLELAQF AELEAFAQFA
401 SLDKATQNQ LARGQLREL LKQSQSAPLT VAEQISTITYT GTNGYLDLSLE
451 IGQVRKFLVE LRTYLKTNKP QFQEIISSTK TFTEEAETLL KDAIQDQMER
501 FRLQEQQL
```



Spot No.: **E18**

Protein name: **ATPase V1 complex subunit B protein**

Peptide sequences:

**K.YQEIVNIR.L;R.VTLFLNLANPTIER.I;K.FVTQGAYDTR.N**

Accession No.: **Gohir.A01G109000.1.p**

Mascot score: **81**

Sequence coverage %:**6**

Calculated Mr: **54369**

Calculated pI: **4.96**

PFF Searched Score:

Ions score is  $-10 \cdot \log(P)$ , where P is the probability that the observed match is a random event. Individual ions scores  $> 34$  indicate identity or extensive homology ( $p < 0.05$ ). Protein scores are derived from ions scores as a non-probabilistic basis for ranking protein hits.

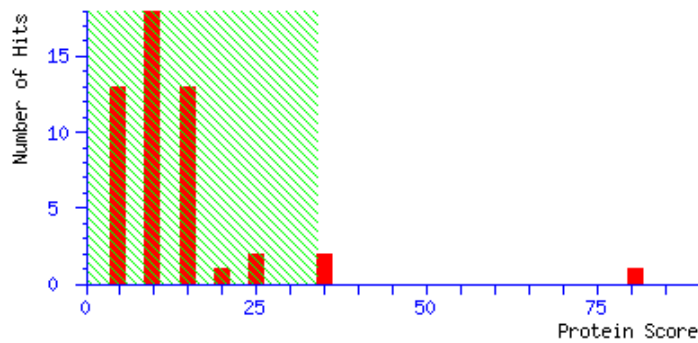

Matched peptide sequences: shown in **Bold Red**:

```
1 MGAEKNFIDM EEGTLEIGME YRTVSGVAGP LVILDKVKGP KYQEIVNIRL
51 GDGTRRGQV LEVDGEKAVV QVFEGTSGID NKYTTVQFTG EVLKTPVSLD
101 MLGRIFNGSG KPIDNGPPIL PEAYLDISGS SINPSERTYP EEMIQTGIST
151 IDVMNSIARG QKIPLFSAAG LPHNEIAAQI CRQAGLVKRL EKSDNLLDDQ
201 EEDNFIAIVFA AMGVNMQTAQ FFKRDFEENG SMERVTLFLN LANDPTIERI
251 ITPRIALTTA EYLAYECGKH VLVILDMSS YADALREVSA AREEVPGRRG
301 YPGYMYTDLA TIYERAGRIE GRKGSITQIP ILTMPNDDIT HPTPDLTGVI
351 TEGQIYIDRQ LHNQRQIYPII NVLPSSLRLM KSAIGEGMTR RDHADVSNQL
401 YANYAIGKDV QAMKAVVGEE ALSSEDLLEYL EFLDKFERKF VTQGAYDTRN
451 IFQSLDLAWT LLRIFPRELL HRIPAKTLDQ YYSRES
```

Spot No.: **E19**

Protein name: **ATP synthase subunit alpha**

Peptide sequences:

**R.ADEISNIIR.E;K.IVNTGTVLQVGDGIAR.I;K.IAQIPVSEAYLG  
R.V;R.LIESPAPGIISR.R;R.SVYEPLQTGLIAIDSMIPIGR.G;K.AS  
SVAQVVTTFFQER.G;R.KFLVELR.T**

Accession No.: **Gohir.D01G031800.1.p**

Mascot score: **561**

Sequence coverage %:**18**

Calculated Mr: **55437**

Calculated *pI*: **5.25**

PFF Searched Score:

Ions score is  $-10 \cdot \log(P)$ , where P is the probability that the observed match is a random event. Individual ions scores  $> 35$  indicate identity or extensive homology ( $p < 0.05$ ). Protein scores are derived from ions scores as a non-probabilistic basis for ranking protein hits.

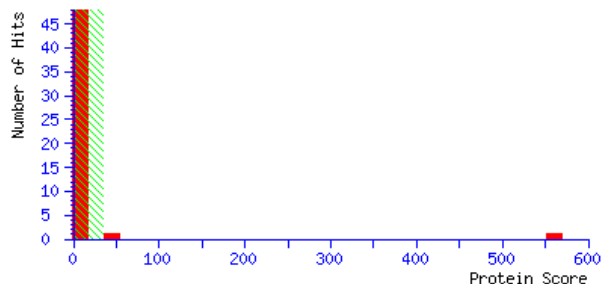

Matched peptide sequences: shown in **Bold Red**:

```
1 MVTIRADEIS NIIRERIEQY NREVKIVNTG TVLQVGDGIA RIHGLDEVMA
51 GELVEFEEGT IGIALNLESN NVGVVLMGDG LMIQEGSSVK ATGKIAQIPV
101 SEAYLGRVIN ALAKPIDGRG EISASESRLI ESPAPGIISR RSVYEPLQTG
151 LIAIDSMIPI GRGQRELIIG DRQTGKTAVA TDTILNQQGQ NVICVYVAIG
201 QKASSVAQVV TTFQERGAME YTIVVAETAD SPATLQYLAP YTGAALAEYF
251 MYRERHTLII YDDLSKQAQA YRQMSLLRR PPGREAYPGD VFYLHSRLE
301 RAAKSSSQLG EGSMTALPIV ETQSGDVSAY IPTNVISITD GQIFLSADLF
351 NAGIRPAINV GISVSRVGS AAIKAMKQVA GKSKLELAQF AELEAFAQFA
401 SDDLKATQNQ LARGQRLREL LKQSQSAPLT VAEQISTITYT GTNGYLDLSLE
451 IGQVRKFLVE LRTYLKTNKP QFQEIISSTK TFTEEAETLL KDAIQDQMER
501 FRLQEQL
```

Spot No.: **E20**

Protein name: **ATP synthase subunit alpha**

Peptide sequences:

**K.IVNTGTVLQVGDGIAR.I;K.IAQIPVSEAYLGR.V;R.LIESPAP  
GIISR.R;R.SVYEPLQTGLIAIDSMIPIGR.G;K.ASSVAQVVTTTFQ  
ER.G;K.QSQSAPLTVAEQISTIYTG TNGYLD SLEIGQVR.K**

Accession No.: **Gohir.D01G031800.1.p**

Mascot score: **542**

Sequence coverage %:**21**

Calculated Mr: **55437**

Calculated *pI*: **5.25**

**PFF Searched Score:**

Ions score is  $-10 \cdot \log(P)$ , where P is the probability that the observed match is a random event. Individual ions scores  $> 34$  indicate identity or extensive homology ( $p < 0.05$ ). Protein scores are derived from ions scores as a non-probabilistic basis for ranking protein hits.

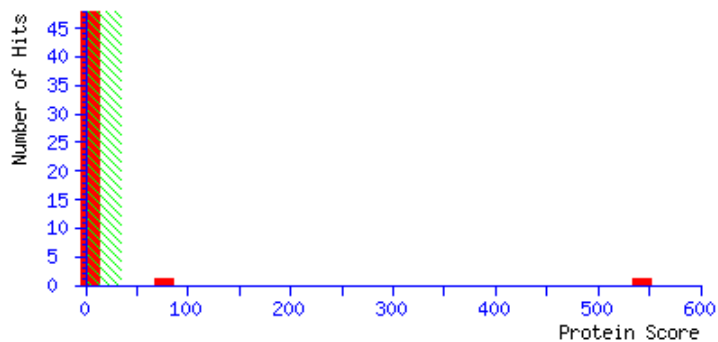

**Matched peptide sequences: shown in Bold Red:**

```
1 MVTIRADEIS NIIRERIEQY NREVKIVNTG TVLQVGDGIA RIHGLDEVMA
51 GELVEFEEGT IGIALNLESN NVGVVLMGDG LMIQEGSSVK ATGKIAQIPV
101 SEAYLGRVIN ALAKPIDGRG EISASESRLI ESPAPGIISR RSVYEPLQTG
151 LIAIDSMIPI GRGQRELIIG DRQTGKTAVA TDTILNQQGQ NVICVYVAIG
201 KASSVAQVV TTFQERGAME YTIVVAETAD SPATLQYLAP YTGAAALAEYF
251 MYRERHTLII YDDLKQAQA YRQMSLLRR PPGREAYPGD VFYLHSRLE
301 RAAKSSSQLG EGSMTALPIV ETQSGDVSAY IPTNVISITD GQIFLSADLF
351 NAGIRPAINV GISVSRVGS A QIKAMKQVA GKSKLELAQF AELEAFAQFA
401 SDDLKATQNQ LARGQLREL LKQSQSAPLT VAEQISTIYT GTNGYLD SLE
451 IGQVRKFLVE LRTYLKTNKP QFQEIISSTK TFTEEAETLL KDAIQDQMER
501 FRLQEQL
```

Spot No.: **E21**

Protein name: **ATP synthase subunit alpha**

Peptide sequences:

**R.ADEISNIIR.E;K.IVNTGTVLQVGDGIAR.I;K.IAQIPVSEAYLG  
R.V;R.LIESPAPGIISR.R;R.SVYEPLQTGLIAIDSMIPIGR.G;K.AS  
SVAQVVTTTFQER.G;K.ATQNQLAR.G**

Accession No.: **Gohir.D01G031800.1.p**

Mascot score: **449**

Sequence coverage %: **18**

Calculated Mr: **55437**

Calculated pI: **5.25**

PFF Searched Score:

Ions score is  $-10 \cdot \log(P)$ , where P is the probability that the observed match is a random event. Individual ions scores  $> 35$  indicate identity or extensive homology ( $p < 0.05$ ). Protein scores are derived from ions scores as a non-probabilistic basis for ranking protein hits.

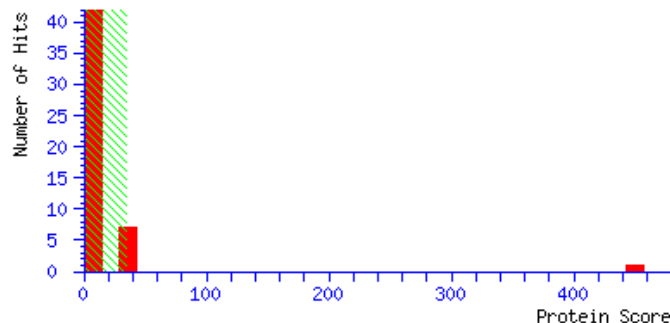

Matched peptide sequences: shown in **Bold Red**:

```
1  MVTIRADEIS NIIRERIEQY NREVKIVNTG TVLQVGDGIA RIHGLDEVMA
51  GELVEFEEGT IGIALNLESN NVGVVLMGDG LMIQEGSSVK ATGKIAQIPV
101 SEAYLGRVIN ALAKPIDGRG EISASESRLI ESPAPGIISR RSVYEPLQTG
151 LIAIDSMIPI GRGQRELIIG DRQTGKTAVA TDTILNQGGQ NVICVYVAIG
201 QKASSVAQVV TTFQERGAME YTIVVAETAD SPATLQYLAP YTGAAALAEYF
251 MYRERHTLII YDDLKQQAQA YRQMSLLRR PPGREAYPGD VFYLSRLLLE
301 RAAKSSSQLG EGSMTALPIV ETQSGDVSAY IPTNVISITD GQIFLSADLF
351 NAGIRPAINV GISVSRVGS AAIKAMKQVA GSKLELAQF AELEAFAQFA
401 SDDLKATQNQ LARGQLREL LKQSQSAPLT VAEQISTIIYT GTNGYLDLSLE
451 IGQVRKFLVE LRTYLKTNKP QFQEIISSTK TFTEEAETLL KDAIQDQMER
501 FRLQEQL
```

Spot No.: **E22**

Protein name: **ATP synthase subunit beta**

Peptide sequences:

**R.GMEVIDTGAALSVPVGGATLGR.I;K.VVDLLAPYR.R;K.AHG  
GVSVFGGVGER.T;K.VALVYGQMNEPPGAR.M;R.VGLTALTM  
AEYFR.D;R.DVNEQDVLLFIDNIFR.F;R.FVQAGSEVSALLGR.M**

Accession No.: **Gohir.A03G084900.1.p**

Mascot score: **660**

Sequence coverage %:**20**

Calculated Mr: **53611**

Calculated *pI*: **5.22**

PFF Searched Score:

Ions score is  $-10 \cdot \log(P)$ , where P is the probability that the observed match is a random event. Individual ions scores  $> 34$  indicate identity or extensive homology ( $p < 0.05$ ). Protein scores are derived from ions scores as a non-probabilistic basis for ranking protein hits.

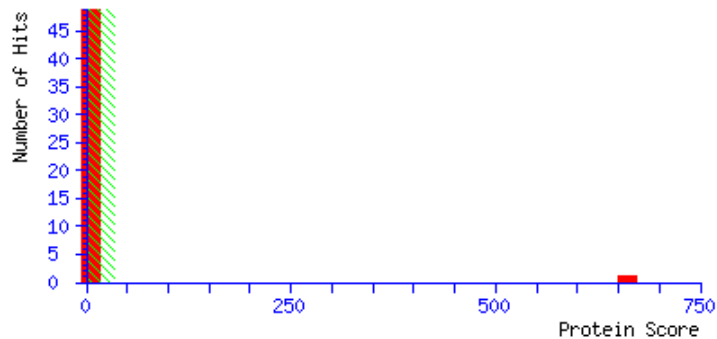

Matched peptide sequences: shown in **Bold Red**:

```
1  MKINPTTSVP  GVSTLEKENL  GRISQIIGPV  LDVAFPPGKM  PNIYNALVVK
51  GQDTAGQQIN  VTCEVQQLLG  NNRVRVAMS  ATDGLTRGME VIDTGAALSV
101 PVGGATLGRI  FNVLGEPVDN  LGPVDTRTTS  PIHKSAPAFI  QLDTKLSIFE
151  TGIKVVDLLA  PYRRGGKIGL  FGGAGVGKTV  LIMELINNIA  KAHGGVSVFG
201  GVGERTREGN  DLYMEMKESG  VINEQNLAES  KVALVYGQMN  EPPGARMRVG
251  LTALTMAEYF  RDVNEQDVLL  FIDNIFRFVQ  AGSEVSALLG  RMPSAVGYQP
301  TLSTEMGTLQ  ERITSTKEGS  ITSIQAVYVP  ADDLTDPAVA  TTFAPLDATT
351  VLSRGLAAG  IYPAVDPLDS  TSTMLQPRIV  GEEHYETAQR  VKQTLQRYKE
401  LQDIIAILGL  DELSEEDRLT  VARARKIERF  LSQFFFVAEV  FTGSPGKYVG
451  LAETIRGFKL  ILSGELDGLP  EQAFYLVGNI  DEATAKATNL  EMESKLLK
```

Spot No.: **E23**

Protein name: **ATP synthase subunit beta**

Peptide sequences:

**R.GMEVIDTGAALSVPVGGATLGR.I;K.VVDLLAPYR.R;K.AHG  
GVSVFGGVGER.T;K.VALVYQMQMNEPPGAR.M;R.VGLTALTM  
AEYFR.D;R.DVNEQDVLLFIDNIFR.F;R.FVQAGSEVSALLGR.M**

Accession No.: **Gohir.A03G084900.1.p**

Mascot score: **743**

Sequence coverage %:**20**

Calculated Mr: **53611**

Calculated *pI*: **5.22**

**PFF Searched Score:**

Ions score is  $-10 \cdot \log(P)$ , where P is the probability that the observed match is a random event. Individual ions scores  $> 34$  indicate identity or extensive homology ( $p < 0.05$ ). Protein scores are derived from ions scores as a non-probabilistic basis for ranking protein hits.

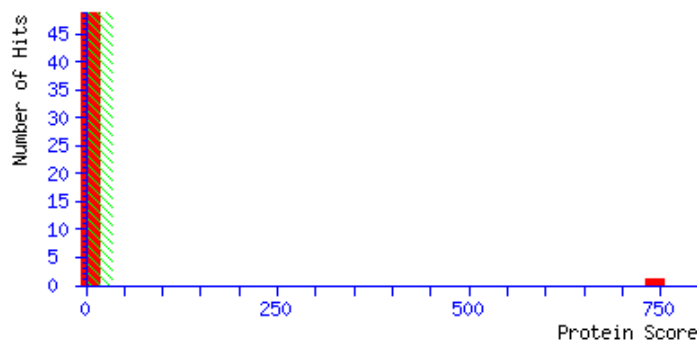

**Matched peptide sequences: shown in Bold Red:**

```
1  MKINPTTSVP  GVSTLEKENL  GRISQIIGPV  LDVAFPPGKM  PNIYNALVVK
51  QDTAGQQIN  VTCEVQQLLG  NNRVRVAVMS  ATDGLTRGME  VIDTGAALSV
101 PVGGATLGRI  FNVLGEPVDN  LGPVDTRTTS  PIHKSAPAFI  QLDTKLSIFE
151 TGIKVVDLLA  PYRRGGKIGL  FGGAGVGKTV  LIMELINNIA  KAHGGVSVFG
201 GVGERTREGN  DLYMEMKESG  VINEQNLAES  KVALVYQMQM  EPPGARMRVG
251 LTALTMAEYF  RDVNEQDVLL  FIDNIFRFVQ  AGSEVSALLG  RMPSAVGYQP
301  TLSTEMGTLQ  ERITSTKEGS  ITSIQAVYVP  ADDLTDPAFA  TTF AHLDATT
351  VLSRGLAAG  IYPAVDPLDS  TSTMLQPRIV  GEEHYETAQR  VKQTLQRYKE
401  LQDIIAILGL  DELSEEDRLT  VARARKIERF  LSQFFFVAEV  FTGSPGKYVG
451  LAETIRGFKL  ILSGELDGLP  EQAFYLVGNI  DEATAKATNL  EMESKLLK
```

Spot No.: **E24**

Protein name: **Tubulin alpha-3**

Peptide sequences:

**R.AVFVDLEPTVIDEVR.T;R.LISQTISSLTSLR.F;R.FDGAINVD  
ITEFQTNLVPYPR.I;R.AVCMISNNTAVAEVFAR.I;R.AFVHWYV  
GEGMEEGEFSEAR.E**

Accession No.: **Gohir.A11G076100.1**

Mascot score: **369**

Sequence coverage %: **19**

Calculated Mr: **50264**

Calculated pI: **5.01**

PFF Searched Score:

Ions score is  $-10 \cdot \log(P)$ , where P is the probability that the observed match is a random event. Individual ions scores  $> 33$  indicate identity or extensive homology ( $p < 0.05$ ). Protein scores are derived from ions scores as a non-probabilistic basis for ranking protein hits.

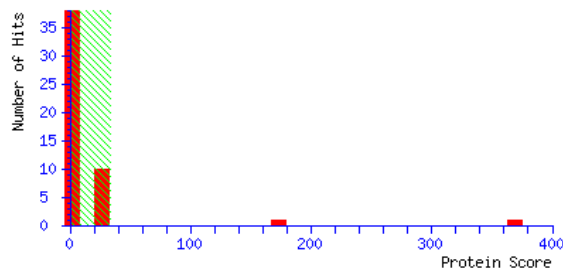

Matched peptide sequences: shown in **Bold Red**:

```
1 MREIISVHIG QAGIQVGNCS WELYCLEHVI HPDGTMPSDT SMGVAHDAFN
51 TFFSETGSGK HWPRAVFVDL EPTVIDEVRT GPYRQLFHPE QLISGKEDAA
101 NNFARGHYTI GKEIVDLCLD RVRKLDNCT GLQGFNVFNA VGGGTGSGLG
151 SLLLERLSVD YGKSKLGFT IYPSPQVSTA VVEPYNSVLS THSLEHTDV
201 AVLLDNEAIY DICRRSLDIE RPTYTNLNRL ISQTISSLT SLRFDGAINV
251 DITEFQTNLV PYPRIHFMLS SYAPVISA EK AYHEQISVPE ITNAVFEPSS
301 MMAKCDPRHG KYMACCLMYR GDVVPKDVNA AVATIKTKRT VQFVDWCPTG
351 FKCGINYQPP AVVPGDLAK VQRAVCMISN NTAVAEVFAR IDHKFDLMYS
401 KRAFVHWYVG EGMEEGEFSE AREDLAALEK DYEEVGAEGG DDEEEGEEY
```



Spot No.: F3

Protein name: Ribulose biphosphate carboxylase

Peptide sequences:

K.GLAYDISDDQQDITR.G;K.MCALFINDLDAGAGR.M;R.VPIIV  
TGNDFSTLYAPLIR.D;K.FYWAPTR.D;K.LVDTFPGQSIDFFGAL  
R.A;K.LLEYGNMLVAEQENVKR.V

Accession No.: Gohir.A06G166200.1.p

Mascot score: 674

Sequence coverage %:19

Calculated Mr: 51953

Calculated pI: 5.37

PFF Searched Score:

Ions score is  $-10 \cdot \log(P)$ , where P is the probability that the observed match is a random event. Individual ions scores  $> 34$  indicate identity or extensive homology ( $p < 0.05$ ). Protein scores are derived from ions scores as a non-probabilistic basis for ranking protein hits.

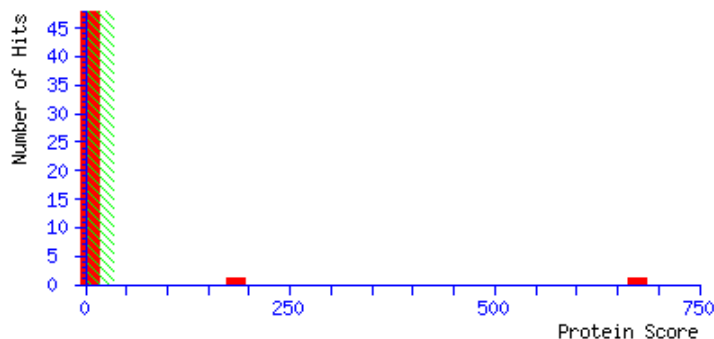

Matched peptide sequences: shown in **Bold Red**:

```
1 MAAAISTVAA AAAANRALGV SVPTSAFMGK KVSSRFNNTR QVPSGSFKVM
51 AAEKEIDEET QTEKDRWGL AYDISDDQQD ITRGKGMVDS LFAQPMNDGT
101 HYAVMSSYEY ISQGLKTYNL DNNMDGFYIA PAFMDKLVVH ISKNFMSLPN
151 IKVPLILGIW GGKGQKSFQ CELVFAKMG I NPIMMSAGEL ESGNAGEPAK
201 LIRQRYREAA DIIKKGMCA LFINDLDAGA GRMGTTQYT VNNQMVNATL
251 MNIADNPTNV QLPGMYNKEE NPRVPIIVTG NDFSTLYAPL IRDGRMEKFY
301 WAPTRDDRIG VCKGIFRTDG VRDEDIVKLV DTFPGQSIDF FGALRARVYD
351 DEVRKWISEV GVASVGKKLV NSREGPPTFE QPKMTIEKLL EYGNMLVAEQ
401 ENVKRVQLAD KYLSEAALGE ANEDSINRGT FYGKAAQQVG VPVPEGCTDP
451 NADNFDPTAR SDDGTCTYKF
```



Spot No.: F4

Protein name: Regulatory particle triple-A ATPase 5A

Peptide sequences:

**K.DSYLILDTLPSEYDSR.V;R.KIEFPHPTTEEAR.A**

Accession No.: Gohir.A11G294500.1.p

Mascot score: 113

Sequence coverage %:6

Calculated Mr: 47690

Calculated pI: 4.99

PFF Searched Score:

Ions score is  $-10 \cdot \log(P)$ , where P is the probability that the observed match is a random event. Individual ions scores  $> 34$  indicate identity or extensive homology ( $p < 0.05$ ). Protein scores are derived from ions scores as a non-probabilistic basis for ranking protein hits.

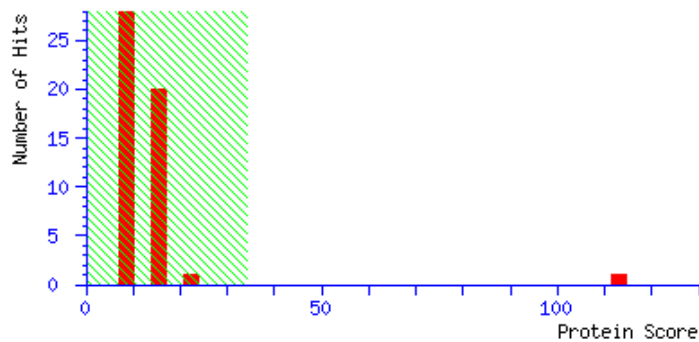

Matched peptide sequences: shown in **Bold Red**:

```
1 MATAMVEDSS FEEDQLASMT TEDIVRASRL LDNEIRILKE EMQRTNLELD
51 SYKEKVKENQ EKIKLNKQLP YLVGNIVEIL EMNPEDEAEE DGANIDLDSQ
101 RKGKCVVLKT STRQTIFLPV VGLVDPDKLK PGDLVGVNKD SYLILDTLPS
151 EYDSRVKAME VDEKPTEDYN DIGGLEKQIQ ELVEAIVLPM THKERFQKLG
201 VRPPKGVLLY GPPGTGKTLM ARACAAQTNA TFLKLAGPQL VQMFIGDGAK
251 LVRDAFQLAK EKSPCIIFID EIDAIGTKRF DSEVSGDREV QRTMLELLNQ
301 LDGFSSDERI KVIAATNRAD ILDPALMRSG RLDRKIEFPH PTEEARARIL
351 QIHSRKMN VH PDVNFEELAR STDDFNGAQL KAVCVEAGML ALRRDATEVN
401 HEDFNEGIIQ VQAKKKASLN YYA
```

**Spot No.: F5**

**Protein name: Ribulose biphosphate carboxylase**

**Peptide sequences:**

**K.GLAYDISDDQQDITR.G;K.MCALFINDLDAGAGR.M;R.VPIIV  
TGNDFSTLYAPLIR.D;K.FYWAPTR.D;K.LVDTFPGQSIDFFGAL  
R.A;K.LLEYGNMLVAEQENVKR.V**

**Accession No.: Gohir.A06G166200.1**

**Mascot score: 686**

**Sequence coverage %:19**

**Calculated Mr: 51953**

**Calculated pI: 5.37**

**PFF Searched Score:**

Ions score is  $-10 \cdot \log(P)$ , where P is the probability that the observed match is a random event. Individual ions scores  $> 34$  indicate identity or extensive homology ( $p < 0.05$ ). Protein scores are derived from ions scores as a non-probabilistic basis for ranking protein hits.

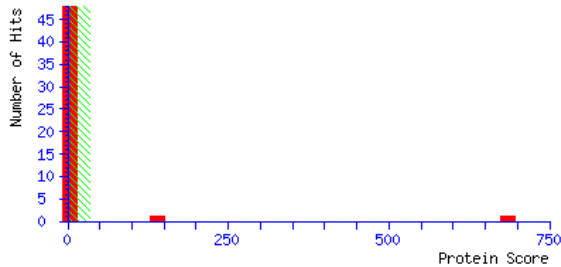

**Matched peptide sequences: shown in Bold Red:**

```
1 MAAAISTVAA AAAANRALGV SVPTSAFMGK KVSSRFNNTR QVPSGSFKVM
51 AAEKEIDEET QTEKDRWGL AYDISDDQQD ITRGKGMVDS LFQAPMNDGT
101 HYAVMSSYEY ISQGLKTYNL DNNMDGFYIA PAFMDKLVVH ISKNFMSLPN
151 IKVPLILGIW GKGQKSFQ CELVFAKMG I NPIMMSAGEL ESGNAGEPAK
201 LIRQRYEAA DIIKKGMCA LFINDLDAGA GRMGTTQYT VNNQMVNATL
251 MNIADNPTNV QLPGMYNKEE NPRVPIIVTG NDFSTLYAPL IRDGRMEKFY
301 WAPTRDDRIG VCKGIFRTDG VRDEDIVKLV DTFPGQSIDF FGALRARVYD
351 DEVRKWISEV GVASVGKLV NSREGPPTFE QPKMTIEKLL EYGNMLVAEQ
401 ENVKRVQLAD KYLSEAAALGE ANEDSINRGT FYGKAAQVG VPVPEGCTDP
451 NADNFDPTAR SDDGTCTYKF
```

Spot No.: **F6**

Protein name: **Ribulose biphosphate carboxylase**

Peptide sequences:

**K.GLAYDISDDQQDITR.G;K.MCALFINDLDAGAGR.M;R.VPIIV  
TGNDFSTLYAPLIR.D;K.FYWAPTR.D;K.LVDTFPGQSIDFFGAL  
R.A;K.LLEYGNMLVAEQENVKR.V**

Accession No.: **Gohir.A06G166200.1.p**

Mascot score: **721**

Sequence coverage %:**19**

Calculated Mr: **51953**

Calculated *pI*: **5.37**

PFF Searched Score:

Ions score is  $-10 \cdot \log(P)$ , where *P* is the probability that the observed match is a random event. Individual ions scores  $> 34$  indicate identity or extensive homology ( $p < 0.05$ ). Protein scores are derived from ions scores as a non-probabilistic basis for ranking protein hits.

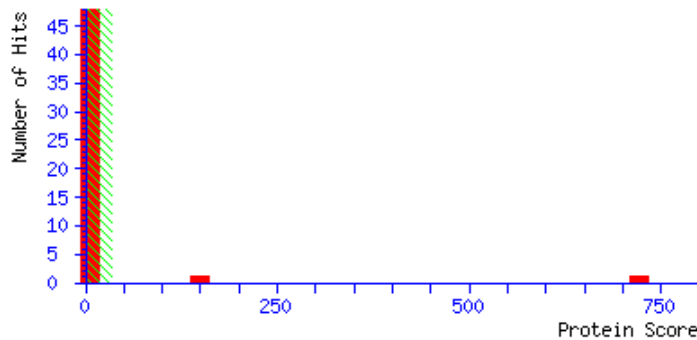

Matched peptide sequences: shown in **Bold Red**:

```
1  MAAAISTVAA  AAAANRALGV  SVPTSAFMGK  KVSSRFNNTR  QVPSGSFKVM
51  AAEKEIDEET  QTEKDRWKGL  AYDISDDQQD  ITRGKGMVDS  LFAQPMNDGT
101 HYAVMSSY EY  ISQGLKTYNL  DNNMDGFYIA  PAFMDKLVVH  ISKNFMSLPN
151 IKVPLILGIW  GGKGQKSFQ  CELVFAKMG I  NPIMMSAGEL  ESGNAGEPAK
201 LIRQRYREAA  DIIKKGKMCA  LFINDLDAGA  GRMGGTTQYT  VNNQMVNATL
251 MNIADNPTNV  QLPGMYNKEE  NPRVPIIVTG  NDFSTLYAPL  IRDGRMEKFY
301 WAPTRDDRIG  VCKGIFRTDG  VRDEDIVKLV  DTFPGQSIDF  FGALRARVYD
351 DEVRKWISEV  GVASVGKLV  NSREGPPTFE  QPKMTIEKLL  EYGNMLVAEQ
401 ENVKRVQLAD  KYLSEAALGE  ANEDSINRGT  FYGKAAQQVG  VVPEGCTDP
451 NADNFDPTAR  SDDGTCTYKF
```

Spot No.: **F7**

Protein name: **Ribulose biphosphate carboxylase**

Peptide sequences:

**K.GLAYDISDDQQDITR.G;K.MCALFINDLLDAGAGR.M;R.VPIIV  
TGNDFSTLYAPLIR.D;K.FYWAPTR.D;K.LVDTFPGQSIDFFGAL  
R.A;K.LLEYGNMLVAEQENVKR.V**

Accession No.: **Gohir.A06G166200.1.p**

Mascot score: **605**

Sequence coverage %: **19**

Calculated Mr: **51953**

Calculated pI: **5.37**

PFF Searched Score:

Ions score is  $-10 \cdot \log(P)$ , where P is the probability that the observed match is a random event. Individual ions scores  $> 34$  indicate identity or extensive homology ( $p < 0.05$ ). Protein scores are derived from ions scores as a non-probabilistic basis for ranking protein hits.

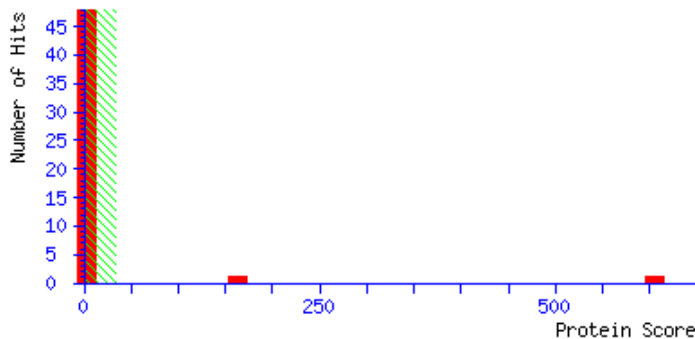

Matched peptide sequences: shown in **Bold Red**:

```
1 MAAAISTVAA AAAANRALGV SVPTSAFMGK KVSSRFNNTR QVPSGSFKVM
51 AAEKEIDEET QTEKDRWKGL AYDISDDQQD ITRGKGMVDS LFQAPMNDGT
101 HYAVMSSYEY ISQGLKTYNL DNNMDGFYIA PAFMDKLVVH ISKNFMSLPN
151 IKVPLILGIW GKGQKSFQ CELVFAKMG I NPIMMSAGEL ESGNAGEPAK
201 LIRQYREAA DIIKKGKMCA LFINDLDAGA GRMGGTTQYT VNNQMVNATL
251 MNIADNPTNV QLPGMYNKEE NPRVPIIVTG NDFSTLYAPL IRDGRMEKFY
301 WAPTRDDRIG VCKGIFRTDG VRDEDIVKLV DTFPGQSIDF FGALRARVYD
351 DEVRKWISEV GVASVGKKLV NSREGPPTFE QPKMTIEKLL EYGNMLVAEQ
401 ENVKRVQLAD KYLSEAALGE ANEDSINRGT FYGKAAQQVG VPVPEGCTDE
451 NADNFDPTAR SDDGTCTYKF
```

Spot No.: F9

Protein name: S-adenosylmethionine synthetase 2

Peptide sequences:

**K.VLVNIEQQSPDIAQGVHGHFTK.R;K.TIFHLNPSGR.F;R.FVIG  
GPHGDAGLTGR.K;K.ENFDFRPGMITINLDLK.R;K.TAAYGHF  
GR.D**

Accession No.: Gohir.D07G135100.1.p

Mascot score: 329

Sequence coverage %:18

Calculated Mr: 43500

Calculated pI: 5.49

PFF Searched Score:

Ions score is  $-10 \cdot \log(P)$ , where P is the probability that the observed match is a random event. Individual ions scores  $> 35$  indicate identity or extensive homology ( $p < 0.05$ ). Protein scores are derived from ions scores as a non-probabilistic basis for ranking protein hits.

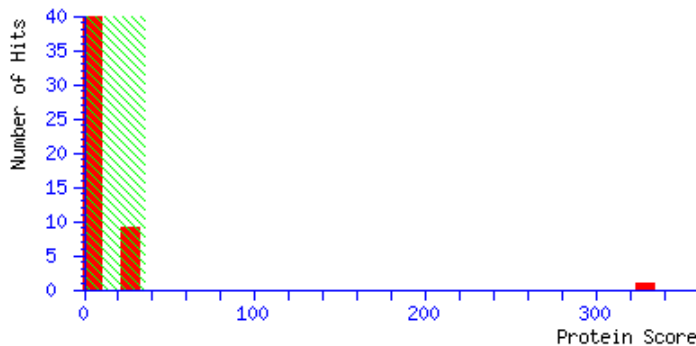

Matched peptide sequences: shown in **Bold Red**:

```
1 METFLFTSES VNEGHPDKLC DQVSDAVLDA CLAQDPDSKV ACETCTKTNM
51 VMVFGEITTK ANVDYEKIVR DTCRSIGFVS DDVGLDADNC KVLVNIEQQS
101 PDIAQGVHGH FTKRPEEIGA GDQGHMFGYA TDETPEFMPL SHVLATKLGA
151 RLTDVRKNGT CPWLRPDGKT QVTVEYYNDN GAMVPVRVHT VLISTQHDET
201 VTNDEIAADL KEHVIKPVIP EKYLDEKTIF HLNPSGRFVI GGPHGDAGLT
251 GRKIIIDTYG GWGAHGGGAF SGKDPTKVDR SGAYIVRQAA KSIVANGLAR
301 RCIVQVSYAI GVPEPLSVFV DSYGTGKIPD KEILQIVKEN FDFRPGMITI
351 NLDLKRGGNS RFLKTAAYGH FGRDDPDFTW EAVKPLKWDK PQS
```

Spot No.: **F14**

Protein name: **Actin 7**

Peptide sequences:

**R.AVFPSIVGR.P;K.IWHHTFYNELR.V;K.NYELPDGQVITIGAE  
R.F;K.GEYDESGPSIVHR.K**

Accession No.: **Gohir.A03G105800.1.p**

Mascot score: **175**

Sequence coverage %:**12**

Calculated Mr: **41913**

Calculated pI: **5.31**

PFF Searched Score:

Ions score is  $-10 \cdot \log(P)$ , where P is the probability that the observed match is a random event. Individual ions scores  $> 34$  indicate identity or extensive homology ( $p < 0.05$ ). Protein scores are derived from ions scores as a non-probabilistic basis for ranking protein hits.

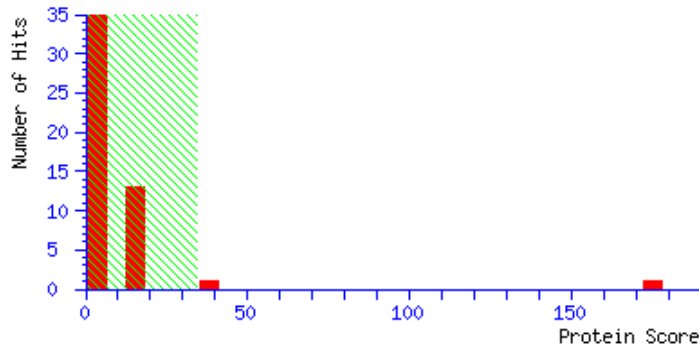

Matched peptide sequences: shown in **Bold Red**:

```
1 MADAEDIQPL VCDNGTGMVK AGFAGDDAPR AVFPSIVGRP RHTGVMVGMG
51 QKDAYVGDEA QSKRGILTLK YPIEHGIVSN WDDMEKIIWHH TFYNELRVAP
101 EEHPVLLTEA PLNPKANREK MTQIMFETFN VPAMYVAIQV VLSLYASGRT
151 TGIVLDSGDG VSHTVPIYEG YALPHAILRL DLAGRDLTDS LMKILTERGY
201 MFTTTAEREI VRDMKEKLAY VALDYEQELE TAKSSSSVEK NYELPDGQVI
251 TIGAERFRCP EVLFQPSLIG MEAAGIHETT YNSIMKCDVD IRKDLYGNIV
301 LSGGSTMFPG IADRMSKEIT ALAPSSMKIK VVAPPERKYS VWIGGSILAS
351 LSTFQQMWIS KGEYDESGPS IVHRKCF
```

Spot No.: **F15**

Protein name: **RAB GTPase homolog E1B**

Peptide sequences:

**K.KYDEIDAAPEER.A;R.GITINTATVEYETENR.H;K.IYELMDA  
VDSYIPVPQR.Q;K.TLDDAMAGDNVGLLLR.G**

Accession No.: **Gohir.A03G057300.1.p**

Mascot score: **372**

Sequence coverage %:**12**

Calculated Mr: **52793**

Calculated pI: **6.21**

PFF Searched Score:

Ions score is  $-10 \cdot \log(P)$ , where P is the probability that the observed match is a random event. Individual ions scores  $> 34$  indicate identity or extensive homology ( $p < 0.05$ ). Protein scores are derived from ions scores as a non-probabilistic basis for ranking protein hits.

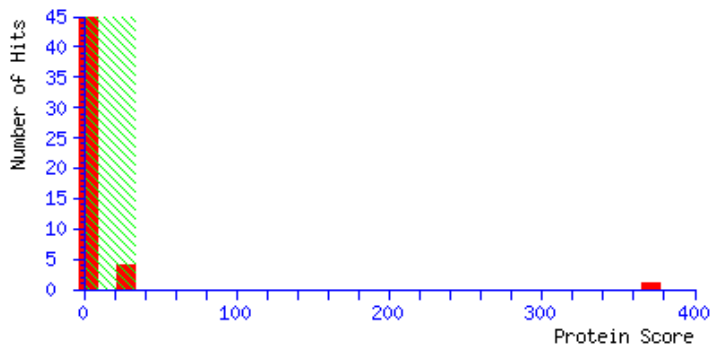

Matched peptide sequences: shown in **Bold Red**:

```
1 MAISSTAAAT AASSKLRYPH ASPFPHTSST TTSAFFSSIP SKLTPHTLSS
51 SFLPPFLTTV ATTYVFPRRR DSFTVKAARG KFERKKPHVN IGTIGHVDHG
101 KTTLTAALTM ALASMGNSAP KKYDEIDAAP EERARGITIN TATVEYETEN
151 RHYAHVDCPG HADYVKNMIT GAAQMDGAIL VVSGADGPMP QTKEHILLAK
201 QVGVPNVVVF LNKQDQVDDE ELLQLVELEV RELSSYEFP GDDVPIISGS
251 ALLALEALMA KPSIPRGENQ WVDKIYELMD AVDSYIPVPQ RQTDLPFLLA
301 VEDVFSITGR GTVATGRIER GTVKVGETVD IVGLKDTRNV TVTGVMFQK
351 TLDDAMAGDN VGLLLRGVQK ADIQRGMVLA KPGTITPHTK FSAIVYVLKK
401 EEGGRHSPPF AGYRPQFYMR TTDVTGRVAS IMNDKDEESK MVMPGDRVKM
451 VVELIMPVAC EQGMRFAIRE GGKTVGAGVI QSIIE
```



Spot No.: **F16**

Protein name: **Glutamine synthetase**

Peptide sequences:

**R.GGNNILVICDSYTPAGEPIPTNKR.H;R.HKEHISAYGEGNER.  
R;K.EHISAYGEGNER.R;K.HETASINTFSWGVANR.G;R.RPASN  
MDPYVVTALLAETTLLYEPTLEAEALAAQK.I**

Accession No.: **Gohir.D02G032300.1**

Mascot score: **431**

Sequence coverage %:**20**

Calculated Mr: **47737**

Calculated pI: **7.08**

PFF Searched Score:

Ions score is  $-10 \cdot \log(P)$ , where P is the probability that the observed match is a random event. Individual ions scores  $> 34$  indicate identity or extensive homology ( $p < 0.05$ ). Protein scores are derived from ions scores as a non-probabilistic basis for ranking protein hits.

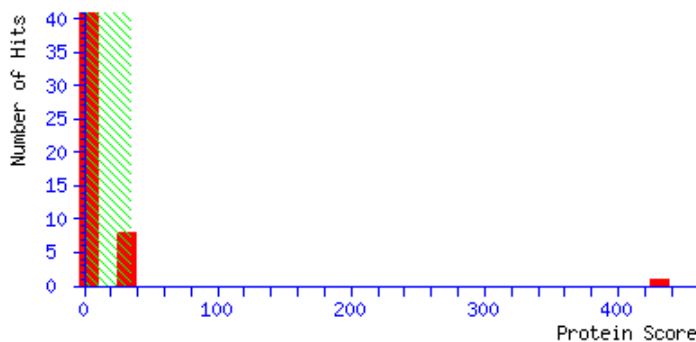

Matched peptide sequences: shown in **Bold Red**:

```
1 MAQLLAPSTQ WQMTLPKTST YGSPiATKMW SSLVLKQNKK GAAKSSGKFK
51 VVALSENSTV NRLENLLNMD VTPYTDKIIA EYIWIGGSL DMRSKSRITIS
101 KPVKHPSELP KWNyDGSSTG QAPGEDSEVI LYPQAIKDP FRGGNNILVI
151 CDSYTPAGEP IPTNKRHRAA EIFSNKKVVD EVPWFGIEQE YTL LQONVKW
201 PLGWpVGGYP GPQGPYYCAA GADKSFGRDI SDAHYKACLY AGINISGTNG
251 EVMPGQWEYQ VGPSVGIEAG DHIWCSRYIL ERITEQAGVV LSLDPKPIEG
301 DWNGAGCHTN YSTKSMREDG GFEVIKKAIL NLSLRHKEHI SAYGEGNERR
351 LTGKHETASI NTFSWGVANR GCSIRVGRDT EKNGKGYLED RRPASNMDPY
401 VVTALLAETT LLYEPTLEAE ALAAQKIALN V
```



Spot No.: **F19**

Protein name: **Rubisco activase**

Peptide sequences:

**K.GLAYDISDDQQDITR.G;R.VPIIVTGNDFSTLYAPLIR.D;K.FY  
WAPTR.E;R.IGVCTGIFR.T;K.LVDTFPGQSIDFFGALR.A;K.YLS  
EAALGNANDDAIKR.G**

Accession No.: **Gohir.A10G221700.1.p**

Mascot score: **625**

Sequence coverage %: **19**

Calculated Mr: **48189**

Calculated pI: **5.40**

PFF Searched Score:

Ions score is  $-10 \cdot \log(P)$ , where P is the probability that the observed match is a random event. Individual ions scores  $> 34$  indicate identity or extensive homology ( $p < 0.05$ ). Protein scores are derived from ions scores as a non-probabilistic basis for ranking protein hits.

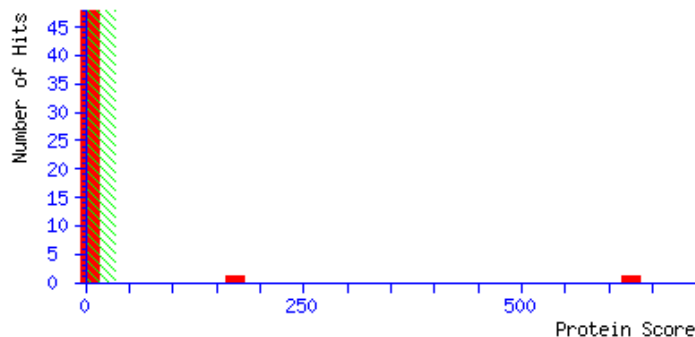

Matched peptide sequences: shown in **Bold Red**:

```
1  MAAAVSTIGA  VNRAPLSLNG  SGAGASAPSS  AFMGNSLKKV  SARFNNNGKA
51  PVGSFMIVAA  KEIDEDTQTD  QDRWKGLAYD  ISDDQQDITR  GKGMVDSLQ
101 APMNDGTHYA  VMSSYEYISQ  GLRTYDLNND  MDGFYIAPAF  MDKLVVHITK
151 NYMTLPNIKV  PLILGIWGGK  GQGKSFQCEL  VFAKMGINPI  MMSAGELESG
201 NAGEPAKLIR  QRYREAADII  KKGKMCCLFI  NDLDAGAGRM  GGTTQYTVNN
251 QMVNATLMNI  ADNPTNVQLP  GMYNKEENPR  VPIIVTGNDF  STLYAPLIRD
301 GRMEKFYWAP  TREDRIGVCT  GIFRTDNVPV  DDIVKLVDTF  PGQSIDFFGA
351 LRARVYDDEV  RKWIGEVEGVN  SVGKKLVNSR  EGPPSFEQPT  MTIEKLLLEYG
401 NMLVAEQENV  KRVQLADKYL  SEAALGNAND  DAIKRGAF
```

Spot No.: **F21**

Protein name: **Rubisco activase**

Peptide sequences:

**K.GLAYDISDDQQDITR.G;R.VPIIVTGNDFSTLYAPLIR.D;K.FY  
WAPTR.E;R.IGVCTGIFR.T;K.LVDTFPGQSIDFFGALR.A;K.YLS  
EAALGNANDDAIKR.G**

Accession No.: **Gohir.A10G221700.1.p**

Mascot score: **669**

Sequence coverage %:**19**

Calculated Mr: **48189**

Calculated pI: **5.40**

**PFF Searched Score:**

Ions score is  $-10 \cdot \log(P)$ , where P is the probability that the observed match is a random event. Individual ions scores  $> 34$  indicate identity or extensive homology ( $p < 0.05$ ). Protein scores are derived from ions scores as a non-probabilistic basis for ranking protein hits.

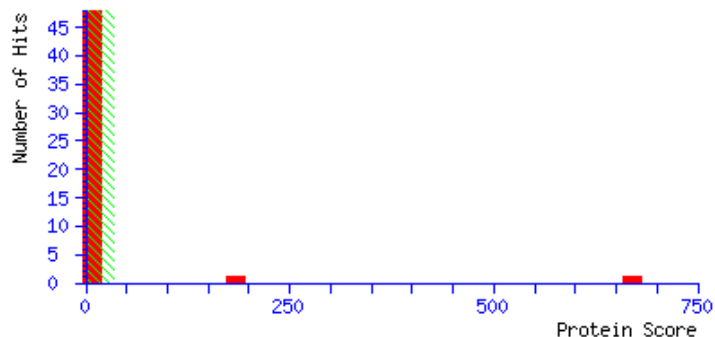

**Matched peptide sequences: shown in Bold Red:**

```
1  MAAAVSTIGA  VNRAPLSLNG  SGAGASAPSS  AFMGNSLKKV  SARFNNNGKA
51  PVGSFMIVAA  KEIDEDTQTD  QDRWKGLAYD  ISDDQQDITR  GKGMVDSLQ
101 APMNDGTHYA  VMSSYEYISQ  GLRTYDLNND  MDGFYIAPAF  MDKLVVHITK
151 NYMTLPNIKV  PLILGIWGGK  GQGKSFQCEL  VFAKMGINPI  MMSAGELESG
201 NAGEPAKLIR  QRYREAADII  KKGKMCCLFI  NDLDAGAGRM  GGTQYTVNN
251 QMVNATLMNI  ADNPTNVQLP  GMYNKEENPR  VPIIVTGNDF  STLYAPLIRD
301 GRMEKFYWAP  TREDRIGVCT  GIFRTDNVPV  DDIVKLVDTF  PGQSIDFFGA
351 LRARVYDDEV  RKWIGEVGVN  SVGKKLVNSR  EGPPSFEQPT  MTIEKLLLEYG
401 NMLVAEQENV  KRVQLADKYL  SEAALGNAND  DAIKRGAF
```

Spot No.: **F23**

Protein name: **Phosphoribulokinase**

Peptide sequences:

**K.ILVIEGLHPMFDER.V;R.VRDLLDFSIYLDISNEVK.F;K.HFSP  
VYLFDEGSTISWIPCGR.K;R.LDELIYVESHLSNISTR.F;K.IRDL  
YEQITSSK.T**

Accession No.: **Gohir.A12G204600.1.p**

Mascot score: **449**

Sequence coverage %:**20**

Calculated Mr: **45621**

Calculated pI: **6.14**

PFF Searched Score:

Ions score is  $-10 \cdot \log(P)$ , where P is the probability that the observed match is a random event. Individual ions scores  $> 34$  indicate identity or extensive homology ( $p < 0.05$ ). Protein scores are derived from ions scores as a non-probabilistic basis for ranking protein hits.

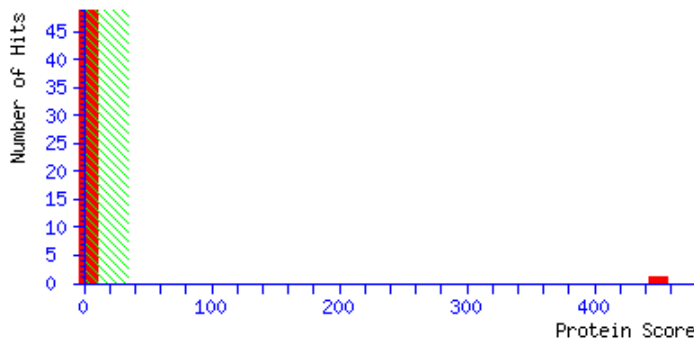

Matched peptide sequences: shown in **Bold Red**:

```
1 MAVCSAYTTQ SLHSTCSIST PAKTHLGFHQ KQVVFYRRSS KRGGSGSSSG
51 PCVITCSAGD SQTVVIGLAA DSGCGKSTFM RRLTSVFGGA AEPPKGGNPD
101 SNTLISDMTT VICLDDYHSL DRTGRKEKGV TALDPRANDF DLMYEQVKAI
151 KSGVAVDKPI YNHVTGLLDP PELIKPPKIL VIEGLHPMFD ERVRDLLDFS
201 IYLDISNEVK FAWKIQRDMA ERGHSLESIR ASIEARKPDF DAYIDPQKKY
251 ADAVIEVLPT QLIPDDNEGK VLRVRLIMKE GVKHFSPVYL FDEGSTISWI
301 PCGRKLTCSY PGIKFHYGPD TYFGNEVSIL EMDGQFDRLD ELIYVESHLS
351 NISTRFYGEV TQQLKHADF PGSNNGTGLF QTIVGLKIRD LYEQITSSKT
401 AAPLEATKA
```

Spot No.: **F24**

Protein name: **Phosphoribulokinase**

Peptide sequences:

**K.ILVIEGLHPMFDER.V;R.VRDLLDFSIYLDISNEVK.F;R.DLLD  
FSIYLDISNEVK.F;R.KPDFDAFIDPQK.Q;K.EGVEHFSPVYLFDE  
GSTISWIPCGR.K;K.FSYGPDYFGHEVSVLEMDGQFDR.L**

Accession No.: **Gohir.D03G177400.1.p**

Mascot score: **436**

Sequence coverage %:**22**

Calculated Mr: **45591**

Calculated pI: **5.96**

PFF Searched Score:

Ions score is  $-10 \cdot \log(P)$ , where P is the probability that the observed match is a random event. Individual ions scores  $> 33$  indicate identity or extensive homology ( $p < 0.05$ ). Protein scores are derived from ions scores as a non-probabilistic basis for ranking protein hits.

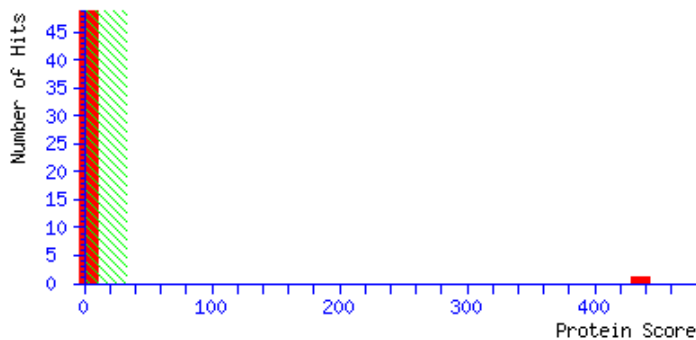

Matched peptide sequences: shown in **Bold Red**:

```
1 MAVCPVYTTQ SLNSTCSIST PSKTHFSSHH NHLVFYRTSK RTSKRGSSS
51 CVITCSAGDS QTVVIGLAAD SGCGKSTFMR RLTSVFGGAA EPPKGGNPDS
101 NTLISDMTTV ICLDDYHSLD RTGRKEKGV ALDPRANDFD LMYEQVKALK
151 SGIAVDKPIY NHVTGLDPP ELIKPPKILV IEGLHPMFDE RVRDLLDFSI
201 YLDISNEVKF AWKIQRDME RGHSLESIKA SIEARKPDFD AFIDPQKQYA
251 DAVIEVLPTQ LIPDDNEGKV LRVRLIMKEG VEHFSPVYLF DEGSTISWIP
301 CGRKLTCYP GIKFSYGPD YFGHEVSVLE MDGQFDRLDE LIYVESHLN
351 LSTKFYGEVT QQMLKHADFP GSNNGTGLFQ TIVGLKIRDL YEQITASKTA
401 APLQATKA
```

Spot No.: **G1**

Protein name: **Phosphoribulokinase**

Peptide sequences:

**K.ILVIEGLHPMFDER.V;R.VRDLLDFSIYLDISNEVK.F;R.KPDF  
DAFIDPQK.Q;K.FSYGPDYFGHEVSVLEMDGQFDR.L**

Accession No.: **Gohir.D03G177400.1.p**

Mascot score: **234**

Sequence coverage %:**16**

Calculated Mr: **45591**

Calculated pI: **5.96**

**PFF Searched Score:**

Ions score is  $-10 \cdot \log(P)$ , where P is the probability that the observed match is a random event. Individual ions scores  $> 34$  indicate identity or extensive homology ( $p < 0.05$ ). Protein scores are derived from ions scores as a non-probabilistic basis for ranking protein hits.

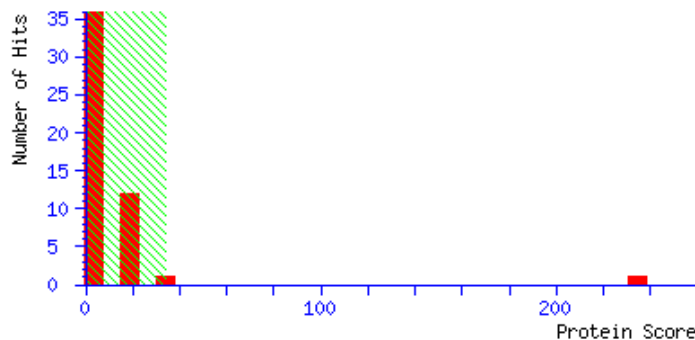

**Matched peptide sequences: shown in Bold Red:**

```
1 MAVCPVYTTQ SLNSTCSIST PSKTHFSSH NHLVFYRISK RISKRGSSS
51 CVITCSAGDS QTVVIGLAAD SGCGKSTFMR RLTSVFGGAA EPPKGGNPDS
101 NTLISDMTTV ICLDDYHSLD RTGRKEKGV ALDPRANDFD LMYEQVKALK
151 SGIADVDPYI NHVTGLLDPP ELIKPPKILV IEGLHPMFDE RVRDLLDFSI
201 YLDISNEVKF AWKIQRDME RGHSLESIKA SIEARKKPDFD AFIDPQKQYA
251 DAVIEVLPTQ LIPDDNEGKV LRVRLIMKEG VEHFSPVYLF DEGSTISWIP
301 CGRKLTCSTP GIKFSYGPDT YFGHEVSVLE MDGQFDRLDE LIYVESHLSN
351 LSTKFYGEVT QQMLKHADFP GSNNGTGLFQ TIVGLKIRDL YEQITASKTA
401 APLQATKA
```

Spot No.: **G3**

Protein name: **Malate dehydrogenase 1**

Peptide sequences:

**R.VLVTGAAGQIGYALVPMIAR.G;K.MELVDAAFPLLK.G;K.G  
VVATTDAVEACTGVNVAVMVGGFPR.K;R.ELVKDDAWLNGE  
FITTVQQR.G;K.LSSALSAASAACDHIR.D**

Accession No.: **Gohir.D02G045500.1.p**

Mascot score: **288**

Sequence coverage %:**28**

Calculated Mr: **35830**

Calculated pI: **6.10**

PFF Searched Score:

Ions score is  $-10 \cdot \log(P)$ , where P is the probability that the observed match is a random event. Individual ions scores  $> 34$  indicate identity or extensive homology ( $p < 0.05$ ). Protein scores are derived from ions scores as a non-probabilistic basis for ranking protein hits.

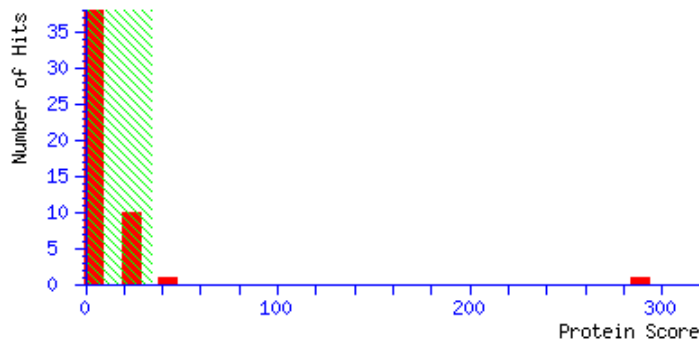

Matched peptide sequences: shown in **Bold Red**:

```
1 MAKEPVRVLV TGAAGQIGYA LVPMIARGVM LGADQPVILH MLDIPPAEEA
51 LNGVKMELVD AAFPLLKGVV ATTDAVEACT GNVVAVMVGG FPRKEGMERK
101 DVMSKNVSIY KSQASALEQH AAPNCKVLVV ANPANTNALI LKEFAPSIPA
151 KNITCLTRLD HNRALGQISE KLNQVSDVK NVIIWGNHSS TQYPDVNHAT
201 VMTPSGEKPV RELVKDDAWL NGEFITTVQQ RGAAIKARK LSSALSAASA
251 ACDHIRDWVL GPEGTWVSM GVYSDGSYNA PAGVIYSFPV TCKNGEWTIV
301 QGLAIDEFSR KKLDLTGVEL TEEKELAYSC LS
```

Spot No.: **G5**

Protein name: **Coproporphyrinogen III oxidase 1**

Peptide sequences:

**K.AGVNISVVYGVMPPEAYR.A;K.NPFAPTLHFNYR.Y;K.FDPSF  
YPR.F;R.YVEFNLVYDR.G;R.IESILVSLPLSAR.W**

Accession No.: **Gohir.A08G050600.1.p**

Mascot score: **411**

Sequence coverage %:**20**

Calculated Mr: **34176**

Calculated pI: **5.63**

PFF Searched Score:

Ions score is  $-10 \cdot \log(P)$ , where P is the probability that the observed match is a random event. Individual ions scores  $> 35$  indicate identity or extensive homology ( $p < 0.05$ ). Protein scores are derived from ions scores as a non-probabilistic basis for ranking protein hits.

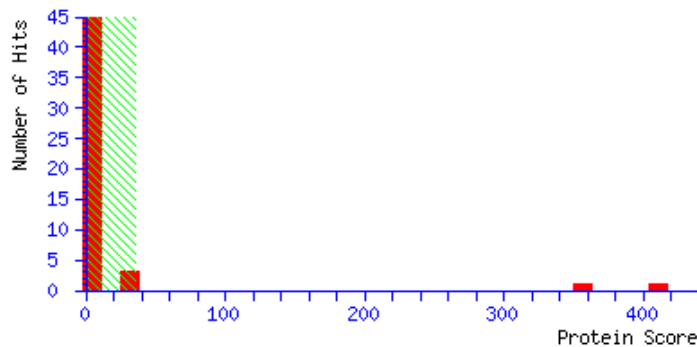

Matched peptide sequences: shown in **Bold Red**:

```
1 MILEAQESVC AALEAVDGAG KFKEDAWTRP GGGGGISRVL QDGAVFEKAG
51 VNISVVYGVMPPEAYRAAKA AADDQKPGPV PFFAAGISSV LHPKNPFAPT
101 LHFNYRYFET DAPKDTPGAP RQWWFGGGTD LTPAYIFEED VKHFHSIQKK
151 ACDKFDPSFY PRFKKWCCDY FYIKHRGERR GLGGIFFDDL NDYDQEMLLS
201 FATECANSVV PAYIPIIEKR KDTPFNESQK AWQQLRRGRY VEFNLVYDRG
251 TTFGLKTGGR IESILVSLPL SARWEYDHKP EEGSEEWKLL DACINPKEWI
301
```



Spot No.: **G6**

Protein name: **Fructose-bisphosphate aldolase**

Peptide sequences:

**R.LASIGLENTEANR.Q;K.GLVPLPGSNNESWCQGLDGLSSR.T;  
R.TAAYYQQGAR.F;R.YAAISQDSGLVPIVEPEILLDGDHGIDR.  
T**

Accession No.: **Gohir.A13G030400.1.p**

Mascot score: **327**

Sequence coverage %: **18**

Calculated Mr: **43216**

Calculated pI: **8.44**

PFF Searched Score:

Protein score is  $-10 \cdot \log(P)$ , where P is the probability that the observed match is a random event. Protein scores greater than 62 are significant ( $p < 0.05$ ). Protein scores are derived from ions scores as a non-probabilistic basis for ranking protein hits.

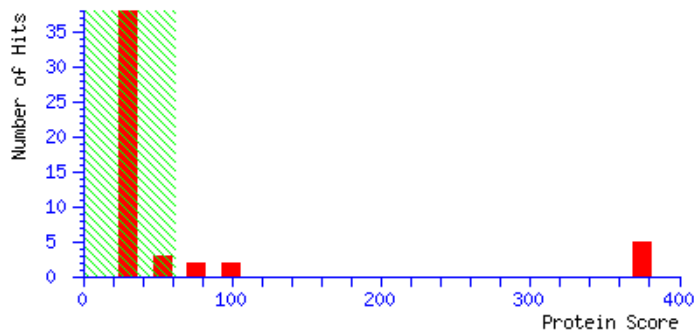

Matched peptide sequences: shown in **Bold Red**:

```
1 MASASATLLK SSPIIDKSEW IKGQNLRHPS VCFVRSHTS AAFTVRASSY
51 ADELVKTAKT VASPGRGILA MDESNAATCGK RLASIGLENT EANRQAYRTL
101 LVSAPGLGNY ISGAILFEET LYQSTIDGKK MVDVLVEQNI VPGIKVDKGL
151 VPLPGSNNES WCQGLDGLSS RTAAYYQQGA RFAKWRTVVS IPNGPSALAV
201 KEAAWGLARY AAISQDSGLV PIVEPEILLD GDHGIDRTFE VAQKVWAEVF
251 FYLAENNVMF EGILLKPSMV TPGAECKDKA TPQQVADYTL KLLHRRIPPA
301 VPGIMFLSGG QSEVEATLNL NAMNQSPNPW HVSFSYARAL QNTCLKTWGG
351 RPENVKAAQD TLLVRAKANS LAQLGKYTGE GESEEAKKGM FVKGYVY
```

Spot No.: **G9**

Protein name: **30S ribosomal protein, putative**

Peptide sequences: **R.AEEDAETVYGSIDLVSILQR.K**

Accession No.: **Gohir.1Z057400.1.p**

Mascot score: **202**

Sequence coverage %:**7**

Calculated Mr: **32072**

Calculated pI: **5.53**

**PFF Searched Score:**

Ions score is  $-10 \cdot \log(P)$ , where P is the probability that the observed match is a random event. Individual ions scores  $> 34$  indicate identity or extensive homology ( $p < 0.05$ ). Protein scores are derived from ions scores as a non-probabilistic basis for ranking protein hits.

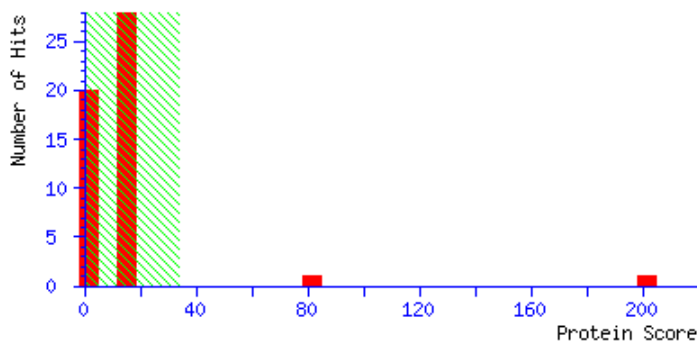

**Matched peptide sequences: shown in Bold Red:**

```
1 MATTLLASSQ TSFHHPLSVS DSSFSSPSSS SSSVSMFTLT KPRIPLPSY
51 KSSFFNPIGN YFKCVEMEPR KIRNSSLTVR MSWDGPLASV KLIIQGKSLE
101 LTDTVKQHVE EKVTLFTKKH GVVRAEEDAE TVYGSIDLVS SILQRKLRLKI
151 KEKESDRGRH MKGFSRSKVR EPVAVVVDDD AEAVPEQVVA DDDVAAVPEQ
201 EDDSFIDEIV RTKYFEMPPL TVSEAVEQLE NVDHDFYGFR NEETGEINII
251 YKRKAGGYGL IIPKGNKAE KLEPLVESA KEHSYVE
```

Spot No.: **G11**

Protein name: **Ferredoxin-NADP(+)-oxidoreductase 2**

Peptide sequences:

**K.ITGDDAPGETWHMVFSTEGEVPYR.E;K.DPNATIIMLATGTG  
IAPFR.S**

Accession No.: **Gohir.A05G186100.1.p**

Mascot score: **210**

Sequence coverage %:**11**

Calculated Mr: **40678**

Calculated pI: **8.36**

PFF Searched Score:

Ions score is  $-10 \cdot \log(P)$ , where P is the probability that the observed match is a random event. Individual ions scores  $> 34$  indicate identity or extensive homology ( $p < 0.05$ ). Protein scores are derived from ions scores as a non-probabilistic basis for ranking protein hits.

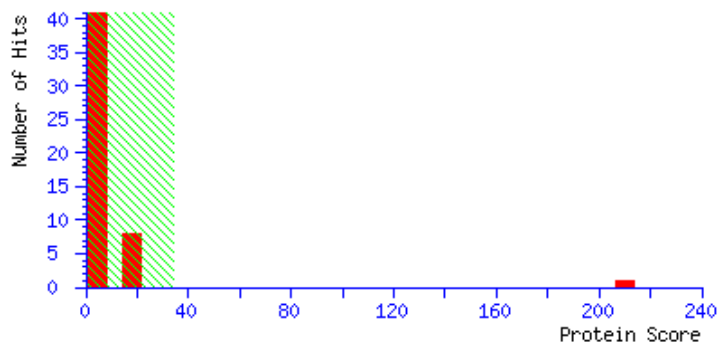

Matched peptide sequences: shown in **Bold Red**:

```
1 MAMTVNAAVS LPSSKSSTLS FKNSVIVPER INFNKSVLYP KNVSLGGNV
51 SIRAQVTTEA PAKAPKISKK DDEGIVVNKF KPKEPYIGKC LLNTKITGDD
101 APGETWHMVF STEGEVPYRE GQSIGVIPDG IDKNGKPHKL RLYSIASSAL
151 GDFGNSQTVS LCVKRLVYTN EQGEIVKGVC SNFLCDLKPG AEVKITGPVG
201 KEMLLPKDPN ATIIMLATGT GIAPFRSFLW KMFPEKHDDY KFNGLAWLFL
251 GVPTSSSLLY PEEFEKMKEK APNNLRVDYA ISREQTNEQG EKMYIQTRMA
301 QYAEELWELL KKDNTYVYMC GLKGMEKGID DIMTSLAAKD GIDWIEYKRQ
351 MKKGEQWNVE VY
```

Spot No.: **G15**

Protein name: **Photosystem II subunit O-2**

Peptide sequences:

**K.RLTYDEIQSK.T;K.FEEKDGDYAAVTVQLPGGGER.V;K.DGIDYAAVTVQLPGGGER.V;R.VPFLFTIK.Q;R.GGSTGYDNAVALPAGGR.G;K.SKPETGEVIGVFESLQPSDTDLGAK.T**

Accession No.: **Gohir.D11G194600.1.p**

Mascot score: **623**

Sequence coverage %:**24**

Calculated Mr: **35293**

Calculated pI: **5.37**

PFF Searched Score:

Ions score is  $-10 \cdot \log(P)$ , where P is the probability that the observed match is a random event. Individual ions scores  $> 34$  indicate identity or extensive homology ( $p < 0.05$ ). Protein scores are derived from ions scores as a non-probabilistic basis for ranking protein hits.

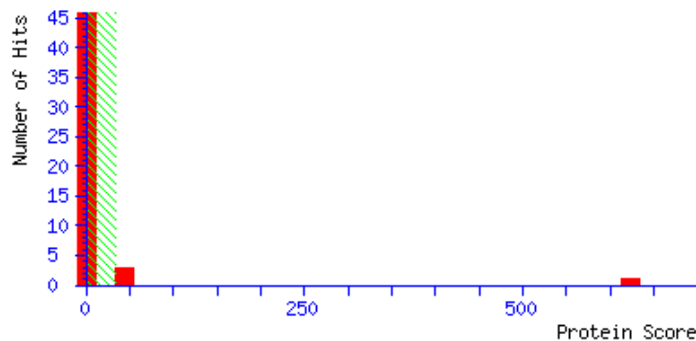

Matched peptide sequences: shown in **Bold Red**:

```
1 MSVSLQAAAT LMQPIKVAAP SRTNVLLRSS QSVSKAFGLE PVGARLTCSL
51 QTDLKDLAQT CVDATKLAGF ALATSALVVS GASAEGVPKR LTYDEIQSKT
101 YMEVKGTGTA NQCPTIDGGV DSFAFKPGKY YAKKFCLEPT SFTVKAEGVN
151 KNAPPEFQNT KLMTRLTYTL DEIEGPFVVS TDGTVKFEEK DGIDYAAVTV
201 QLPGGERVVPF LFTIKQLVAS GKPDSFGGDF LVPSYRGSSF LDPKGRGGST
251 GYDNAVALPA GGRGDEEELA KENNKSAASS SGKITLSVTK SKPETGEVIG
301 VFESLQPSDT DLGAKTPKDV KITGVWYAQL DS
```

Spot No.: **G16**

Protein name: **2-phosphoglycolate phosphatase 1**

Peptide sequences:

**K.LIDGVPETLDMLR.S;K.DVGAVVVGFD.R.Y;K.VQYGTLCIR.E  
;R.ENPGCLFIATNR.D**

Accession No.: **Gohir.A02G108400.1.p**

Mascot score: **142**

Sequence coverage %:**12**

Calculated Mr: **41067**

Calculated pI: **8.45**

PFF Searched Score:

Ions score is  $-10 \cdot \log(P)$ , where P is the probability that the observed match is a random event. Individual ions scores  $> 35$  indicate identity or extensive homology ( $p < 0.05$ ). Protein scores are derived from ions scores as a non-probabilistic basis for ranking protein hits.

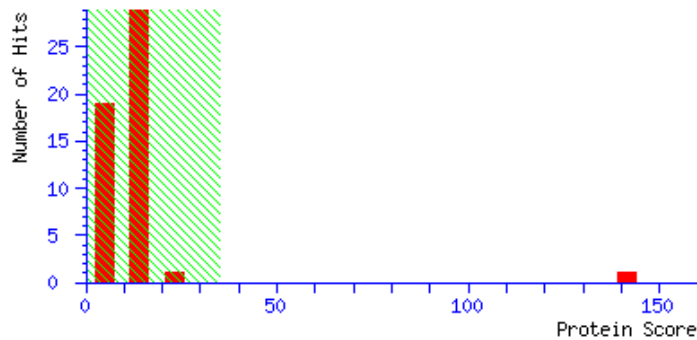

Matched peptide sequences: shown in **Bold Red**:

```
1 MATKAAVSVA ASVTAASSSS SKFVINTPHR FLCLKRLSSF SSFSASALAI
51 KCTSISNCSP NKSARSMEGF TTRTKASAQP LENADELIAS VETFIFDCDG
101 VIWKGDKLID GVPETLDMLR SKGKRLVFVT NNSTKSRKQY GKKFETLGLN
151 VNEEEIFASS FAAAAYLKSI NFPKDKKVYV IGEDGILKEL ELAGFQYLGG
201 PEDGGKKIEL KPGFLMEHDK DVGAVVVGFD RYFNYYKVQY GTLCIRENPG
251 CLFIATNRDA VTHLTDAQEW AGGGSVMGAI CGSTQREPLV VGKPSTFMMD
301 YLANKFGILK SQICMVGDRD DTDILFGQNG GCKTLLVLSG VTNLSMLQSP
351 SNSIQPDFYT NKISDFLSIK TATV
```

Spot No.: **G17**

Protein name: **Oxygen-evolving enhancer protein 1**

Peptide sequences:

**K.FEEKDGIDYAAVTVQLPGGGER.V;K.DGIDYAAVTVQLPGGGER.V;R.GGSTGYDNAVALPAGGR.G**

Accession No.: **Gohir.A11G188100.1.p**

Mascot score: **246**

Sequence coverage %:**11**

Calculated Mr: **35233**

Calculated pI: **5.84**

PFF Searched Score:

Ions score is  $-10 \cdot \log(P)$ , where P is the probability that the observed match is a random event. Individual ions scores  $> 34$  indicate identity or extensive homology ( $p < 0.05$ ). Protein scores are derived from ions scores as a non-probabilistic basis for ranking protein hits.

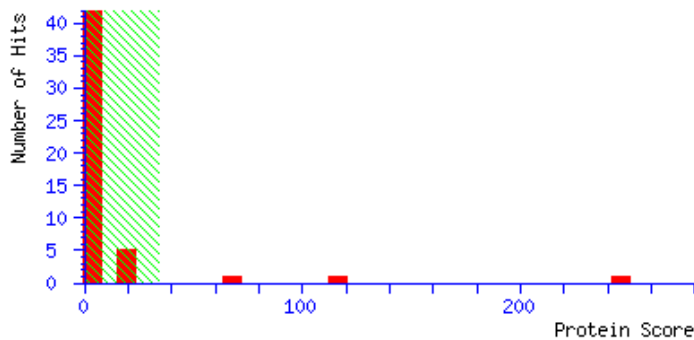

Matched peptide sequences: shown in **Bold Red**:

```
1 MAVSLQAAAT LMQPIKVAAP SRTNVPLRSS QSVSKAFGLE PVGARLTCSL
51 QTDLKDALK CVDATKLAGF ALATSALVVS GASAEGVSKR LTYAEIQSKT
101 YMEVKGTGTA NQCPTIDGGV DSFAFKPGKY YAKKFCLEPT SFTVKAEGVN
151 KNAPPEFQNT KLMTRLTYTL DEIEGPFEVS TDGTLKFEEK DGIDYAAVTV
201 QLPGGERVPF LFTIKQLVAS GKPDSFGGDF LVPSYRGSSF LDPKGRGGST
251 GYDNAVALPA GGRGDEEELA KENNKSAASS SGKITLSVTK SKPETGEVIG
301 VFESLQPSDT DLGAKTPKDV KITGVWYAQL DS
```

Spot No.: **G18**

Protein name: **Oxygen-evolving enhancer protein 1**

Peptide sequences:

**K.FEEKDGIDYAAVTVQLPGGER.V;K.DGIDYAAVTVQLPGGER.V;R.VPFLFTIK.Q;R.GGSTGYDNAVALPAGGR.G;K.SKPETG  
EVIGVFESLQPSDTDLGAK.T**

Accession No.: **Gohir.A11G188100.1.p**

Mascot score: **343**

Sequence coverage %:**21**

Calculated Mr: **35233**

Calculated pI: **5.84**

PFF Searched Score:

Ions score is  $-10 \cdot \log(P)$ , where P is the probability that the observed match is a random event. Individual ions scores  $> 34$  indicate identity or extensive homology ( $p < 0.05$ ). Protein scores are derived from ions scores as a non-probabilistic basis for ranking protein hits.

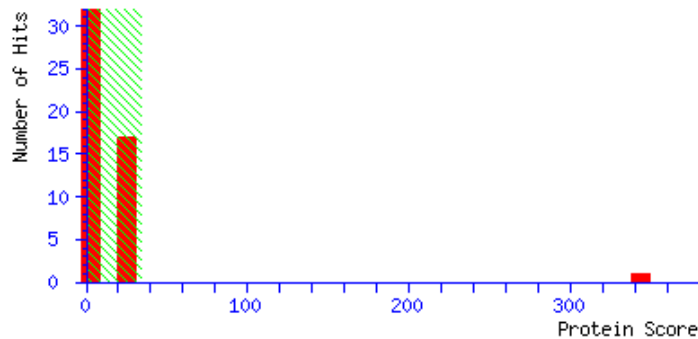

Matched peptide sequences: shown in **Bold Red**:

```
1 MAVSLQAAAT LMQPIKVAAP SRTNVPLRSS QSVSKAFGLE PVGARLTCSL
51 QTDLKDLALK CVDATKLAGF ALATSALVVS GASAEGVSKR LTYAEIQSKT
101 YMEVKGTGTA NQCPTIDGGV DSFAFKPGKY YAKKFCLEPT SFTVKAEGVN
151 KNAPPEFQNT KLMTRLTYTL DEIEGPFVVS TDGTLKFEEK DGIDYAAVTV
201 QLPGGERVPP LFTIKQLVAS GKPDSFGGDF LVPSYRGSSF LDPKGRGGST
251 GYDNAVALPA GGRGDEEELA KENNKSAASS SGKITLSVTK SKPETGEVIG
301 VFESLQPSDT DLGAKTPKDV KITGVWYAQL DS
```



**Spot No.: G19**

**Protein name: Glycine-rich RNA-binding protein 3**

**Peptide sequences:**

**K.LFVGGISYQTDDQGLR.E;R.GFGFVITYTSSKDASSALQALDG  
QTLHGR.Q**

**Accession No.: Gohir.D07G072800.1**

**Mascot score: 90**

**Sequence coverage %:16**

**Calculated Mr: 27996**

**Calculated pI: 4.77**

**PFF Searched Score:**

Ions score is  $-10 \cdot \log(P)$ , where P is the probability that the observed match is a random event. Individual ions scores  $> 35$  indicate identity or extensive homology ( $p < 0.05$ ). Protein scores are derived from ions scores as a non-probabilistic basis for ranking protein hits.

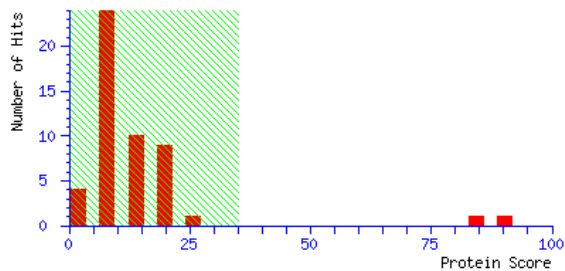

**Matched peptide sequences: shown in Bold Red:**

```
1 MAFLSKIGNM LRQTSTTQIN AQLSASSPSL FQVFRMSNA PSSKLFVGGI
51 SYQTDDQGLR EAFSKYGEVI EARIIVDRET GRSRGFGFVT YTSSKDASSA
101 LQALDGQTLH GRQVRVNYAT ERAPRNFGGG GYGGGGYGGG GYGGGGYGGG
151 GYGGGGDYGRN AAPTSGNYGG NVGYGGSGNY GGQGSHTGGFG QSDATNYESG
201 SFSVAGGGGG IDVGTGGSA GFGSPNMGID SVDKFSSTED GFKEEEAFDS
251 NEPMNENFRD EDDENGSDFA KRA
```

Spot No.: **G21**

Protein name: **Ribose 5-phosphate isomerase, type A protein**

Peptide sequences:

**R.TQEQAASLNIP LSTLDLHPR.I;R.IDLAIDGADEVDPNLDLVK.  
G**

Accession No.: **Gohir.A11G253800.1.p**

Mascot score: **113**

Sequence coverage %: **13**

Calculated Mr: **29906**

Calculated pI: **6.44**

PFF Searched Score:

Ions score is  $-10 \cdot \log(P)$ , where P is the probability that the observed match is a random event. Individual ions scores  $> 32$  indicate identity or extensive homology ( $p < 0.05$ ). Protein scores are derived from ions scores as a non-probabilistic basis for ranking protein hits.

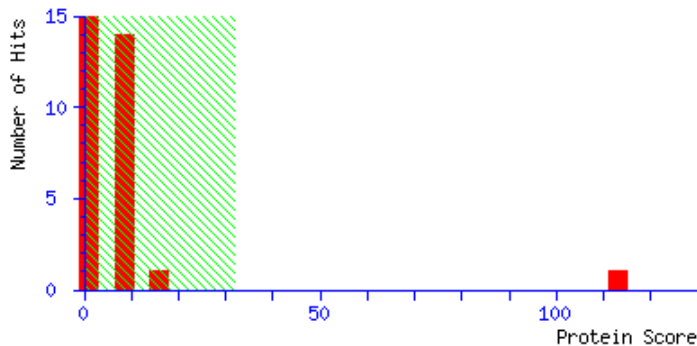

Matched peptide sequences: shown in **Bold Red**:

```
1 MASLSLNLSS LHHTSINPLI LRCTPLNLRT PSQKPFSIRS QAAPVLSQDD
51 LKKLAADKAV ESVKSGMILG LGTGSTAAFV VDKIGQLLST GQLSNIVGIP
101 TSKRTQEQAASLNIP LSTLDLHPRIDLAIDGADEVDPNLDLVKGRGGALL
151 REKIVEAASS SFIVVADESK LVSGLGGSGL AMPVEVVQFC WKYNLIRLQG
201 LFKELGCEAK LRLVGDGSEK PYVTDNGNYI VDLYFKNPIK DGFGAGKEIS
251 ALEGVVEHGL FLGMATSVII AGKTGIEVMT K
```

Spot No.: **G24**

Protein name: **Photosystem I light harvesting complex gene 3**

Peptide sequences:

**K.AGLIPAETALPWFR.T;K.YLGGSGEPAYPGGPLFNPLGFGKD  
EK.S**

Accession No.: **Gohir.A11G146500.1.p**

Mascot score: **152**

Sequence coverage %: **8.86**

Calculated Mr: **29458**

Calculated pI: **14**

PFF Searched Score:

Ions score is  $-10 \cdot \log(P)$ , where P is the probability that the observed match is a random event. Individual ions scores  $> 35$  indicate identity or extensive homology ( $p < 0.05$ ). Protein scores are derived from ions scores as a non-probabilistic basis for ranking protein hits.

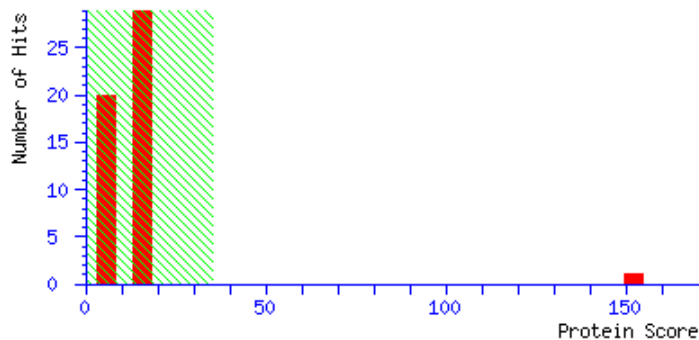

Matched peptide sequences: shown in **Bold Red**:

```
1 MATQALVSSS LTYSVETARQ ILGAKRQIGS SRKGSFVVKA ASTPPVKQGA
51 DRPLWFASKQ SLSYLDGSLP GDYGFDPGLG SDPEGPGGFI EPKWLAYGEI
101 INGRYAMLGA VGAIAPEILG KAGLIPAETA LPWFRTGVIP PAGTYNYWAD
151 PYTLFVFEMA LMGFAEHRRF QDWAKPGSMG KQYFLGFEKY LGGSGEPAYP
201 GGPLFNPLGF GKDEKSLKDL KLKEVKNGRL AMLAILGYFI QGLVTGVGPY
251 QNLLDHLADP FNNNVLTNLK FH
```

Spot No.: **H1**

Protein name:

Peptide sequences:

Accession No.:

Mascot score:

Sequence coverage %:

Calculated Mr:

Calculated pI:

PFF Searched Score:

Ions score is  $-10 \cdot \log(P)$ , where P is the probability that the observed match is a random event. Individual ions scores  $> 34$  indicate identity or extensive homology ( $p < 0.05$ ). Protein scores are derived from ions scores as a non-probabilistic basis for ranking protein hits.

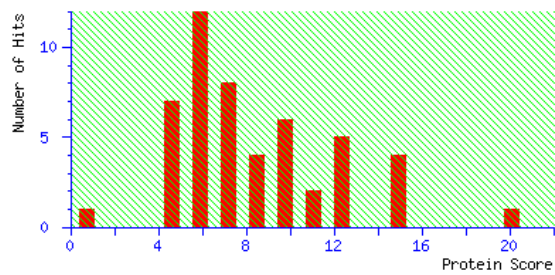

Matched peptide sequences: shown in **Bold Red**:

Spot No.: **H2**

Protein name: **Oxygen-evolving enhancer protein 2-1**

Peptide sequences:

**K.EVEFPGQVLR.Y;K.SITDYGSPEEFLSSVDYLLGK.Q;K.TDSE  
GGFDSGAVATANILESSSSTVGGKPYYFLSVLTR.T;K.PYYFLS  
VLTR.T**

Accession No.: **Gohir.D04G034900.1.p**

Mascot score: **352**

Sequence coverage %: **26**

Calculated Mr: **28189**

Calculated pI: **7.67**

PFF Searched Score:

Ions score is  $-10 \cdot \log(P)$ , where P is the probability that the observed match is a random event. Individual ions scores  $> 34$  indicate identity or extensive homology ( $p < 0.05$ ). Protein scores are derived from ions scores as a non-probabilistic basis for ranking protein hits.

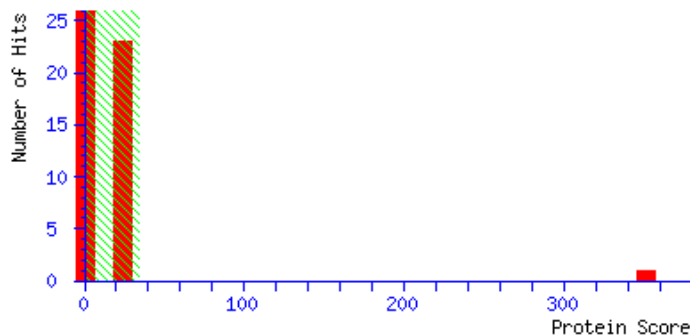

Matched peptide sequences: shown in **Bold Red**:

```
1  MASAACFLHH  HALTTNGRSS  SLPPSLRQVS  NMKPNQQVVC  KAQKQEDDGS
51  LVSRRALALTV  LIGAAAVGSK  VSPADAAAYGE  AANVFGKPKT  DTEFMPYNGD
101 GFKLSIPSKW  NPSKEVEFPG  QVLR YEDNFD  TTSNLSVMIT  PTDKKSITDY
151 GSP EEF LSSV  DYLLGKQAYF  GKTDSEGGFD  SGAVATANIL  ESSSSTVGGK
201 PYYFLSVLTR  TADGDEGGKH  QLITATVNNG  KLYICKAQAG  DKRWFKGARK
251 FVESAASSFS  VA
```

Spot No.: **H3**

Protein name: **Photosystem II subunit P-1**

Peptide sequences:

**K.EVEFPGQVLR.Y;K.SITDYGSPEEFLSSVDYLLGK.Q;K.TDAE  
GGFDSGAVATANILESSSSTVGGKPYYFLSVLTR.T;K.PYYFLS  
VLTR.T**

Accession No.: **Gohir.A05G380700.1.p**

Mascot score: **313**

Sequence coverage %: **26**

Calculated Mr: **28109**

Calculated pI: **7.67**

PFF Searched Score:

Ions score is  $-10 \cdot \log(P)$ , where  $P$  is the probability that the observed match is a random event. Individual ions scores  $> 34$  indicate identity or extensive homology ( $p < 0.05$ ). Protein scores are derived from ions scores as a non-probabilistic basis for ranking protein hits.

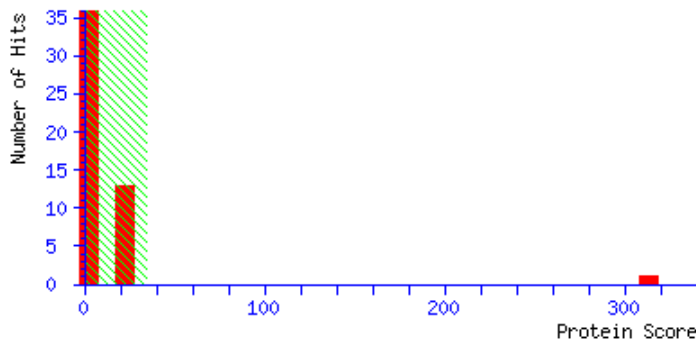

Matched peptide sequences: shown in **Bold Red**:

```
1  MASAACFLHH  HALTTNGRSS  SLSPSLRQVS  NMKPTQQVVC  KAQKQEDDGS
51  LVSRRRLALTV  LIGAAAVGSK  VSPADAAAYGE  AANVFGKPKT  DTDMPYSGD
101 GFKLSIPSKW  NPSKEVEFPG  QVLRYEDNFD  TTSNLSVMIT  PTDKKSITDY
151 GSPEEFLSSV  DYLLGKQAYF  GKTDAEGGFD  SGAVATANIL  ESSSSTVGGK
201 PYYFLSVLTR  TADGDEGGKH  QLITATVNNG  KLYICKAQAG  DKRWFKGARK
251 FVESAASSFS  VA
```

Spot No.: **H5**

Protein name: **Ribulose-bisphosphate carboxylases**

Peptide sequences:

**K.LTYYTPEYEVK.D;K.DTDILAAFR.V;K.TFKGPPHGIQVER.D**

Accession No.: **Gohir.A03G084800.1**

Mascot score: **165**

Sequence coverage %: **8**

Calculated Mr: **46433**

Calculated pI: **5.99**

PFF Searched Score:

Ions score is  $-10 \cdot \log(P)$ , where P is the probability that the observed match is a random event. Individual ions scores  $> 35$  indicate identity or extensive homology ( $p < 0.05$ ). Protein scores are derived from ions scores as a non-probabilistic basis for ranking protein hits.

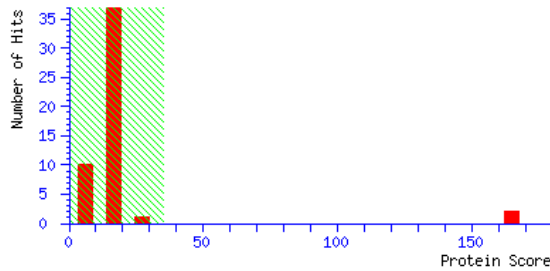

Matched peptide sequences: shown in **Bold Red**:

```
1 MSCREGLMSP QTETKASVGF KAGVKEYKLT YYTPEYEVKD TDILAAFRVT
51 PQPGVPPEEA GAAVAESST GTWTTMWDG LTSLDRYEGR CYDIEPVSGE
101 EDQYICYVAY PLDLFEEGSV TNMFTSIVGN VFGFKALRAL RLEDLRVPTA
151 YIKTFKGPPH GIQVERDKLN KYGRPLLCT IKPKLDDENV NSQPFMRWRD
201 RFLFCAKAIF KSQAETGEIK GHYLNATAGT CEEMIKRAMC ARELGVPIVM
251 HDYLTDNGLL LHIHRAMHAV IDRQKNHGMH FRVLAKALRM SGGDHIHAGT
301 VVDRSRGIYF TQDWVSMPGV LPVASGGIHW WHMPALIEIF GDDSVLQFAN
351 RVALEACVQA RNEGRDLARE GNEIIREASK WSPELAVACE VWKAIKFEFD
401 AVDKLKDVEK
```



Spot No.: **H10**

Protein name: **Photosynthetic electron transfer C**

Peptide sequences:

**K.DAIGNDVIAEEWLK.T;K.FICPCHGSQYNDQGR.V;R.GPAPLS  
LALAHAGVEDGK.V;K.VVFVPWVETDFR.T**

Accession No.: **Gohir.D02G184300.1.p**

Mascot score: **256**

Sequence coverage %: **25**

Calculated Mr: **24700**

Calculated pI: **8.48**

PFF Searched Score:

Ions score is  $-10 \cdot \log(P)$ , where P is the probability that the observed match is a random event. Individual ions scores  $> 34$  indicate identity or extensive homology ( $p < 0.05$ ). Protein scores are derived from ions scores as a non-probabilistic basis for ranking protein hits.

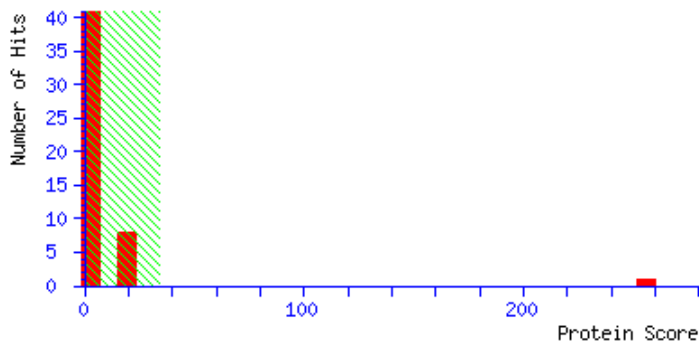

Matched peptide sequences: shown in **Bold Red**:

```
1 MASSTLSPAA PWQLCSGKSG MFCPSQAFV KPTRTHMVKN EKMGRITCQA
51 TSIPADRVPD MGKRQLMNL LLGAI SLPSG FMLVPYAAFF VPSGGRGTGG
101 GTVAKDAIGN DVIAEEWLKT HGPGDRTLQ GLKGDPTYLV VEKDRILATY
151 GINAVCTHLG CVVPWNQAEN KFICPCHGSQ YNDQGRVVRG PAPLSLALAH
201 AGVEDGKVVF VPWVETDFRT GDGPWWS
```

**Spot No.: H15**

**Protein name: Nucleoside diphosphate kinase 2**

**Peptide sequences:**

**Accession No.: Gohir.A09G245300.1**

**Mascot score:**                      **Sequence coverage %:**

**Calculated Mr:**                      **Calculated pI:**

**PFF Searched Score:**

Ions score is  $-10 \cdot \log(P)$ , where P is the probability that the observed match is a random event. Individual ions scores  $> 35$  indicate identity or extensive homology ( $p < 0.05$ ). Protein scores are derived from ions scores as a non-probabilistic basis for ranking protein hits.

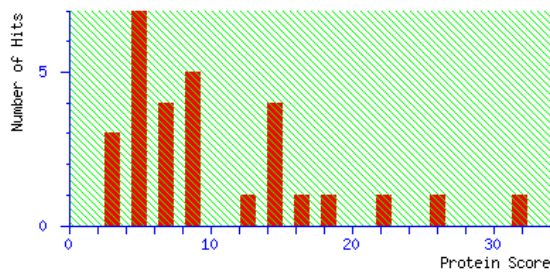

**Matched peptide sequences: shown in Bold Red:**

Spot No.: **H19**

Protein name: **Nucleoside diphosphate kinase family protein**

Peptide sequences:

**R.GLVGEIIGR.F;K.IIGATNPAESAPGTIR.G;R.GDFAIDIGR.N**

Accession No.: **Gohir.D08G160400.1.p**

Mascot score: **106**

Sequence coverage %: **22**

Calculated Mr: **16400**

Calculated pI: **6.30**

PFF Searched Score:

Ions score is  $-10 \cdot \log(P)$ , where P is the probability that the observed match is a random event. Individual ions scores  $> 34$  indicate identity or extensive homology ( $p < 0.05$ ). Protein scores are derived from ions scores as a non-probabilistic basis for ranking protein hits.

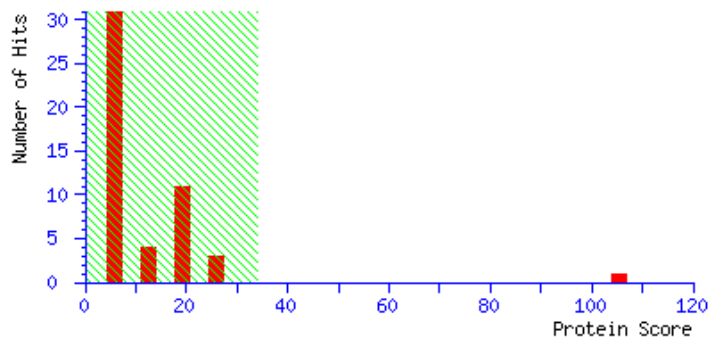

Matched peptide sequences: shown in **Bold Red**:

```
1 MEQTFIMIKP DGVQRGLVGE IIGRFEKKGF YLKGLKLITV DQSFAEKHYA
51 DLSAKPFFNG LIEYIISGPV VAMIWEGKNV VTTGRKIIGA TNPAESAPGT
101 IRGDFAIDIG RNVIHGSDSV ESAKKEIALW FPESPVNWQS SVHPWIYE
```
