# Supplementary material for: An improved protein extraction method applied to cotton leaves is compatible with 2-DE and LC-MS
Source: PubMed Central journal article supplement (PMC6458646; doi:10.1186/s12864-019-5658-5), 2019-04-11

## Additional file 6

### Molecular Function

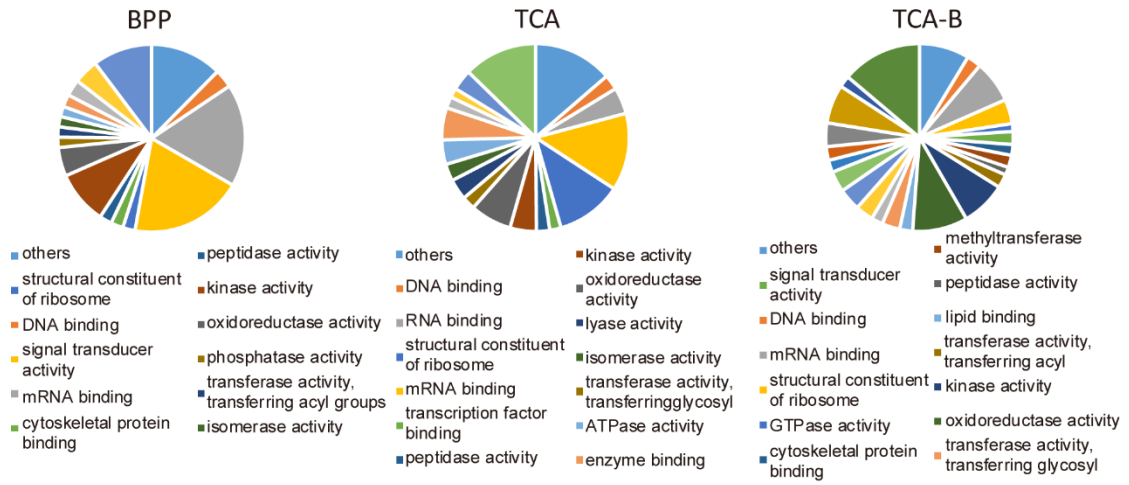

Supplement: 12864_2019_5658_MOESM6_ESM.pdf [file 12864_2019_5658_MOESM6_ESM.pdf]
